# Supplementary material
Source: PubMed Central journal article supplement (PMC4794072)
Supplement: alfz022734.w2_default.pdf [file alfz022734.w2_default.pdf]

## Appendix 2. Included Studies from network meta-analysis

1. Adair CD, Weeks JW, Barrilleaux S, Edwards M, Burlison K, et al. (1998) Oral or vaginal misoprostol administration for induction of labor: a randomized, double-blind trial. *Obstetrics & Gynecology*. pp. 810-813.
2. Adam I, Hassan OA, Elhassan EM (2005) Oral misoprostol vs. vaginal misoprostol for cervical ripening and labour induction. *International Journal of Gynecology & Obstetrics*. pp. 142-143.
3. Agarwal N, Gupta A, Kriplani A, Bhatla N, Parul N (2003) Six hourly vaginal misoprostol versus intracervical dinoprostone for cervical ripening and labor induction. *Journal of Obstetrics and Gynaecology Research*. pp. 147-151.
4. Al-Malt A, Ashmead G, Amini S (1995) Cervical ripening: effect of vaginal PGE2 on bishop score. *American Journal of Obstetrics and Gynecology*. pp. 297.
5. Al-Sebai MAH, Manasse PR (1993) Induction of labour in primigravid women with an unfavourable cervix: a prospective comparative study of prostaglandin E2 vaginal tablets and gel. *Journal of Obstetrics and Gynaecology*. pp. 112-113.
6. Anand AK, Mir S (2012) A randomized comparison between intravaginal misoprostol and intracervical dinoprostone for cervical ripening and labour induction in participants with unfavourable cervixes. *JK Science*. pp. 115-119.
7. Ayad IAA (2002) Vaginal misoprostol in managing premature rupture of membranes. *Eastern Mediterranean Health Journal*. pp. 515-520.
8. Ayaz A, Saeed S, Farooq MU, Ahmad F, Bahoo LA, et al. (2008) Pre-labor rupture of membranes at term in patients with an unfavorable cervix: active versus conservative management. *Taiwanese Journal of Obstetrics & Gynecology*. pp. 192-196.
9. Ayaz A, Shaukat S, Farooq MU, Mehmood K, Ahmad I, et al. (2010) Induction of labor: a comparative study of intravaginal misoprostol and dinoprostone. *Taiwanese Journal of Obstetrics & Gynecology*. pp. 151-155.
10. Bartha JL, Comino-Delgado R, Garcia-Benasach F, Martinez-Del-Fresno P, Moreno-Corral LJ (2000) Oral misoprostol and intracervical dinoprostone for cervical ripening and labor induction: a randomized comparison. *Obstetrics & Gynecology*. pp. 465-469.
11. Beigi A, Kabiri M, Zarrinkoub F (2003) Cervical ripening with oral misoprostol at term. *International Journal of Gynecology & Obstetrics*. pp. 251-255.
12. Bennett KA, Butt K, Crane JMG, Hutchens D, Young DC (1998) A masked randomized comparison of oral and vaginal administration of misoprostol for labor induction. *Obstetrics & Gynecology*. pp. 481-486.
13. Bernstein EP (1991) Prostaglandin E2 gel for cervical ripening and labour induction: a multicentre placebo-controlled trial. *Canadian Medical Association Journal*. pp. 1249-1254.
14. Bezircioglu I, Akin MK, Baloglu A, Bicer M (2012) The efficacy of dinoprostone vaginal insert for active management of premature rupture of membranes at term: A randomized controlled trial. *Clinical and Experimental Obstetrics and Gynecology*. pp. 356-358.
15. Bounyasong S (2000) A randomized comparison between 25 microgram misoprostol gel and 50 microgram misoprostol vaginal tablet for induction of

- labour. *Thai Journal of Obstetrics and Gynaecology*. pp. 21-25.
16. Buchanan D, Macer J, Yonekura ML (1984) Cervical ripening with prostaglandin E2 vaginal suppositories. *Obstetrics & Gynecology*. pp. 659-663.
  17. Buser D, Mora G, Arias F (1997) A randomized comparison between misoprostol and dinoprostone for cervical ripening and labor induction in patients with unfavourable cervixes. *Obstetrics & Gynecology*. pp. 581-585.
  18. Buttino L, Garite TJ (1990) Intracervical prostaglandin in postdate pregnancy. A randomized trial. *Journal of Reproductive Medicine*. pp. 155-158.
  19. Cabrol D, Bernard N, Chouraqui A, Domenichini Y, Lemaire P, et al. (1988) Ripening of the cervix at term, using a single application of prostaglandin E2 gel intracervically. *Journal de Gynecologie, Obstetrique et Biologie de la Reproduction*. pp. 527-534.
  20. Campbell JM (1984) Induction of labour using prostaglandin E2 pessaries. *Clinical and Experimental Obstetrics & Gynecology*. pp. 1-5.
  21. Cararach V, Sentis J, Botet F, Foradada C, Manau D, et al. (1996) Cervical prostaglandin E1 compared with expectant management and with systematic induction in PROM near term, with bad cervical conditions. I-maternal results. 3rd World Congress of Perinatal Medicine; 1996 Oct 20-24; San Francisco, USA. pp. 44.
  22. Cardozo L, Fysh J, Pearce JM (1986) Prolonged pregnancy: the management debate. *BMJ*. pp. 1059-1063.
  23. Carlan SJ, Bouldin S, Blust D, O'Brien WF (2001) Safety and efficacy of misoprostol orally and vaginally: a randomized trial. *Obstetrics & Gynecology*. pp. 107-112.
  24. Chang CH, Chang FM (1997) Randomized comparison of misoprostol and dinoprostone for preinduction cervical ripening and labor induction. *Journal of the Formosan Medical Association*. pp. 366-369.
  25. Charoenkul S, Sripramote M (2000) A randomized comparison of one single dose of vaginal 50 microg misoprostol with 3 mg dinoprostone in pre-induction cervical ripening. *Journal of the Medical Association of Thailand*. pp. 1026-1034.
  26. Chatterjee MS, Ramchandran K, Ferlita J, Mitrik L (1990) Prostaglandin E2 (PGE2) vaginal gel for cervical ripening. *European Journal of Obstetrics & Gynecology and Reproductive Biology*. pp. 197-202.
  27. Chaudhuri S, Mitra SN, Banerjee PK, Biswas PK, Bhattacharyya S (2011) Comparison of vaginal misoprostol tablets and prostaglandin E2 gel for the induction of labor in premature rupture of membranes at term: a randomized comparative trial. *Journal of Obstetrics and Gynaecology Research*. pp. 1564-1571.
  28. Cheng SY, Ming H, Lee JC (2008) Titrated oral compared with vaginal misoprostol for labor induction: a randomized controlled trial. *Obstetrics & Gynecology*. pp. 119-125.
  29. Cheung PC, Yeo EL, Wong KS, Tang LC (2006) Oral misoprostol for induction of labor in prelabor rupture of membranes (PROM) at term: a randomized control trial. *Acta Obstetrica et Gynecologica Scandinavica*. pp. 1128-1133.
  30. Chitrakar NS (2012) Comparison of Misoprostol versus Dinoprostone for pre-induction cervical ripening at-term. *Journal of Nepal Health Research Council*. pp. 10-15.

31. Chua S, Arulkumaran S, Yap C, Selamat N, Ratnam SS (1995) Premature rupture of membranes in nulliparas at term with unfavorable cervixes: a double blind randomized trial of prostaglandin and placebo. *Obstetrics & Gynecology*. pp. 550-554.
32. Chuck FJ, Huffaker BJ (1995) Labor induction with intravaginal misoprostol versus intracervical prostaglandin E2 gel (Prepidil gel): randomized comparison. *American Journal of Obstetrics and Gynecology*. pp. 1137-1142.
33. Chung T, Rogers MS, Gordon H, Chang A (1992) Prelabour rupture of the membranes at term and unfavourable cervix: a randomized placebo-controlled trial on early intervention with intravaginal prostaglandin E2 gel. *Australian and New Zealand Journal of Obstetrics and Gynaecology*. pp. 25-27.
34. Chyu JK, Strassner HT (1997) Prostaglandin E2 for cervical ripening: a randomized comparison of Cervidil versus Prepidil. *American Journal of Obstetrics and Gynecology*. pp. 606-611.
35. Clark A, Cook V, Hill P, Spinnato J (1998) Cervical ripening and labor induction: misoprostol vs dinoprostone. *American Journal of Obstetrics and Gynecology*. pp. S30.
36. collaborative (1994) A clinical trial of induction of labor vs expectant management of postterm pregnancy. *American Journal of Obstetrics and Gynecology*. pp. 716-723.
37. Colon I, Clawson K, Hunter K, Druzin ML, Taslimi MM (2005) Prospective randomized clinical trial of inpatient cervical ripening with stepwise oral misoprostol vs vaginal misoprostol. *American Journal of Obstetrics and Gynecology*. pp. 747-752.
38. Corrado F, Cannata ML, Facciola G, Stella NC (2001) Intravaginal vs. intracervical pge2 gel first application for labor induction. *International Journal of Gynecology & Obstetrics*. pp. 195-197.
39. Curet LB, Gauger LJ (1989) Cervical ripening with intravaginal prostaglandin E2 gel. *International Journal of Gynecology & Obstetrics*. pp. 221-228.
40. da Graca Krupa F, Cecatti JG, de Castro Surita FG, Milanez HM, Parpinelli MA (2005) Misoprostol versus expectant management in premature rupture of membranes at term. *BJOG: an international journal of obstetrics and gynaecology*. pp. 1284-1290.
41. Dallenbach P, Boulvain M, Viardot C, Irion O (2003) Oral misoprostol or vaginal dinoprostone for labor induction: a randomized controlled trial. *American Journal of Obstetrics and Gynecology*. pp. 162-167.
42. Danielian P, Porter B, Ferri N, Summers J, Templeton A (1999) Misoprostol for induction of labour at term: a more effective agent than dinoprostone vaginal gel. *British Journal of Obstetrics and Gynaecology*. pp. 793-797.
43. Darroca RJA, Buttino L, Miller J, Khamis HJ (1996) Prostaglandin E2 gel for cervical ripening in patients with an indication for delivery. *Obstetrics & Gynecology*. pp. 228-230.
44. Deng LL, Huang ZJ (1999) Observation on the efficacy of intravaginal misoprostol for cervical ripening in the third trimester of pregnancy. *Journal of Nursing Science*. pp. 67-68.
45. Denguezli W, Trimech A, Haddad A, Hajjaji A, Saidani Z, et al. (2007) Efficacy and

- safety of six hourly vaginal misoprostol versus intracervical dinoprostone: a randomized controlled trial. *Archives of Gynecology and Obstetrics*. pp. 119-124.
46. Deo S, Iqbal B, Das V, Agarwal A, Singh R (2012) Evaluation of non-pharmacological method-transcervical foley catheter to intravaginal misoprostol and prostaglandin E2 gel for preinduction cervical ripening. *Biomedical Research*. pp. 247-252.
  47. Diro M, Adra A, Gilles JM, Nassar A, Rodriguez A, et al. (1999) A double-blind randomized trial of two dose regimens of misoprostol for cervical ripening and labor induction. *Journal of Maternal-Fetal Medicine*. pp. 114-118.
  48. Doany W, McCarty J (1997) Outpatient management of the uncomplicated postdate pregnancy with intravaginal prostaglandin e2 gel and membrane stripping. *Journal of Maternal Fetal Medicine*. pp. 71-78.
  49. Dodd JM, Crowther CA, Robinson JS (2006) Oral misoprostol for induction of labour at term: randomised controlled trial. *BMJ*. pp. 509-513.
  50. Dommissie J, Davey DA, Allerton G (1980) The induction of labour with prostaglandin E2 tablets administered intravaginally. *South African Medical Journal*. pp. 518-519.
  51. Dyar TR, Greig P, Cummings R, Nichols K (2000) The efficacy and safety of oral versus vaginal misoprostol for the induction of term labour. *American Journal of Obstetrics and Gynecology*. pp. S135.
  52. Egarter C, Kofler E, Fitz R, Husslein P (1989) Is induction of labor indicated in prolonged pregnancy? Results of a prospective randomised trial. *Gynecologic and Obstetric Investigation*. pp. 6-9.
  53. Ekman G, Forman A, Marsal K, Ulmsten U (1983) Intravaginal versus intracervical application of prostaglandin E2 in viscous gel for cervical priming and induction of labor at term in patients with an unfavorable cervical state. *American Journal of Obstetrics and Gynecology*. pp. 657-661.
  54. El-Din NMN, El-Moghazt DAM (2000) Cervical ripening and induction of labour with misoprostol, prostaglandin E2 or prostaglandin E2 gel: a randomized comparative clinical trial [abstract]. XVI FIGO World Congress of Obstetrics & Gynecology (Book 4); 2000 Sept 3-8; Washington DC, USA. pp. 29.
  55. Elhassan EM, Mirghani OA, Adam I (2005) Cervical ripening and labor induction with 25ug vs. 50ug of intravaginal misoprostol. *International Journal of Gynecology & Obstetrics*. pp. 234-235.
  56. Elhassan EM, Nasr AM, Adam I (2007) Sublingual compared with oral and vaginal misoprostol for labor induction. *International Journal of Gynecology & Obstetrics*. pp. 153-154.
  57. Elhassan M, Mirghani OA, Adam I (2004) Intravaginal misoprostol vs dinoprostone as cervical ripening and labor-inducing agents. *International Journal of Gynecology & Obstetrics*. pp. 285-286.
  58. El-Mardi AA, El-Qarmalawi MA, Siddik M, El-Haroni A, Ammar A, et al. (1991) A comparison of single prostaglandin E2 vaginal tablet with prostaglandin E2 vaginal pessaries for induction of labor at term. *International Journal of Gynecology & Obstetrics*. pp. 221-224.
  59. El-Shawarby SA, Connell RJ (2006) Induction of labour at term with vaginal prostaglandins preparations: a randomised controlled trial of Prostin vs Propess.

- Journal of Obstetrics and Gynaecology. pp. 627-630.
60. El-Sherbiny MT, El-Gharieb IH, Gewely HA (2001) Vaginal misoprostol for induction of labor: 25 vs. 50 microg dose regimen. *International Journal of Gynecology & Obstetrics*. pp. 25-30.
  61. Eroglu D, Oktem M, Yanik F, Kuscu E (2007) Labor induction at term: a comparison of the effects of 50 microg and 25 microg vaginal misoprostol. *Clinical and Experimental Obstetrics and Gynecology*. pp. 102-105.
  62. Facchinetti F, Venturini P, Fazzio M, Volpe A (2007) Elective cervical ripening in women beyond the 290th day of pregnancy: a randomized trial comparing 2 dinoprostone preparations. *Journal of Reproductive Medicine*. pp. 945-949.
  63. Facchinetti F, Venturini P, Verocchi G, Volpe A (2005) Comparison of two preparations of dinoprostone for pre-induction of labour in nulliparous woman with very unfavourable cervical condition: a randomised clinical trial. *European Journal of Obstetrics & Gynecology and Reproductive Biology*. pp. 189-193.
  64. Farah LA, Sanchez Ramos L, Rosa C, Del Valle GO, Gaudier FL, et al. (1997) Randomized trial of two doses of the prostaglandin E1 analog misoprostol for labor induction. *American Journal of Obstetrics and Gynecology*. pp. 364-369.
  65. Ferraiolo A, Dellacasa I, Bentivoglio G, Ferrero S, Ragni N (2010) Evaluation of patients' satisfaction of cervical ripening using dinoprostone by either intravaginal gel or pessary: an open-label, randomized, prospective study. *Journal of Reproductive Medicine*. pp. 423-429.
  66. Fisher SA, Mackenzie VP, Davies GAL (2001) Oral versus vaginal misoprostol for induction of labor: a double-blind randomized controlled trial. *American Journal of Obstetrics and Gynecology*. pp. 906-910.
  67. Fletcher H, Mitchell S, Frederick J, Simeon D, Brown D (1994) Intravaginal misoprostol vs dinoprostone as cervical ripening and labor-inducing agents. *Obstetrics & Gynecology*. pp. 244-247.
  68. Fletcher HM, Mitchell S, Simeon D, Frederick J, Brown D (1993) Intravaginal misoprostol as a cervical ripening agent. *British Journal of Obstetrics and Gynaecology*. pp. 641-644.
  69. Frass KA, Shuaib AA, Al-Harazi AH (2011) Misoprostol for induction of labor in women with severe preeclampsia at or near term. *Saudi Medical Journal*. pp. 679-684.
  70. Frohn WE, Simmons S, Carlan SJ (2002) Prostaglandin e2 gel versus misoprostol for cervical ripening in patients with premature rupture of membranes after 34 weeks. *Obstetrics & Gynecology*. pp. 206-210.
  71. Garry D, Figueroa R, Kalish RB, Catalano CJ, Maulik D (2003) Randomized controlled trial of vaginal misoprostol versus dinoprostone vaginal insert for labor induction. *Journal of Maternal-Fetal & Neonatal Medicine*. pp. 254-259.
  72. Gelisen O, Caliskan E, Dilbaz S, Ozdas E, Dilbaz B, et al. (2005) Induction of labor with three different techniques at 41 weeks of gestation or spontaneous follow-up until 42 weeks in women with definitely unfavorable cervical scores. *European Journal of Obstetrics & Gynecology and Reproductive Biology*. pp. 164-169.
  73. Getgan M, Paisarntantiwong R, Sripramote M (2003) A randomized comparison between 50 micrograms orally and misoprostol 25 micrograms vaginally for cervical ripening and induction of labor. *Thai Journal of Obstetrics and*

- Gynaecology. pp. 276.
74. Gherman RB, Browning J, O'Boyle A, Murphy Goodwin T (2001) Oral misoprostol vs. intravaginal prostaglandin E2 for preinduction cervical ripening. A randomized trial. *Journal of Reproductive Medicine*. pp. 641-646.
  75. Gilson GJ, Izquierdo LA, Chatterjee MS, Curet LB, Qualls CR (1993) Prevention of cesarean section: does intracervical dinoprostone work? *Western Journal of Medicine*. pp. 149-152.
  76. Girija S, Manjunath AP (2009) Comparison of two dosing regimens of vaginal misoprostol for labour induction: a randomised controlled trial. *Journal of the Turkish German Gynecology Association Artemis*. pp. 220-225.
  77. Girija S, Manjunath AP (2011) A randomized controlled trial comparing low dose vaginal misoprostol and dinoprostone gel for labor induction. *Journal of Obstetrics and Gynecology of India*. pp. 153-160.
  78. Gittens L, Schenkel C, Strassberg S, Apuzzio J (1996) Vaginal birth after cesarean section: comparison of outpatient use of prostaglandin gel to expectant management. *American Journal of Obstetrics and Gynecology*. pp. 354.
  79. Gottschall DS, Borgida AF, Mihalek JJ, Sauer F, Rodis JF (1997) A randomized clinical trial comparing misoprostol with prostaglandin E2 gel for preinduction cervical ripening. *American Journal of Obstetrics and Gynecology*. pp. 1067-1070.
  80. Graves GR, Baskett TF, Gray JH, Luther ER (1985) The effect of vaginal administration of various doses of prostaglandin E2 gel on cervical ripening and induction of labour. *American Journal of Obstetrics and Gynecology*. pp. 178-181.
  81. Green C, Pedder G, Mason G (1998) A randomised trial of Propess against prostin gel for induction of labour at term. *British Journal of Obstetrics and Gynaecology*. pp. 82.
  82. Greer IA, McLaren M, Calder AA (1990) Vaginal administration of PGE2 for induction of labor stimulates endogenous PGF2alpha production. *Acta Obstetrica et Gynecologica Scandinavica*. pp. 621-625.
  83. Gregson S, Waterstone M, Norman I, Murrells T (2005) A randomised controlled trial comparing low dose vaginal misoprostol and dinoprostone vaginal gel for inducing labour at term. *BJOG: an International Journal of Obstetrics & Gynaecology*. pp. 438-444.
  84. Grunberger W, Spona J (1986) The effect of paracervical PGE2 instillation on levels of maternal serum 13,14-dihydro-15-keto-PGF2alpha and progesterone. *Archives of Gynecology*. pp. 93-99.
  85. Gupta HP, Singh U, Mehrotra S (2010) Comparative evaluation of 25 ug and 50ug of intravaginal misoprostol for induction of labor. *Journal of Obstetrics and Gynecology of India*. pp. 51-54.
  86. Hales KA, Rayburn WF, Turnbull GL, Christensen HD, Patatanian E (1994) Double-blind comparison of intracervical and intravaginal prostaglandin E2 for cervical ripening and induction of labor. *American Journal of Obstetrics and Gynecology*. pp. 1087-1091.
  87. Hall R, Duarte-Gardea M, Harlass F (2002) Oral versus vaginal misoprostol for labor induction. *Obstetrics & Gynecology*. pp. 1044-1048.

88. Hannah ME, Ohlsson A, Farine D, Hewson SA, Hodnett ED, et al. (1996) Induction of labor compared with expectant management for prelabor rupture of the membranes at term. *New England Journal of Medicine*. pp. 1005-1010.
89. Has R, Batukan C, Ermis H, Cevher E, Araman A, et al. (2002) Comparison of 25 and 50ug vaginally administered misoprostol for preinduction of cervical ripening and labor induction. *Gynecologic and Obstetric Investigation*. pp. 16-21.
90. Hayashi R, Keirse M (1983) PGE2 gel (Prepidil gel) for preinduction cervical softening. Personal communication.
91. Heinzl S, Ramzin MS, Schneider M, Luescher KP (1980) Priming of cervix with prostaglandin gel during immature birth situation at term (author's transl). *Zeitschrift fur Geburtshilfe und Perinatologie*. pp. 395-400.
92. Henrich W, Dudenhausen JW, Hanel C, Chen FC (2008) Oral misoprostol against vaginal dinoprostone for labor induction at term: a randomized comparison. *Zeitschrift fur Geburtshilfe und Neonatologie*. pp. 183-188.
93. Herabutya Y, P OP (1993) Ripening of the unfavorable cervix with prostaglandin E2: intracervical vs intravaginal route. *Journal of the Medical Association of Thailand*. pp. 63-68.
94. Herabutya Y, P OP, Pokirom J (1997) A comparison of intravaginal misoprostol and intracervical prostaglandin E2 gel for ripening of unfavourable cervix and labor induction. *Journal of Obstetrics and Gynaecology Research*. pp. 369-374.
95. Herabutya Y, Prasertsawat PO, Tongyai T, Isarangura N, Ayudhya N (1992) Prolonged pregnancy: the management dilemma. *International Journal of Gynecology & Obstetrics*. pp. 253-258.
96. Hidar S, Bibi M, Jerbi M, Bouguizene S, Noura M, et al. (2000) Contribution of intracervical pge2 administration in premature rupture of the membranes at term. Prospective randomised clinical trial. *Journal de Gynecologie, Obstetrique et Biologie de la Reproduction*. pp. 607-613.
97. Hoffmann RAM, Anthony J, Fawcus JAS (2001) Oral misoprostol vs placebo in the management of prelabor rupture of membranes at term. *International Journal of Gynecology & Obstetrics*. pp. 215-221.
98. Hofmeyr GJ, Alfrevic Z, Matonhodze B, Brocklehurst P, Campbell E, et al. (2001) Titrated oral misoprostol solution for induction of labour: a multi-centre, randomised trial. *BJOG: an international journal of obstetrics and gynaecology*. pp. 952-959.
99. Hosli I, Zanetti-Daellenbach R, Gairing A, Holzgreve W, Lapaire O (2008) Selection of appropriate prostaglandin for the induction of labor at term is more predictive for the achievement of delivery within 24 hours than pre-assessed cervical parameters - a prospective, randomized trial. *Geburtshilfe und Frauenheilkunde*. pp. 147-151.
100. How HY, Leaseburge L, Khoury JC, Siddiqi TA, Spinnato JA, et al. (2001) A comparison of various routes and dosages of misoprostol for cervical ripening and the induction of labor. *American Journal of Obstetrics and Gynecology*. pp. 911-915.
101. Howarth GR, Funk M, Steytler P, Pistorius L, Makin J, et al. (1996) A randomised controlled trial comparing vaginally administered misoprostol to vaginal dinoprostone gel in labour induction. *Journal of Obstetrics and Gynaecology*. pp.

- 474-478.
102. Husslein P, Egarter C, Sevelde P, Genger H, Salzer H, et al. (1986) Labor induction with 3 mg of prostaglandin E2 vaginal tablets. A renaissance of programmed labor? Results of a prospective randomized study. *Geburtshilfe und Frauenheilkunde*. pp. 83-87.
  103. Hutchon DJR, Geirsson R, Patel NB (1980) A double-blind controlled trial of PGE2 gel in cervical ripening. *International Journal of Gynecology & Obstetrics*. pp. 604-607.
  104. Incerpi MH, Fassett MJ, Kjos SL, Tran SH, Wing DA (2001) Vaginally administered misoprostol for outpatient cervical ripening in pregnancies complicated by diabetes mellitus. *American Journal of Obstetrics and Gynecology*. pp. 916-919.
  105. Irion O, Pedrazzoli J, Mermillod B (1998) A randomized trial comparing vaginal and cervical prostaglandin gel for cervical ripening and labor induction. *Obstetrics & Gynecology*. pp. 65-71.
  106. Jindal P, Avasthi K, Kaur M (2011) A comparison of vaginal vs. oral misoprostol for induction of labor-double blind randomized trial. *Journal of Obstetrics and Gynecology of India*. pp. 538-542.
  107. Kadanali S, Kucukozkan T, Zor N, Kumtepe Y (1996) Comparison of labor induction with misoprostol vs. oxytocin/prostaglandin E2 in term pregnancy. *International Journal of Gynecology & Obstetrics*. pp. 99-104.
  108. Kalkat RK, McMillan E, Cooper H, Palmer K (2008) Comparison of dinoprostone slow release pessary (Propess) with gel (Prostin) for induction of labour at term-a randomised trial. *Journal of Obstetrics and Gynaecology*. pp. 695-699.
  109. Keirse M, de Koning Gans HJ, Dutch Collaborative G (1995) Randomized comparison of the effects of endocervical and vaginal prostaglandin E2 gel in women with various degrees of cervical ripeness. *American Journal of Obstetrics and Gynecology*. pp. 1859-1864.
  110. Kemp B, Winkler M, Rath W (2000) Induction of labor by prostaglandin E2 in relation to the Bishop score. *International Journal of Gynecology & Obstetrics*. pp. 13-17.
  111. Khazardoost S, Hakimi P, Noorzadeh M, Shafaat M (2011) Misoprostol for cervical ripening: a clinical trial in 60 pregnant women. *Tehran University Medical Journal*. pp. 595-599.
  112. Khoury AN, Zhou QP, Gorenberg DM, Nies BM, Manley GE, et al. (2001) A comparison of intermittent vaginal administration of two different doses of misoprostol suppositories with continuous dinoprostone for cervical ripening and labor induction. *Journal of Maternal Fetal Medicine*. pp. 186-192.
  113. Kim JH, Yang HS (2000) A comparison of intravaginal misoprostol and dinoprostone for cervical ripening and labor induction in term pregnancy with unfavorable cervix. *Korean Journal of Obstetrics and Gynecology*. pp. 243-247.
  114. Kipikasa JH, Adair CD, Williamson J, Breen JM, Medford LK, et al. (2005) Use of misoprostol on an outpatient basis for postdate pregnancy. *International Journal of Gynecology & Obstetrics*. pp. 108-111.
  115. Kolderup L, McLean L, Grullon K, Safford K, Kilpatrick SJ (1999) Misoprostol is more efficacious for labor induction than prostaglandin e2, but is it associated with more risk? *American Journal of Obstetrics and Gynecology*. pp. 1543-1550.



116. Komala K, Reddy M, Jehan I, Suneetha B, Ramya V (2013) Comparative study of oral and vaginal misoprostol for induction of labour, maternal and foetal outcome. *Journal of Clinical and Diagnostic Research*. pp. 2866-2869.
117. Kovavisarach E, Wattanasiri S (1997) Comparison of intravaginal misoprostol and dinoprostone for cervical ripening and labour induction at term with unfavourable cervix: a randomized controlled study. *Thai Journal of Obstetrics and Gynaecology*. pp. 175-181.
118. Kovavisarach E, Worachet W (1998) Randomized controlled trial of intravaginal 50 mcg misoprostol and 3 mg dinoprostone for cervical ripening and labour induction at term with unfavorable cervix. *Thai Journal of Obstetrics and Gynaecology*. pp. 27-32.
119. Krithika KS, Aggarwal N, Suri V (2008) Prospective randomised controlled trial to compare safety and efficacy of intravaginal misoprostol with intracervical cerviprime for induction of labour with unfavourable cervix. *Journal of Obstetrics and Gynaecology: Krithika 2008*. pp. 294-297.
120. Kulshreshtha S, Sharma P, Mohan G, Singh S (2007) Comparative study of misoprostol vs dinoprostone for induction of labour. *Indian Journal of Physiology and Pharmacology*. pp. 55-61.
121. Kumar S, Awasthi RT, Kapur A, Srinivas S, Parikh H, et al. (2001) Induction of labour with misoprostol - a prostaglandin E1 analogue. *Medical Journal Armed Forces India*. pp. 107-109.
122. Kwon JS, Davies GAL, MacKenzie VP (2001) A comparison of oral and vaginal misoprostol for induction of labour at term: a randomised trial. *BJOG: an international journal of obstetrics and gynaecology*. pp. 23-26.
123. Langenegger EJ, Odendaal HJ, Grove D (2005) Oral misoprostol versus intracervical dinoprostone for induction of labour. *International Journal of Gynecology & Obstetrics*. pp. 242-248.
124. Larmon JE, Magann EF, Dickerson GA, Morrison JC (2002) Outpatient cervical ripening with prostaglandin e2 and estradiol. *Journal of Maternal-Fetal and Neonatal Medicine*. pp. 113-117.
125. Laube DW, Zlatnik FJ, Pitkin RM (1986) Preinduction cervical ripening with prostaglandin E2 intracervical gel. *Obstetrics & Gynecology*. pp. 54-57.
126. le Roux PA, Olarogun JO, Penny J, Anthony J (2002) Oral and vaginal misoprostol compared with dinoprostone for induction of labor: a randomized controlled trial. *Obstetrics & Gynecology*. pp. 201-205.
127. Lee HY (1997) A randomised double-blind study of vaginal misoprostol vs dinoprostone for cervical ripening and labour induction in prolonged pregnancy. *Singapore Medical Journal*. pp. 292-294.
128. Legarth J, Guldbaek E, Scher NJ (1988) The efficiency of prostaglandin E2 vaginal suppositories vs intracervical prostaglandin gel for induction of labor in patients with unfavorable inducibility prospects. *European Journal of Obstetrics & Gynecology and Reproductive Biology*. pp. 93-98.
129. Lemancewicz A, Urban R, Skotnicki MZ, Karpiuk A, Urban J (1999) Uterine and fetal doppler flow changes after misoprostol and oxytocin therapy for induction of labor in post-term pregnancies. *International Journal of Gynecology & Obstetrics*. pp. 139-145.

130. Levy R, Vaisbuch E, Furman B, Brown D, Volach V, et al. (2007) Induction of labor with oral misoprostol for premature rupture of membranes at term in women with unfavorable cervix: a randomized, double-blind, placebo-controlled trial. *Journal of Perinatal Medicine*. pp. 126-129.
131. Lien JM, Morgan MA, Garite TJ, Kennedy KA, Sasso DA, et al. (1998) Antepartum cervical ripening: applying prostaglandin e2 gel in conjunction with scheduled nonstress tests in postdate pregnancies. *American Journal of Obstetrics and Gynecology*. pp. 453-458.
132. Liggins GC (1979) Controlled trial of induction of labor by vaginal suppositories containing prostaglandin E2. *Prostaglandins*. pp. 167-172.
133. Lo JY, Alexander JM, McIntire DD, Leveno KJ (2003) Ruptured membranes at term: randomized, double-blind trial of oral misoprostol for labor induction. *Obstetrics & Gynecology*. pp. 685-689.
134. Lokugamage AU, Forsyth SF, Sullivan KR, El Refaey H, Rodeck CH (2003) Dinoprostone versus misoprostol: a randomized study of nulliparous women undergoing induction of labour. *Acta Obstetrica et Gynecologica Scandinavica*. pp. 133-137.
135. Lopes P, Besse O, Sagot P, Dantal F, de Morel P, et al. (1991) Effectiveness of prostaglandin E2 administered on a biodegradable support for cervical ripening and induction of labour. *Journal de Gynecologie, Obstetrique et Biologie de la Reproduction*. pp. 827-832.
136. Lopez-Farfan JA, Gamez-Guevara C (2010) Comparison of dinoprostone (ovules and gel) to achieve cervical ripening in patients with term pregnancy that occurs with premature membranes rupture. *Ginecologia y Obstetricia de Mexico*. pp. 110-115.
137. Lyndrup J, Nickelsen C, Guldbaek E, Weber T (1991) Induction of labor by prostaglandin E2: intracervical gel or vaginal pessaries? *European Journal of Obstetrics & Gynecology and Reproductive Biology*. pp. 101-109.
138. MacKenzie IZ, Embrey MP (1979) A comparison of PGE2 and PGF2alpha vaginal gel for ripening the cervix before induction of labour. *British Journal of Obstetrics and Gynaecology*. pp. 167-170.
139. MacLennan AH, Green RC (1980) A double blind dose trial of intravaginal prostaglandin F2alpha for cervical ripening and induction of labour. *Australian and New Zealand Journal of Obstetrics and Gynaecology*. pp. 80-83.
140. Magtibay PM, Ramin KD, Harris DY, Ramsey PS, Ogburn L (1998) Misoprostol as a labor induction agent. *Journal of Maternal Fetal Medicine*. pp. 15-18.
141. Mahmood TA (1989) A prospective comparative study on the use of prostaglandin E2 gel (2 mg) and prostaglandin E2 tablet (3 mg) for the induction of labour in primigravid women with unfavourable cervixes. *European Journal of Obstetrics & Gynecology and Reproductive Biology*. pp. 169-175.
142. Mahmood TA, Dick MJW (1995) A randomized trial of management of pre-labour rupture of membranes at term in multiparous women using vaginal prostaglandin gel. *Obstetrics & Gynecology*. pp. 71-74.
143. Mahmood TA, Dick MJW, Smith NC, Templeton AA (1992) Role of prostaglandin in the management of prelabour rupture of the membranes at term. *British Journal of Obstetrics and Gynaecology*. pp. 112-117.

144. Majoko F, Zwizwai M, Nystrom L, Lindmark G (2002) Vaginal misoprostol for induction of labour: a more effective agent than prostaglandin f2 alpha gel and prostaglandin e2 pessary. *Central African Journal of Medicine*. pp. 123-128.
145. McCaul JFt, Rogers LW, Perry KG, Jr., Martin RW, Allbert JR, et al. (1997) Premature rupture of membranes at term with an unfavorable cervix: comparison of expectant management, vaginal prostaglandin, and oxytocin induction. *Southern Medical Journal*. pp. 1229-1233.
146. McKenna DS, Costa SW, Samuels P (1999) Prostaglandin e2 cervical ripening without subsequent induction of labor. *Obstetrics & Gynecology*. pp. 11-14.
147. McKenna DS, Ester JB, Proffitt M, Waddell KR (2004) Misoprostol outpatient cervical ripening without subsequent induction of labor: a randomized trial. *Obstetrics & Gynecology*. pp. 579-584.
148. McLaren M, Greer IA, Smith JR, Godfree V, Graham N, et al. (1987) Maternal plasma bicycling PGE2 levels following vaginal administration of prostaglandin E2 pessaries in full term pregnancies. *Prostaglandins in Clinical Research*. pp. 199-203.
149. Megalo A, Petignat P, Hohlfeld P (2004) Influence of misoprostol or prostaglandin E2 for induction of labor on the incidence of pathological CTG tracing: a randomized trial. *European Journal of Obstetrics & Gynecology and Reproductive Biology*. pp. 34-38.
150. Mehrotra S, Singh U, Gupta HP (2010) A prospective double blind study using oral versus vaginal misoprostol for labour induction. *Journal of Obstetrics & Gynaecology*. pp. 461-464.
151. Meydanli MM, Caliskan E, Burak F, Narin MA, Atmaca R (2003) Labor induction post-term with 25 micrograms vs 50 micrograms of intravaginal misoprostol. *International Journal of Gynecology & Obstetrics*. pp. 249-255.
152. Meyer M, Pflum J, Howard D (2005) Outpatient misoprostol compared with dinoprostone gel for preinduction cervical ripening: a randomized controlled trial. *Obstetrics & Gynecology*. pp. 466-472.
153. Miller AM, Rayburn WF, Smith CV, Allen K, Bane T (1991) Uterine activity using ambulatory tocodynamometry after intravaginal prostaglandin E2 (PGE2) for cervical ripening. *American Journal of Obstetrics and Gynecology*. pp. 317.
154. Moodley J, Venkatachalam S, Songca P (2003) Misoprostol for cervical ripening at and near term--a comparative study. *South African Medical Journal*. pp. 371-374.
155. Murphy AJ, Jalland M, Pepperell RJ, Quinn MA (1980) Use of vaginal prostaglandin gel before induction of labour. *Australian and New Zealand Journal of Obstetrics and Gynaecology*. pp. 84-86.
156. Murray HG, Buonocore A, Hawley J (1995) A randomized trial of two preparations of vaginal prostaglandin for pre-induction cervical ripening. *Obstetrics & Gynecology*. pp. 880-885.
157. Murthy BK, Arkalgud MS (2006) Misoprostol alone versus a combination of dinoprostone and oxytocin for induction of labour. *Journal of Obstetrics and Gynaecology of India*. pp. 413-416.
158. Nager CW, Key TC, Moore TR (1987) Cervical ripening and labor outcome with preinduction intracervical prostaglandin E2 (prepidil) gel. *Journal of Perinatology*. pp. 189-193.

159. Nagpal MB, Raghunandan C, Salli A (2009) Oral misoprostol versus intracervical prostaglandin E2 gel for active management of premature rupture of membranes at term. *International Journal of Gynecology & Obstetrics*. pp. 23-26.
160. Nanda S, Singhal SR, Papneja A (2007) Induction of labour with intravaginal misoprostol and prostaglandin E2 gel: a comparative study. *Tropical Doctor*. pp. 21-24.
161. Neiger R, Greaves PC (2001) Comparison between vaginal misoprostol and cervical dinoprostone for cervical ripening and labor induction. *Tennessee Medicine*. pp. 25-27.
162. Neilson DR, Prins RP, Bolton RN, Mark C, Watson P (1983) A comparison of prostaglandin E2 gel and prostaglandin F2alpha gel for preinduction cervical ripening. *American Journal of Obstetrics and Gynecology*. pp. 526-532.
163. Newman M, Newman R (1997) Multiple-dose PGE2 cervical ripening on an outpatient basis: safety and efficacy. *American Journal of Obstetrics and Gynecology*. pp. S112.
164. Ngai SW, To WK, Lao T, Ho PC (1996) Cervical priming with oral misoprostol in pre-labor rupture of membranes at term. *Obstetrics & Gynecology*. pp. 923-926.
165. Nigam A, Madan M, Puri M, Agarwal S, Trivedi SS (2010) Labour induction with 25 micrograms versus 50 micrograms intravaginal misoprostol in full term pregnancies. *Tropical Doctor*. pp. 53-55.
166. Nimrod C, Currie J, Yee J, Dodd G, Persaud D (1984) Cervical ripening and labor induction with intracervical triacetin base prostaglandin E2 gel: a placebo-controlled study. *Obstetrics & Gynecology*. pp. 476-479.
167. Noah ML, Decoster JM, Fraser TJ, Orr JD (1987) Preinduction cervical softening with endocervical PGE2 gel. *Acta Obstetrica et Gynecologica Scandinavica*. pp. 3-7.
168. Nopdonrattakoon L (2003) A comparison between intravaginal and oral misoprostol for labor induction: a randomized controlled trial. *Journal of Obstetrics and Gynaecology Research*. pp. 87-91.
169. Nunes F, Rodrigues R, Meirinho M (1999) Randomized comparison between intravaginal misoprostol and dinoprostone for cervical ripening and induction of labor. *American Journal of Obstetrics and Gynecology*. pp. 626-629.
170. Nuutila M, Kajanoja P (1995) Cervical ripening prior to labor induction with intracervical prostaglandin E2 gel in patients with preeclampsia - A placebo-controlled study. *Hypertension in Pregnancy*. pp. 313-317.
171. Nuutila M, Kajanoja P (1996) Local administration of prostaglandin E2 for cervical ripening and labor induction: the appropriate route and dose. *Acta Obstetrica et Gynecologica Scandinavica*. pp. 135-138.
172. Oboro VO, Tabowei TO (2005) Outpatient misoprostol cervical ripening without subsequent induction of labor to prevent post-term pregnancy. *Acta Obstetrica et Gynecologica Scandinavica*. pp. 628-631.
173. O'Brien JM, Mercer BM, Cleary NT, Sibai BM (1995) Efficacy of outpatient induction with low-dose intravaginal prostaglandin E2: A randomized, double blind, placebo-controlled trial. *American Journal of Obstetrics and Gynecology*. pp. 1855-1859.
174. Ottinger WS, Menard MK, Brost BC (1998) A randomized clinical trial of

- prostaglandin e2 intracervical gel and a slow release vaginal pessary for preinduction cervical ripening. *American Journal of Obstetrics and Gynecology*. pp. 349-353.
175. Owen J, Winkler CL, Harris BA, Hauth JC, Smith MC (1991) A randomized, double-blind trial of prostaglandin E2 gel for cervical ripening and meta-analysis. *American Journal of Obstetrics and Gynecology*. pp. 991-996.
  176. Ozkan S, Caliskan E, Doger E, Yucesoy I, Ozeren S, et al. (2009) Comparative efficacy and safety of vaginal misoprostol versus dinoprostone vaginal insert in labor induction at term: a randomized trial. *Archives of Gynecology and Obstetrics*. pp. 19-24.
  177. Paisarntantiwong R, Getgan M (2005) A comparison between single dose of 50 microg oral misoprostol and 25 microg vaginal misoprostol for labor induction. *Journal of the Medical Association of Thailand*. pp. S56-S62.
  178. Pandis GK, Papageorghiou AT, Otigbah CM, Howard RJ, Nicolaidis KH (2001) Randomized study of vaginal misoprostol (pge1) and dinoprostone gel (pge2) for induction of labor at term. *Ultrasound in Obstetrics and Gynaecology*. pp. 629-635.
  179. Papanikolaou EG, Plachouras N, Drougia A, Andronikou S, Vlachou C, et al. (2004) Comparison of misoprostol and dinoprostone for elective induction of labour in nulliparous women at full term: a randomized prospective study. *Reproductive Biology & Endocrinology*. pp. 70.
  180. Patil PK, Swamy MK, Rao Radhika K (2005) Oral misoprostol vs intra-cervical dinoprostone for cervical ripening and labour induction. *Journal of Obstetrics and Gynaecology of India*. pp. 128-131.
  181. Paungmora N, Herabutya Y, P OP, Punyavachira P (2004) Comparison of oral and vaginal misoprostol for induction of labor at term: A randomized controlled trial. *Journal of Obstetrics and Gynaecology Research*. pp. 358-362.
  182. Peccerillo JA, Egan JFX, Borgida A, Campbell WA (1995) Comparison of intracervical PGE2 to intravaginal PGE2 for preinduction cervical ripening. *American Journal of Obstetrics and Gynecology*. pp. 298.
  183. Pedrazzoli J, Irion O, Mermillod B, Beguin F (1997) A randomized comparison of an intravaginal and an intracervical prostaglandin E2 gel for cervical ripening and induction of labour. 20th Congress of the Swiss Society of Gynecology and Obstetrics; 1997 June; Lugano, Switzerland. pp. 10.
  184. Perez Picanol E, Gamissans O, Lecumberri J, Jimenez M, Vernet M (1990) Ripening the cervix with intracervical PGE2 gel in term pregnancies with premature rupture of membranes. *Proceedings of 12th European Congress of Perinatal Medicine*; 1990 Sept 11-14; Lyon, France. pp. 197.
  185. Perry MY, Leaphart WL (2004) Randomized trial of intracervical versus posterior fornix dinoprostone for induction of labor. *Obstetrics & Gynecology*. pp. 13-17.
  186. Perryman D, Yeast JD, Holst V (1992) Cervical ripening: a randomized study comparing prostaglandin E2 gel to prostaglandin E2 suppositories. *Obstetrics & Gynecology*. pp. 670-672.
  187. Pongsatha S, Vijitrawiwat A, Tongsong T (2005) A comparison of labor induction by oral and vaginal misoprostol. *International Journal of Gynecology & Obstetrics*. pp. 140-141.

188. Poornima B, Dharma DB (2011) Premature rupture of membranes at term: Immediate induction with PGE 2 gel compared with delayed induction with oxytocin. *Journal of Obstetrics and Gynecology of India*. pp. 516-518.
189. Poulsen HK, Moller LK, Westergaard JG, Thomsen SG, Geirsson RT, et al. (1991) Open randomized comparison of prostaglandin E2 given by intracervical gel or vagitory for preinduction cervical ripening and induction of labor. *Acta Obstetricia et Gynecologica Scandinavica*. pp. 549-553.
190. Prager M, Eneroth-Grimfors E, Edlund M, Marions L (2008) A randomised controlled trial of intravaginal dinoprostone, intravaginal misoprostol and transcervical balloon catheter for labour induction. *BJOG: an international journal of obstetrics and gynaecology*. pp. 1443-1450.
191. Prasad RNV, Adaikan PG, Arulkumaran S, Ratnam SS (1989) Preinduction cervical priming with PGE2 vaginal film in primigravidae - a randomised, double blind, placebo controlled study. *Prostaglandins, Leukotrienes and Essential Fatty Acids*. pp. 185-188.
192. Prins RP, Bolton RN, Mark C, Neilson DR, Watson P (1983) Cervical ripening with intravaginal prostaglandin E2 gel. *Obstetrics & Gynecology*. pp. 459-462.
193. Puga O, Nien JK, Gomez R, Medina L, Carstens M, et al. (2001) Premature rupture of membranes after 35 weeks: a randomized clinical trial of induction of labor with oral versus vaginal administration of misoprostol. *American Journal of Obstetrics and Gynecology*. pp. S85.
194. Rabl M, Joura EA, Yucel Y, Egarter C (2002) A randomized trial of vaginal prostaglandin e2 for induction of labor. *Journal of Reproductive Medicine*. pp. 115-119.
195. Rahman H, Pradhan A, Kharka L, Renjhen P, Kar S, et al. (2013) Comparative evaluation of 50 microgram oral misoprostol and 25 microgram intravaginal misoprostol for induction of labour at term: a randomized trial. *Journal of Obstetrics and Gynaecology Canada : JOGC*. pp. 408-416.
196. Ramsey PS, Harris DY, Ogburn PL, Jr., Heise RH, Magtibay PM, et al. (2003) Comparative efficacy and cost of the prostaglandin analogs dinoprostone and misoprostol as labor preinduction agents. *American Journal of Obstetrics and Gynecology*. pp. 560-565.
197. Rath DM, Manas K (2007) Induction of labor with oral misoprostol in women with prelabor rupture of membranes at term. *Journal of Obstetrics and Gynecology of India*. pp. 505-508.
198. Rath W, Kemp B, Heyl W (1999) Prostaglandin E2 as a vaginal gel, intracervical gel or vaginal tablet for induction of labor: a prospective, randomized, multicenter trial. *Geburtshilfe und Frauenheilkunde*. pp. 323-329.
199. Rayburn W, Gosen R, Ramadei C, Woods R, Scott J (1988) Outpatient cervical ripening with prostaglandin E2 gel in uncomplicated postdate pregnancies. *American Journal of Obstetrics and Gynecology*. pp. 1417-1423.
200. Rayburn WF, Gittens LN, Lucas MJ, Gall SA, Martin ME (1999) Weekly administration of prostaglandin e2 gel compared with expectant management in women with previous cesareans Prepidil gel study group. *Obstetrics & Gynecology*. pp. 250-254.
201. Rayburn WF, Wapner RJ, Barss VA, Spitzberg E, Molina RD, et al. (1992) An

- intravaginal controlled-release prostaglandin E2 pessary for cervical ripening and initiation of labor at term. *Obstetrics & Gynecology*. pp. 374-379.
202. Richardson CJ, Evans JF, Meisel RL (1991) Duration of intracervical prostaglandin and Cesarean section. *American Journal of Obstetrics and Gynecology*. pp. 403.
  203. Rix P, Ladehoff P, Moller AM, Tilma KA, Zdravkovic M (1996) Cervical ripening and induction of delivery by local administration of prostaglandin E2 gel or vaginal tablets is equally effective. *Acta Obstetrica et Gynecologica Scandinavica*. pp. 45-47.
  204. Rizvi S, Umber F, Yusuf AW (2007) Labour induction at term; oral versus intravaginal misoprostol. *Annals of King Edward Medical College*. pp. 119-121.
  205. Roach VJ, Rogers MS (1997) Pregnancy outcome beyond 41 weeks gestation. *International Journal of Gynecology & Obstetrics*. pp. 19-24.
  206. Rouzi AA, Alsibiani S, Mansouri N, Alsinani N, Darhouse K (2014) Randomized clinical trial between hourly titrated oral misoprostol and vaginal dinoprostone for induction of labor. *American Journal of Obstetrics and Gynecology*. pp. 56.e51-56.e56.
  207. Rowlands S, Bell R, Donath S, Morrow S, Trudinger BJ (2001) Misoprostol versus dinoprostone for cervical priming prior to induction of labour in term pregnancy: a randomised controlled trial. *Australian & New Zealand Journal of Obstetrics & Gynaecology*. pp. 145-152.
  208. Rozenberg P, Chevret S, Goffinet F, Durand-Zaleski I, Ville Y, et al. (2001) Induction of labour with a viable infant: a randomised clinical trial comparing intravaginal misoprostol and intravaginal dinoprostone. *BJOG: an international journal of obstetrics and gynaecology*. pp. 1255-1262.
  209. Rozenberg P, Chevret S, Senat MV, Bretelle F, Bonnal AP, et al. (2004) A randomized trial that compared intravaginal misoprostol and dinoprostone vaginal insert in pregnancies at high risk of fetal disease. *American Journal of Obstetrics and Gynecology*. pp. 247-253.
  210. Saeed GA, Fakhar S, Nisar N, Alam AY (2011) Misoprostol for term labor induction: a randomized controlled trial. *Taiwanese Journal of Obstetrics & Gynecology*. pp. 15-19.
  211. Saggaf A, Rouzi AA, Radhan B, Alshehry S, Yamani T, et al. (2001) Misoprostol for preinduction cervical ripening and induction of labour: a randomized controlled trial. *Saudi Journal of Obstetrics & Gynecology*. pp. 89-93.
  212. Sahraoui W, Hajji S, Bibi M, Nouira M, Essaidi H, et al. (2005) Management of pregnancies beyond forty-one week's gestation with an unfavorable cervix. *Journal de Gynecologie, Obstetrique et Biologie de la Reproduction*. pp. 454-462.
  213. Sahu L, Chakraverty B (2004) Comparison of prostaglandin E1 (misoprostol) with prostaglandin E2 (dinoprostone) for labor induction. *Journal of Obstetrics and Gynecology of India*. pp. 139-142.
  214. Saleem S (2006) Efficacy of dinoprostone, intracervical foleys and misoprostol in labor induction. *Journal of the College of Physicians & Surgeons Pakistan*. pp. 276-279.
  215. Sanchez-Ramos L, Peterson DE, Delke I, Gaudier FL, Kaunitz AM (1998) Labor induction with prostaglandin E1 misoprostol compared with dinoprostone vaginal

- insert: a randomized trial. *Obstetrics & Gynecology*. pp. 401-405.
216. Sawai SK, O'Brien WF, Mastrogiannis DS, Krammer J, Mastry MG, et al. (1994) Patient-administered outpatient intravaginal prostaglandin E2 suppositories in post-date pregnancies: A double-blind, randomized, placebo-controlled study. *Obstetrics & Gynecology*. pp. 807-810.
  217. Sawai SK, Williams MC, O'Brien WF, Angel JL, Mastrogiannis DS, et al. (1991) Sequential outpatient application of intravaginal prostaglandin E2 gel in the management of postdates pregnancies. *Obstetrics & Gynecology*. pp. 19-23.
  218. Saxena P, Puri M, Bajaj M, Mishra A, Trivedi SS (2011) A randomized clinical trial to compare the efficacy of different doses of intravaginal misoprostol with intracervical dinoprostone for cervical ripening and labor induction. *European Review for Medical and Pharmacological Sciences*. pp. 759-763.
  219. Schneider M, Ramsey R, Kao L, Bennett KA (2004) Misoprostol is effective for induction of labor in high risk pregnant women: a randomized controlled trial [abstract]. *American Journal of Obstetrics and Gynecology*. pp. S73.
  220. Seeras RC (1995) Induction of labor utilizing vaginal vs intracervical prostaglandin E2. *International Journal of Gynecology & Obstetrics*. pp. 163-167.
  221. Shakya R, Shrestha J, Thapa P (2010) Safety and efficacy of misoprostol and dinoprostone as cervical ripening agents. *JNMA, Journal of the Nepal Medical Association*. pp. 33-37.
  222. Sheila CN, Mhaskar A, George S (2007) Comparison of vaginal misoprostol and oral misoprostol with intracervical dinoprostone gel for labor induction at term. *Journal of Obstetrics and Gynaecology of India*. pp. 327-330.
  223. Sheikher C, Suri N, Kholi U (2009) Comparative evaluation of oral misoprostol, vaginal misoprostol and intracervical Foley's catheter for induction of labour at term. *JK Science*. pp. 75-77.
  224. Shetty A, Danielian P, Templeton A (2001) A comparison of oral and vaginal misoprostol tablets in induction of labour at term. *BJOG: an international journal of obstetrics and gynaecology*. pp. 238-243.
  225. Shetty A, Livingstone I, Acharya S, Danielian P, Templeton A, et al. (2004) A randomised comparison of oral misoprostol and vaginal prostaglandin E2 tablets in labour induction at term. *BJOG: an international journal of obstetrics and gynaecology*. pp. 436-440.
  226. Shetty A, Livingstone I, Acharya S, Rice P, Danielian P, et al. (2003) Oral misoprostol (100 microg) versus vaginal misoprostol (25 microg) in term labor induction: a randomized comparison. *Acta Obstetrica et Gynecologica Scandinavica*. pp. 1103-1106.
  227. Shetty A, Stewart K, Stewart G, Rice P, Danielian P, et al. (2002) Active management of term prelabour rupture of membranes with oral misoprostol. *BJOG: an international journal of obstetrics and gynaecology*. pp. 1354-1358.
  228. Shoaib F (1994) Management of premature rupture of membranes with unfavourable cervix at term, by prostaglandins. *Specialist*. pp. 227-232.
  229. Sifakis S, Angelakis E, Avgoustinakis E, Fragouli Y, Mantas N, et al. (2007) A randomized comparison between intravaginal misoprostol and prostaglandin E2 for labor induction. *Archives of Gynecology and Obstetrics*. pp. 263-267.
  230. Sitthiwattanawong W, Pongsatha S (1999) Oral misoprostol for cervical ripening



- and labour induction: a randomized controlled trial. *Thai Journal of Obstetrics and Gynaecology*. pp. 87-92.
231. Smith CV, Rayburn WF, Connor RE, Fredstrom GR, Phillips CB (1990) Double-blind comparison of intravaginal prostaglandin E2 gel and 'chip' for preinduction cervical ripening. *American Journal of Obstetrics and Gynecology*. pp. 845-847.
  232. Smith CV, Rayburn WF, Miller AM (1994) Intravaginal prostaglandin E2 for cervical ripening and initiation of labor: comparison of a multidose gel and single, controlled-release pessary. *Journal of Reproductive Medicine*. pp. 381-384.
  233. Souza AS, Feitosa FE, Costa AA, Pereira AP, Carvalho AS, et al. (2013) Titrated oral misoprostol solution versus vaginal misoprostol for labor induction. *International Journal of Gynecology and Obstetrics*. pp. 207-212.
  234. Srisomboon J, Tongsong T, Tosiri V (1996) Preinduction cervical ripening with intravaginal prostaglandin E1 methyl analogue misoprostol: a randomized controlled trial. *Journal of Obstetrics and Gynaecology Research*. pp. 119-124.
  235. Stampe Sorensen S, Colov NP, Andreasson B, Bock JE, Berget A, et al. (1992) Induction of labor by vaginal prostaglandin E2. A randomized study comparing pessaries with vaginal tablets. *Acta Obstetrica et Gynecologica Scandinavica*. pp. 201-206.
  236. Stempel JE, Prins RP, Dean S (1997) Preinduction cervical ripening: A randomized prospective comparison of the efficacy and safety of intravaginal and intracervical prostaglandin E2 gel. *American Journal of Obstetrics and Gynecology*. pp. 1305-1312.
  237. Steytler P, Howarth G, Makin J (1995) Cervical ripening and labour induction. Randomised controlled trial comparing misoprostol and dinoprostone vaginal gel. *Proceedings of the 14th Conference on Priorities in Perinatal Care in South Africa; 1995 March 7-10; South Africa*. pp. 167-170.
  238. Stitely ML, Browning J, Fowler M, Gendron RT, Gherman RB (2000) Outpatient cervical ripening with intravaginal misoprostol. *Obstetrics & Gynecology*. pp. 684-688.
  239. Strobelt N, Meregalli V, Ratti M, Mariani S, Zani G, et al. (2006) Randomized study on removable PGE2 vaginal insert versus PGE2 cervical gel for cervical priming and labor induction in low-bishop-score pregnancy. *Acta Obstetrica et Gynecologica Scandinavica*. pp. 302-305.
  240. Sultana N, Rouf S, Rashid M (2006) Oral versus vaginal misoprostol for induction of labour. *Journal of Bangladesh College of Physicians and Surgeons*. pp. 44-49.
  241. Surbek DV, Boesiger H, Hoesli I, Pavic N, Holzgreve W (1997) A double-blind comparison of the safety and efficacy of intravaginal misoprostol and prostaglandin E2 to induce labor. *American Journal of Obstetrics and Gynecology*. pp. 1018-1023.
  242. Tabor B, Anderson J, Stettler B, Wetwiska N, Howard T (1995) Misoprostol vs prostaglandin E2 gel for cervical ripening. *American Journal of Obstetrics and Gynecology*. pp. 425.
  243. Taechakraichana N, Jaisamrarn U, Tannirandorn Y, Trivijitsilp P, Termrungruanglert W (1996) Induction of labour by prostaglandin E2 intracervical gel or vaginal suppository. *Thai Journal of Obstetrics and Gynaecology*. pp. 9-14.
  244. Taher S, Inder J, Soltan S, Eliahoo J, Edmonds D, et al. (2011) Prostaglandin E2

- vaginal gel or tablets for the induction of labour at term: a randomised controlled trial. *BJOG: an international journal of obstetrics and gynaecology*. pp. 719-725.
245. Tan TC, Yan SY, Chua TM, Biswas A, Chong YS (2010) A randomised controlled trial of low-dose misoprostol and dinoprostone vaginal pessaries for cervical priming. *BJOG: an international journal of obstetrics & gynaecology*. pp. 1270-1277.
  246. Tessier F, Danserau J (1997) Oral misoprostol versus vaginal dinoprostone for labor induction: a double-blind randomized controlled trial. Personal communication.
  247. Tey A, Eriksen NL, Blanco JD (1995) A prospective randomized trial of induction vs expectant management in nondiabetic pregnancies with fetal macrosomia. *American Journal of Obstetrics and Gynecology*. pp. 293.
  248. Thaisomboon A, Russameecharoen K, Wanitpongpan P, Phattanachindakun B, Changnoi A (2012) Comparison of the efficacy and safety of titrated oral misoprostol and a conventional oral regimen for cervical ripening and labor induction. *International Journal of Gynecology and Obstetrics*. pp. 13-16.
  249. Thavarasah AS, Arulkumaran S, Almohdzar SA (1990) A prospective randomized study comparing the effect of intracervical to intravaginal administration of prostaglandin E2, in patients with poor cervical scores at term. *International Journal of Feto-Maternal Medicine*. pp. 177-181.
  250. Thiery M, Decoster JM, Parewijck W, Noah ML, Derom R, et al. (1984) Endocervical prostaglandin E2 gel for preinduction cervical softening. *Prostaglandins*. pp. 429-439.
  251. Thomas N, Longo SA, Rumney PJ, Nageotte MP, Asrat T (2000) Intravaginal misoprostol in prelabor rupture of membranes at term. *American Journal of Obstetrics and Gynecology*. pp. S136.
  252. Tomlinson AJ, Archer PA, Hobson S (2001) Induction of labour: a comparison of two methods with particular concern to patient acceptability. *Journal of Obstetrics and Gynaecology*. pp. 239-241.
  253. Topozada MK, Anwar MYM, Hassan HA, El-Gazaerly WS (1997) Oral or vaginal misoprostol for induction of labor. *International Journal of Gynecology & Obstetrics*. pp. 135-139.
  254. Trabelsi H, Mathlouthi N, Zayen S, Dhouib M, Chaabene K, et al. (2012) [Cervical ripening at term. A randomized and prospective study: Misoprotol versus dinoprostone]. [French]. *Tunisie Medicale*. pp. 362-369.
  255. Triglia MT, Palamara F, Lojacono A, Prefumo F, Frusca T (2010) A randomized controlled trial of 24-hour vaginal dinoprostone pessary compared to gel for induction of labor in term pregnancies with a Bishop score < or = 4. *Acta Obstetrica et Gynecologica Scandinavica*. pp. 651-657.
  256. Trofatter K, Bowers D, Gall SA, Killam AP (1985) Preinduction cervical ripening with prostaglandin E2 (prepidil) gel. *American Journal of Obstetrics and Gynecology*. pp. 268-271.
  257. Trofatter KF (1993) Effect of preinduction cervical softening with dinoprostone gel on outcome of oxytocin-induced labor. *Clinical Therapeutics*. pp. 838-844.
  258. Troostwijk AL, Van Veen JBC, Doesburg WH (1992) Pre-induction intracervical application of a highly viscous prostaglandin E2 gel in pregnant women with an

- unripe uterine cervix: a double-blind placebo-controlled trial. *European Journal of Obstetrics & Gynecology and Reproductive Biology*. pp. 105-111.
259. Ulmsten U, Ekman G, Belfrage P, Bygdeman M, Nyberg C (1985) Intracervical vs intravaginal PGE2 for induction of labor at term in patients with an unfavorable cervix. *Archives of Gynecology*. pp. 243-248.
  260. Ulmsten U, Wingerup L, Belfrage P, Ekman G, Wiquist N (1982) Intracervical application of prostaglandin gel for induction of term labor. *Obstetrics & Gynecology*. pp. 336-339.
  261. Uludag S, Saricali FS, Madazli R, Cepni I (2005) A comparison of oral and vaginal misoprostol for induction of labour. *European Journal of Obstetrics & Gynecology and Reproductive Biology*. pp. 57-60.
  262. van Gemund N, Scherjon S, LeCessie S, van Leeuwen JH, van Roosmalen J, et al. (2004) A randomised trial comparing low dose vaginal misoprostol and dinoprostone for labour induction. *BJOG: an International Journal of Obstetrics & Gynaecology*. pp. 42-49.
  263. Varaklis K, Gumina R, Stubblefield PG (1995) Randomised controlled trial of vaginal misoprostol and intracervical prostaglandin E2 gel for induction of labor at term. *Obstetrics & Gynecology*. pp. 541-544.
  264. Wang H, Li L, Pu L (1998) The effect of 25 micrograms misoprostol on induction of labor in late pregnancy. *Chung-Hua Fu Chan Ko Tsa Chih [Chinese Journal of Obstetrics & Gynecology]*. pp. 469-471.
  265. Wieland D, Friedman F, Jr. (1999) Comparing two dinoprostone agents for preinduction cervical ripening at term A randomized trial. *Journal of Reproductive Medicine*. pp. 724-728.
  266. Wielgos M, Szymusik I, Kosinska-Kaczynska K, Suchonska B, Kaminski P, et al. (2007) The influence of dinoprostone on uterine cervix ripening and the course of labor. *Neuroendocrinology Letters*. pp. 513-517.
  267. Wing DA, Brown R, Plante LA, Miller H, Rugarn O, et al. (2013) Misoprostol vaginal insert and time to vaginal delivery: a randomized controlled trial. *Obstetrics and Gynecology*. pp. 201-209.
  268. Wing DA, for the Misoprostol Vaginal Insert C (2008) Misoprostol vaginal insert compared with dinoprostone vaginal insert: a randomized controlled trial. *Obstetrics & Gynecology*. pp. 801-812.
  269. Wing DA, Ham D, Paul RH (1999) A comparison of orally administered misoprostol with vaginally administered misoprostol for cervical ripening and labor induction. *American Journal of Obstetrics and Gynecology*. pp. 1155-1160.
  270. Wing DA, Jones MM, Rahall A, Goodwin TM, Paul RH (1995) A comparison of misoprostol and prostaglandin E2 gel for preinduction cervical ripening and labor induction. *American Journal of Obstetrics and Gynecology*. pp. 1804-1810.
  271. Wing DA, Ortiz Omphroy G, Paul RH (1997) A comparison of intermittent vaginal administration of misoprostol with continuous dinoprostone for cervical ripening and labor induction. *American Journal of Obstetrics and Gynecology*. pp. 612-618.
  272. Wing DA, Park MR, Paul RH (2000) A randomized comparison of oral and intravaginal misoprostol for labor induction. *Obstetrics & Gynecology*. pp. 905-908.

273. Wing DA, Rahall A, Jones MM, Goodwin TM, Paul RH (1995) Misoprostol: an effective agent for cervical ripening and labor induction. *American Journal of Obstetrics and Gynecology*. pp. 1811-1816.
274. Witter FR, Mercer BM (1996) Improved intravaginal controlled-release prostaglandin E2 insert for cervical ripening at term The Prostaglandin E2 insert Study Group. *Journal of Maternal Fetal Medicine*. pp. 64-69.
275. Witter FR, Rocco LE, Johnson TRB (1992) A randomized trial of prostaglandin E2 in a controlled-release vaginal pessary for cervical ripening at term. *American Journal of Obstetrics and Gynecology*. pp. 830-834.
276. Yazdani SH, Bouzari Z, Farahi S, Tabary AM (2012) Oral misoprostol with oxytocin versus oxytocin alone for labor induction in pre-labor rupture of membranes (PROM) at term pregnancy. *Journal of Babol University of Medical Sciences*. pp. 7-12.
277. Yuen PM, Pang HYY, Chung T, Chang A (1996) Cervical ripening before induction of labour in patients with an unfavourable cervix: a comparative randomized study of the atad ripener device, prostaglandin E2 vaginal pessary, and prostaglandin E2 intracervical gel. *Australian and New Zealand Journal of Obstetrics and Gynaecology*. pp. 291-295.
278. Zanconato G, Bergamini V, Mantovani E, Carlin R, Bortolami O, et al. (2011) Induction of labor and pain: a randomized trial between two vaginal preparations of dinoprostone in nulliparous women with an unfavorable cervix. *Journal of Maternal-Fetal and Neonatal Medicine*. pp. 728-731.
279. Zanini A, Norchi S, Beretta E, Cortinovis I, Fenaroli G, et al. (1989) Cervical ripening and induction of labor in term pregnancy using prostaglandin E2. Controlled clinical study comparing the intracervical and intravaginal routes. *Annali di Ostetricia, Ginecologia, Medicina Perinatale*. pp. 209-216.
280. Zvandasara P, Saungweme G, Mlambo J, Chidembo W, Madzivanzira N, et al. (2008) Induction of labour with titrated oral misoprostol suspension. A comparative study with vaginal misoprostol. *Central African Journal of Medicine*. pp. 43-49.
