# Supplementary material
Source: PubMed Central journal article supplement (PMC4794072)
Supplement: alfz022734.w4_default.pdf [file alfz022734.w4_default.pdf]

## Appendix 4. Included Study Characteristics and Effect Modifiers

| Study Identifier | Comparison                                                                                | Sample size | Previous CS             | Parity                  | Membranes               | Cervix                  | Gestational age          | No. Foetuses | Risk of Bias                                                                        | Setting                  | Financial Disclosure     |
|------------------|-------------------------------------------------------------------------------------------|-------------|-------------------------|-------------------------|-------------------------|-------------------------|--------------------------|--------------|-------------------------------------------------------------------------------------|--------------------------|--------------------------|
| Adair 1998       | Vaginal misoprostol (Dose 50 mcg or more) vs Oral misoprostol tablet (dose 50mcg or more) | 178         | None with previous CS   | Mixed parity            | All intact              | All unfavourable (<6)   | Mixed (includes preterm) | Singleton    | Report describes allocation concealment. Low risk of bias.                          | Inpatient.               | Not reported/ not clear. |
| Adam 2005        | Vaginal misoprostol (Dose 50 mcg or more) vs Oral misoprostol tablet (dose 50mcg or more) | 80          | None with previous CS   | Mixed parity            | Not reported/ not clear | All unfavourable (<6)   | Not reported/ not clear  | Singleton    | No description of allocation concealment or unclear description. High risk of bias. | Inpatient.               | Not reported/ not clear. |
| Agarwal 2003     | Intracervical PGE2 vs Vaginal misoprostol (Dose 50 mcg or more)                           | 120         | None with previous CS   | Mixed parity            | All intact              | All favourable (>6)     | Mixed (includes preterm) | Singleton    | No description of allocation concealment or unclear description. High risk of bias. | Inpatient.               | Not reported/ not clear. |
| Al-Malt 1995     | Placebo vs Vaginal PGE2 (gel)                                                             | 103         | Not reported/ not clear | Not reported/ not clear | Not reported/ not clear | All unfavourable (<6)   | All > 37 weeks           | Singleton    | No description of allocation concealment or unclear description. High risk of bias. | Not reported/ not clear. | Not reported/ not clear. |
| Al-Sebai 1992    | Vaginal PGE2 (tablet) vs Vaginal PGE2 (gel)                                               | 73          | None with previous CS   | Nulliparous only        | Not reported/ not clear | All unfavourable (<6)   | All > 37 weeks           | Singleton    | No description of allocation concealment or unclear description. High risk of bias. | Not reported/ not clear. | Not reported/ not clear. |
| Anand 2012       | Intracervical PGE2 vs Vaginal misoprostol (Dose less than 50 mcg)                         | 200         | None with previous CS   | Mixed parity            | Not reported/ not clear | All unfavourable (<6)   | All > 37 weeks           | Singleton    | No description of allocation concealment or unclear description. High risk of bias. | Inpatient.               | Not reported/ not clear. |
| Ayad 2002        | Intracervical PGE2 vs Vaginal misoprostol (Dose 50 mcg or more)                           | 238         | None with previous CS   | Mixed parity            | All ruptured            | Mixed                   | Mixed (includes preterm) | Singleton    | No description of allocation concealment or unclear description. High risk of bias. | Inpatient.               | Not reported/ not clear. |
| Ayaz 2008        | No treatment vs Oral misoprostol tablet (dose 50mcg or more)                              | 84          | None with previous CS   | Multiparous only        | All ruptured            | Not reported/ not clear | All > 37 weeks           | Singleton    | No description of allocation concealment or unclear description. High risk of bias. | Inpatient.               | Not reported/ not clear. |
| Ayaz 2010        | Vaginal PGE2 (tablet) vs Vaginal misoprostol (Dose 50 mcg or more)                        | 120         | None with previous CS   | Nulliparous only        | All intact              | All unfavourable (<6)   | All > 37 weeks           | Singleton    | Report describes allocation concealment. Low risk of bias.                          | Inpatient.               | Not reported/ not clear. |
| Bartha 2000      | Intracervical PGE2 vs Oral misoprostol tablet (dose 50mcg or more)                        | 200         | Some with previous CS   | Mixed parity            | All intact              | All unfavourable (<6)   | All > 37 weeks           | Singleton    | Report describes allocation concealment. Low risk of bias.                          | Inpatient.               | Not reported/ not clear. |
| Beigi 2003       | Placebo vs Oral misoprostol tablet (dose 50mcg or more)                                   | 156         | None with previous CS   | Mixed parity            | Mixed                   | All unfavourable (<6)   | All > 37 weeks           | Singleton    | Report describes allocation concealment. Low risk of bias.                          | Inpatient.               | Not reported/ not clear. |

|                   |                                                                                           |     |                         |                         |                         |                         |                          |                         |                                                                                     |                              |                                                              |
|-------------------|-------------------------------------------------------------------------------------------|-----|-------------------------|-------------------------|-------------------------|-------------------------|--------------------------|-------------------------|-------------------------------------------------------------------------------------|------------------------------|--------------------------------------------------------------|
| Bennett 1998      | Vaginal misoprostol (Dose 50 mcg or more) vs Oral misoprostol tablet (dose 50mcg or more) | 206 | None with previous CS   | Mixed parity            | All intact              | Mixed                   | All > 37 weeks           | Singleton               | Report describes allocation concealment. Low risk of bias.                          | Inpatient.                   | No pharmaceutical industry funding/ no conflicts of interest |
| Bernstein 1991    | Placebo vs Intracervical PGE2                                                             | 397 | None with previous CS   | Mixed parity            | All intact              | All unfavourable (<6)   | Mixed (includes preterm) | Not reported/ not clear | Report describes allocation concealment. Low risk of bias.                          | Inpatient.                   | Some or all funding from pharmaceutical industry             |
| Berzircioglu 2012 | No treatment vs Vaginal PGE2 (pessary - slow release)                                     | 100 | None with previous CS   | Mixed parity            | All ruptured            | All unfavourable (<6)   | All > 37 weeks           | Singleton               | Report describes allocation concealment. Low risk of bias.                          | Inpatient.                   | Not reported/ not clear.                                     |
| Bounyasong 2000   | Vaginal misoprostol (Dose less than 50 mcg) vs Vaginal misoprostol (Dose 50 mcg or more)  | 166 | None with previous CS   | Mixed parity            | All intact              | Not reported/ not clear | All > 37 weeks           | Singleton               | No description of allocation concealment or unclear description. High risk of bias. | Inpatient.                   | Not reported/ not clear.                                     |
| Buchanan 1984     | Placebo vs Vaginal PGE2 pessary (normal release)                                          | 77  | None with previous CS   | Mixed parity            | Not reported/ not clear | All unfavourable (<6)   | Mixed (includes preterm) | Singleton               | No description of allocation concealment or unclear description. High risk of bias. | Inpatient.                   | Not reported/ not clear.                                     |
| Buser 1997        | Intracervical PGE2 vs Vaginal misoprostol (Dose 50 mcg or more)                           | 155 | None with previous CS   | Mixed parity            | All intact              | All unfavourable (<6)   | All > 37 weeks           | Singleton               | Report describes allocation concealment. Low risk of bias.                          | Inpatient.                   | Not reported/ not clear.                                     |
| Buttino 1990      | Placebo vs Intracervical PGE2                                                             | 43  | Not reported/ not clear | All post-term            | Not reported/ not clear | Report describes allocation concealment. Low risk of bias.                          | One or both arms outpatient. | Not reported/ not clear.                                     |
| Cabrol 1988       | Placebo vs Intracervical PGE2                                                             | 217 | Not reported/ not clear | Mixed parity            | All intact              | All unfavourable (<6)   | All > 37 weeks           | Singleton               | Report describes allocation concealment. Low risk of bias.                          | Inpatient.                   | Not reported/ not clear.                                     |
| Campbell 1984     | Placebo vs Vaginal PGE2 pessary (normal release) vs                                       | 199 | Not reported/ not clear | Mixed parity            | Mixed                   | Mixed                   | Mixed (includes preterm) | Not reported/ not clear | No description of allocation concealment or unclear description. High risk of bias. | Inpatient.                   | Not reported/ not clear.                                     |
| Cararach 1996     | No treatment vs Intracervical PGE2                                                        | 341 | Not reported/ not clear | Not reported/ not clear | All ruptured            | All unfavourable (<6)   | Mixed (includes preterm) | Not reported/ not clear | Report describes allocation concealment. Low risk of bias.                          | Inpatient.                   | No pharmaceutical industry funding/ no conflicts of interest |

|                 |                                                                                              |      |                            |                            |                            |                       |                          |                            |                                                                                     |            |                                                              |
|-----------------|----------------------------------------------------------------------------------------------|------|----------------------------|----------------------------|----------------------------|-----------------------|--------------------------|----------------------------|-------------------------------------------------------------------------------------|------------|--------------------------------------------------------------|
| Cardozo 1986    | No treatment vs Vaginal PGE2 pessary (normal release)                                        | 402  | Not reported/<br>not clear | Not reported/<br>not clear | All intact                 | Mixed                 | All post-term            | Not reported/<br>not clear | No description of allocation concealment or unclear description. High risk of bias. | Inpatient. | Not reported/<br>not clear.                                  |
| Carlan 2001     | Vaginal misoprostol (Dose 50 mcg or more) vs Oral misoprostol tablet (dose 50mcg or more)    | 1004 | Some with previous CS      | Mixed parity               | Not reported/<br>not clear | All unfavourable (<6) | Mixed (includes preterm) | Singleton                  | Report describes allocation concealment. Low risk of bias.                          | Inpatient. | Not reported/<br>not clear.                                  |
| Chang 1997 9474 | Vaginal PGE2 (tablet) vs Vaginal misoprostol (Dose 50 mcg or more)                           | 60   | None with previous CS      | Nulliparous only           | All intact                 | All unfavourable (<6) | All > 37 weeks           | Singleton                  | No description of allocation concealment or unclear description. High risk of bias. | Inpatient. | No pharmaceutical industry funding/ no conflicts of interest |
| Charoenkul 2000 | Vaginal PGE2 (tablet) vs Vaginal misoprostol (Dose 50 mcg or more)                           | 143  | None with previous CS      | Mixed parity               | Not reported/<br>not clear | All unfavourable (<6) | All > 37 weeks           | Singleton                  | No description of allocation concealment or unclear description. High risk of bias. | Inpatient. | Not reported/<br>not clear.                                  |
| Chatterjee 1990 | Placebo vs Vaginal PGE2 (gel)                                                                | 33   | Not reported/<br>not clear | Mixed parity               | Not reported/<br>not clear | All unfavourable (<6) | Mixed (includes preterm) | Not reported/<br>not clear | Report describes allocation concealment. Low risk of bias.                          | Inpatient. | Not reported/<br>not clear.                                  |
| Chaudhuri 2011  | Vaginal PGE2 (gel) vs Vaginal misoprostol (Dose less than 50 mcg)                            | 207  | None with previous CS      | Mixed parity               | All ruptured               | Mixed                 | All > 37 weeks           | Not reported/<br>not clear | Report describes allocation concealment. Low risk of bias.                          | Inpatient. | No pharmaceutical industry funding/ no conflicts of interest |
| Cheng 2008      | Vaginal misoprostol (Dose less than 50 mcg) vs Titrated (low dose) oral misoprostol solution | 207  | None with previous CS      | Mixed parity               | Mixed                      | All unfavourable (<6) | Mixed (includes preterm) | Singleton                  | Report describes allocation concealment. Low risk of bias.                          | Inpatient. | No pharmaceutical industry funding/ no conflicts of interest |
| Cheung 2006     | Placebo vs Oral misoprostol tablet (dose 50mcg or more)                                      | 98   | None with previous CS      | Nulliparous only           | All ruptured               | Mixed                 | All > 37 weeks           | Singleton                  | Report describes allocation concealment. Low risk of bias.                          | Inpatient. | Not reported/<br>not clear.                                  |
| Chitraker 2012  | Intracervical PGE2 vs Vaginal misoprostol (Dose less than 50 mcg)                            | 200  | None with previous CS      | Mixed parity               | All intact                 | All unfavourable (<6) | All > 37 weeks           | Singleton                  | No description of allocation concealment or unclear description. High risk of bias. | Inpatient. | Not reported/<br>not clear.                                  |
| Chua 1995       | Placebo vs Vaginal PGE2 pessary (normal release)                                             | 155  | None with previous CS      | Nulliparous only           | All ruptured               | All unfavourable (<6) | All > 37 weeks           | Not reported/<br>not clear | Report describes allocation concealment. Low risk of bias.                          | Inpatient. | Not reported/<br>not clear.                                  |

|                 |                                                                                             |     |                         |              |                         |                         |                          |                         |                                                                                     |                              |                                                              |
|-----------------|---------------------------------------------------------------------------------------------|-----|-------------------------|--------------|-------------------------|-------------------------|--------------------------|-------------------------|-------------------------------------------------------------------------------------|------------------------------|--------------------------------------------------------------|
| Chuck 1995      | Intracervical PGE2 vs Vaginal misoprostol (Dose 50 mcg or more)                             | 99  | Some with previous CS   | Mixed parity | Mixed                   | Mixed                   | Mixed (includes preterm) | Singleton               | Report describes allocation concealment. Low risk of bias.                          | Inpatient.                   | Not reported/ not clear.                                     |
| Chung 1992      | Placebo vs Vaginal PGE2 (gel)                                                               | 59  | Not reported/ not clear | Mixed parity | All ruptured            | All unfavourable (<6)   | All > 37 weeks           | Singleton               | Report describes allocation concealment. Low risk of bias.                          | Inpatient.                   | Not reported/ not clear.                                     |
| Chyu 1997       | Vaginal PGE2 (pessary - slow release) vs Intracervical PGE2                                 | 73  | Not reported/ not clear | Mixed parity | Mixed                   | Mixed                   | Not reported/ not clear  | Not reported/ not clear | No description of allocation concealment or unclear description. High risk of bias. | Inpatient.                   | Not reported/ not clear.                                     |
| Clark 1998      | Intracervical PGE2 vs Vaginal misoprostol (Dose less than 50 mcg)                           | 138 | None with previous CS   | Mixed parity | Not reported/ not clear | All unfavourable (<6)   | Not reported/ not clear  | Singleton               | No description of allocation concealment or unclear description. High risk of bias. | Inpatient.                   | Not reported/ not clear.                                     |
| Colon 2005      | Vaginal misoprostol (Dose less than 50 mcg) vs Oral misoprostol tablet (dose 50mcg or more) | 204 | None with previous CS   | Mixed parity | Mixed                   | All unfavourable (<6)   | Mixed (includes preterm) | Not reported/ not clear | Report describes allocation concealment. Low risk of bias.                          | Inpatient.                   | Not reported/ not clear.                                     |
| Corrado 2001    | Vaginal PGE2 (gel) vs Intracervical PGE2                                                    | 233 | None with previous CS   | Mixed parity | All intact              | All unfavourable (<6)   | Mixed (includes preterm) | Not reported/ not clear | No description of allocation concealment or unclear description. High risk of bias. | Inpatient.                   | Not reported/ not clear.                                     |
| Curet 1989      | Placebo vs Vaginal PGE2 (gel)                                                               | 54  | Not reported/ not clear | Mixed parity | All intact              | All unfavourable (<6)   | Mixed (includes preterm) | Singleton               | Report describes allocation concealment. Low risk of bias.                          | Inpatient.                   | No pharmaceutical industry funding/ no conflicts of interest |
| Da Graca 2005   | No treatment vs Vaginal misoprostol (Dose less than 50 mcg)                                 | 150 | None with previous CS   | Mixed parity | All ruptured            | Not reported/ not clear | All > 37 weeks           | Singleton               | Report describes allocation concealment. Low risk of bias.                          | Inpatient.                   | Not reported/ not clear.                                     |
| Dallenbach 2003 | Vaginal PGE2 (gel) vs Oral misoprostol tablet (Dose less than 50 mcg)                       | 200 | None with previous CS   | Mixed parity | Mixed                   | All unfavourable (<6)   | All > 37 weeks           | Singleton               | Report describes allocation concealment. Low risk of bias.                          | Inpatient.                   | Not reported/ not clear.                                     |
| Danielian 1999  | Vaginal PGE2 (gel) vs Vaginal misoprostol (Dose 50 mcg or more)                             | 211 | Some with previous CS   | Mixed parity | All intact              | All unfavourable (<6)   | All > 37 weeks           | Singleton               | Report describes allocation concealment. Low risk of bias.                          | Inpatient.                   | Not reported/ not clear.                                     |
| Darroca 1996    | Placebo vs Intracervical PGE2                                                               | 118 | None with previous CS   | Mixed parity | Not reported/ not clear | All unfavourable (<6)   | Mixed (includes preterm) | Not reported/ not clear | Report describes allocation concealment. Low risk of bias.                          | One or both arms outpatient. | Not reported/ not clear.                                     |

|                |                                                                                                          |     |                            |                            |                            |                       |                            |                            |                                                                                     |                              |                                                              |
|----------------|----------------------------------------------------------------------------------------------------------|-----|----------------------------|----------------------------|----------------------------|-----------------------|----------------------------|----------------------------|-------------------------------------------------------------------------------------|------------------------------|--------------------------------------------------------------|
| Deng 1999      | Placebo vs Vaginal misoprostol (Dose 50 mcg or more)                                                     | 85  | Not reported/<br>not clear | Not reported/<br>not clear | Not reported/<br>not clear | All unfavourable (<6) | Not reported/<br>not clear | Not reported/<br>not clear | Report describes allocation concealment. Low risk of bias.                          | Inpatient.                   | Not reported/<br>not clear.                                  |
| Denguezli 2007 | Intracervical PGE2 vs Vaginal misoprostol (Dose 50 mcg or more) vs Mechanical methods - foley catheter   | 130 | None with previous CS      | Mixed parity               | All intact                 | All unfavourable (<6) | All > 37 weeks             | Singleton                  | No description of allocation concealment or unclear description. High risk of bias. | Inpatient.                   | No pharmaceutical industry funding/ no conflicts of interest |
| Deo 2012       | Vaginal PGE2 (gel) vs Vaginal misoprostol (Dose less than 50 mcg) vs Mechanical methods - foley catheter | 158 | Not reported/<br>not clear | Mixed parity               | All intact                 | All unfavourable (<6) | Mixed (includes preterm)   | Singleton                  | Report describes allocation concealment. Low risk of bias.                          | Inpatient.                   | Not reported/<br>not clear.                                  |
| Diro 1999      | Vaginal misoprostol (Dose less than 50 mcg) vs Vaginal misoprostol (Dose 50 mcg or more)                 | 251 | None with previous CS      | Mixed parity               | Not reported/<br>not clear | All unfavourable (<6) | Mixed (includes preterm)   | Singleton                  | Report describes allocation concealment. Low risk of bias.                          | Inpatient.                   | Not reported/<br>not clear.                                  |
| Doany 1997     | Placebo vs Vaginal PGE2 (gel) vs Membrane sweeping                                                       | 115 | None with previous CS      | Mixed parity               | All intact                 | Mixed                 | All post-term              | Singleton                  | Report describes allocation concealment. Low risk of bias.                          | Inpatient.                   | Not reported/<br>not clear.                                  |
| Dodd 2006      | Vaginal PGE2 (gel) vs Titrated (low dose) oral misoprostol solution                                      | 741 | None with previous CS      | Mixed parity               | All intact                 | All unfavourable (<6) | All > 37 weeks             | Singleton                  | Report describes allocation concealment. Low risk of bias.                          | Inpatient.                   | No pharmaceutical industry funding/ no conflicts of interest |
| Domisse 1980   | Placebo vs Vaginal PGE2 (tablet)                                                                         | 56  | Not reported/<br>not clear | Mixed parity               | All intact                 | All favourable (>6)   | Mixed (includes preterm)   | Not reported/<br>not clear | No description of allocation concealment or unclear description. High risk of bias. | Inpatient.                   | Not reported/<br>not clear.                                  |
| Dyar 2000      | Vaginal misoprostol (Dose 50 mcg or more) vs Oral misoprostol tablet (dose 50mcg or more)                | 153 | None with previous CS      | Not reported/<br>not clear | Not reported/<br>not clear | All unfavourable (<6) | All > 37 weeks             | Singleton                  | No description of allocation concealment or unclear description. High risk of bias. | Inpatient.                   | Not reported/<br>not clear.                                  |
| Egarter 1989   | No treatment vs Vaginal PGE2 (tablet)                                                                    | 345 | None with previous CS      | Mixed parity               | All intact                 | Mixed                 | All > 37 weeks             | Singleton                  | No description of allocation concealment or unclear description. High risk of bias. | One or both arms outpatient. | Not reported/<br>not clear.                                  |

|                  |                                                                                                                            |     |                            |                            |                            |                            |                            |                            |                                                                                     |            |                             |
|------------------|----------------------------------------------------------------------------------------------------------------------------|-----|----------------------------|----------------------------|----------------------------|----------------------------|----------------------------|----------------------------|-------------------------------------------------------------------------------------|------------|-----------------------------|
| Ekman 1983       | Vaginal PGE2 (gel) vs Intracervical PGE2                                                                                   | 60  | Not reported/<br>not clear | Mixed parity               | All intact                 | All unfavourable (<6)      | All > 37 weeks             | Not reported/<br>not clear | No description of allocation concealment or unclear description. High risk of bias. | Inpatient. | Not reported/<br>not clear. |
| El-Din 2000      | Vaginal PGE2 (tablet) vs Intracervical PGE2 vs Vaginal misoprostol (Dose 50 mcg or more)                                   | 149 | Not reported/<br>not clear | Not reported/<br>not clear | Not reported/<br>not clear | All unfavourable (<6)      | Not reported/<br>not clear | Not reported/<br>not clear | No description of allocation concealment or unclear description. High risk of bias. | Inpatient. | Not reported/<br>not clear. |
| Elhassan 2004    | Vaginal PGE2 (tablet) vs Vaginal misoprostol (Dose 50 mcg or more)                                                         | 120 | None with previous CS      | Mixed parity               | Not reported/<br>not clear | Not reported/<br>not clear | Not reported/<br>not clear | Singleton                  | No description of allocation concealment or unclear description. High risk of bias. | Inpatient. | Not reported/<br>not clear. |
| Elhassan 2005    | Vaginal misoprostol (Dose less than 50 mcg) vs Vaginal misoprostol (Dose 50 mcg or more)                                   | 63  | None with previous CS      | Mixed parity               | All intact                 | All unfavourable (<6)      | Not reported/<br>not clear | Singleton                  | No description of allocation concealment or unclear description. High risk of bias. | Inpatient. | Not reported/<br>not clear. |
| Elhassan 2007    | Vaginal misoprostol (Dose 50 mcg or more) vs Oral misoprostol tablet (dose 50mcg or more) vs Buccal/sublingual misoprostol | 150 | None with previous CS      | Mixed parity               | Not reported/<br>not clear | All unfavourable (<6)      | Not reported/<br>not clear | Singleton                  | No description of allocation concealment or unclear description. High risk of bias. | Inpatient. | Not reported/<br>not clear. |
| El-Mardi 1991    | Vaginal PGE2 (tablet) vs Vaginal PGE2 pessary (normal release)                                                             | 200 | Not reported/<br>not clear | Mixed parity               | All intact                 | All unfavourable (<6)      | All > 37 weeks             | Singleton                  | No description of allocation concealment or unclear description. High risk of bias. | Inpatient. | Not reported/<br>not clear. |
| El-Shawarby 2006 | Vaginal PGE2 (gel) vs Vaginal PGE2 (pessary - slow release)                                                                | 72  | Not reported/<br>not clear | Mixed parity               | Mixed                      | Mixed                      | All > 37 weeks             | Singleton                  | Report describes allocation concealment. Low risk of bias.                          | Inpatient. | Not reported/<br>not clear. |
| El-Sherbiny 2001 | Vaginal misoprostol (Dose less than 50 mcg) vs Vaginal misoprostol (Dose 50 mcg or more)                                   | 185 | None with previous CS      | Mixed parity               | All intact                 | Mixed                      | All > 37 weeks             | Singleton                  | No description of allocation concealment or unclear description. High risk of bias. | Inpatient. | Not reported/<br>not clear. |
| Eroglu 2007      | Vaginal misoprostol (Dose less than 50 mcg) vs Vaginal misoprostol (Dose 50 mcg or more)                                   | 147 | None with previous CS      | Mixed parity               | Mixed                      | All unfavourable (<6)      | All > 37 weeks             | Singleton                  | No description of allocation concealment or unclear description. High risk of bias. | Inpatient. | Not reported/<br>not clear. |
| Facchinetti 2005 | Vaginal PGE2 (pessary - slow release) vs Intracervical PGE2                                                                | 144 | None with previous CS      | Nulliparous only           | All intact                 | All unfavourable (<6)      | All > 37 weeks             | Singleton                  | No description of allocation concealment or unclear description. High risk of bias. | Inpatient. | Not reported/<br>not clear. |
| Fachinetti 2007  | Vaginal PGE2 (pessary - slow release) vs Intracervical PGE2                                                                | 116 | None with previous CS      | Nulliparous only           | All intact                 | All unfavourable (<6)      | All post-term              | Singleton                  | No description of allocation concealment or unclear description. High risk of bias. | Inpatient. | Not reported/<br>not clear. |

|                |                                                                                                                 |     |                         |                         |                         |                         |                          |                         |                                                                                     |            |                                                              |
|----------------|-----------------------------------------------------------------------------------------------------------------|-----|-------------------------|-------------------------|-------------------------|-------------------------|--------------------------|-------------------------|-------------------------------------------------------------------------------------|------------|--------------------------------------------------------------|
| Farah 1997     | Vaginal misoprostol (Dose less than 50 mcg) vs Vaginal misoprostol (Dose 50 mcg or more)                        | 399 | None with previous CS   | Mixed parity            | Mixed                   | All unfavourable (<6)   | Mixed (includes preterm) | Singleton               | Report describes allocation concealment. Low risk of bias.                          | Inpatient. | Not reported/ not clear.                                     |
| Ferraiolo 2010 | Vaginal PGE2 (gel) vs Vaginal PGE2 (pessary - slow release)                                                     | 144 | None with previous CS   | Nulliparous only        | All intact              | All unfavourable (<6)   | All > 37 weeks           | Not reported/ not clear | No description of allocation concealment or unclear description. High risk of bias. | Inpatient. | No pharmaceutical industry funding/ no conflicts of interest |
| Fisher 2001    | Vaginal misoprostol (Dose 50 mcg or more) vs Oral misoprostol tablet (dose 50mcg or more)                       | 126 | None with previous CS   | Mixed parity            | All intact              | Mixed                   | Mixed (includes preterm) | Singleton               | Report describes allocation concealment. Low risk of bias.                          | Inpatient. | No pharmaceutical industry funding/ no conflicts of interest |
| Fletcher 1993  | Placebo vs Vaginal misoprostol (Dose 50 mcg or more)                                                            | 45  | Not reported/ not clear | Mixed parity            | Not reported/ not clear | Not reported/ not clear | Mixed (includes preterm) | Not reported/ not clear | Report describes allocation concealment. Low risk of bias.                          | Inpatient. | Not reported/ not clear.                                     |
| Fletcher 1994  | Vaginal PGE2 (tablet) vs Vaginal misoprostol (Dose 50 mcg or more)                                              | 63  | None with previous CS   | Mixed parity            | All intact              | Mixed                   | Not reported/ not clear  | Singleton               | No description of allocation concealment or unclear description. High risk of bias. | Inpatient. | Not reported/ not clear.                                     |
| Frass 2011     | No treatment vs Vaginal misoprostol (Dose 50 mcg or more)                                                       | 113 | None with previous CS   | Mixed parity            | All intact              | All unfavourable (<6)   | Mixed (includes preterm) | Singleton               | No description of allocation concealment or unclear description. High risk of bias. | Inpatient. | No pharmaceutical industry funding/ no conflicts of interest |
| Frohn 2002     | Vaginal PGE2 (gel) vs Vaginal misoprostol (Dose 50 mcg or more)                                                 | 109 | Some with previous CS   | Mixed parity            | All ruptured            | All unfavourable (<6)   | Mixed (includes preterm) | Singleton               | Report describes allocation concealment. Low risk of bias.                          | Inpatient. | Not reported/ not clear.                                     |
| Garry 2003     | Vaginal PGE2 (pessary - slow release) vs Vaginal misoprostol (Dose 50 mcg or more)                              | 186 | Some with previous CS   | Mixed parity            | Mixed                   | All unfavourable (<6)   | Mixed (includes preterm) | Singleton               | Report describes allocation concealment. Low risk of bias.                          | Inpatient. | Not reported/ not clear.                                     |
| Gelisen 2005   | No treatment vs Vaginal misoprostol (Dose 50 mcg or more) vs IV oxytocin vs Mechanical methods - foley catheter | 600 | None with previous CS   | Mixed parity            | All intact              | All unfavourable (<6)   | All post-term            | Singleton               | Report describes allocation concealment. Low risk of bias.                          | Inpatient. | Not reported/ not clear.                                     |
| Getgan 2003    | Vaginal misoprostol (Dose less than 50 mcg) vs Oral misoprostol tablet (dose 50mcg or more)                     | 72  | Not reported/ not clear | Not reported/ not clear | All intact              | All unfavourable (<6)   | Not reported/ not clear  | Singleton               | No description of allocation concealment or unclear description. High risk of bias. | Inpatient. | Not reported/ not clear.                                     |

|                 |                                                                                          |     |                         |                         |                         |                         |                          |                         |                                                                                                                                                |                              |                                                              |
|-----------------|------------------------------------------------------------------------------------------|-----|-------------------------|-------------------------|-------------------------|-------------------------|--------------------------|-------------------------|------------------------------------------------------------------------------------------------------------------------------------------------|------------------------------|--------------------------------------------------------------|
| Gherman 2001    | Vaginal PGE2 (gel) vs Oral misoprostol tablet (dose 50mcg or more)                       | 58  | None with previous CS   | Mixed parity            | All intact              | All unfavourable (<6)   | Mixed (includes preterm) | Singleton               | Report describes allocation concealment. Low risk of bias.                                                                                     | Inpatient.                   | No pharmaceutical industry funding/ no conflicts of interest |
| Gilson 1993     | Placebo vs Intracervical PGE2                                                            | 79  | Some with previous CS   | Mixed parity            | All intact              | All unfavourable (<6)   | Mixed (includes preterm) | Singleton               | Report describes allocation concealment. Low risk of bias.                                                                                     | One or both arms outpatient. | No pharmaceutical industry funding/ no conflicts of interest |
| Girija 2009     | Vaginal misoprostol (Dose less than 50 mcg) vs Vaginal misoprostol (Dose 50 mcg or more) | 100 | None with previous CS   | Mixed parity            | Mixed                   | All unfavourable (<6)   | All > 37 weeks           | Singleton               | Report describes allocation concealment. Low risk of bias.                                                                                     | Inpatient.                   | Not reported/ not clear.                                     |
| Girija 2011     | Intracervical PGE2 vs Vaginal misoprostol (Dose less than 50 mcg)                        | 320 | None with previous CS   | Mixed parity            | Mixed                   | All unfavourable (<6)   | All > 37 weeks           | Singleton               | Report describes allocation concealment. Low risk of bias.                                                                                     | Inpatient.                   | Not reported/ not clear.                                     |
| Gittens 1996    | No treatment vs Intracervical PGE2                                                       | 32  | All with previous CS    | Not reported/ not clear | All intact              | All unfavourable (<6)   | All > 37 weeks           | Not reported/ not clear | No description of allocation concealment or unclear description. High risk of bias.                                                            | One or both arms outpatient. | Not reported/ not clear.                                     |
| Gottschall 2007 | Vaginal PGE2 (gel) vs Vaginal misoprostol (Dose 50 mcg or more)                          | 75  | None with previous CS   | Mixed parity            | All intact              | Not reported/ not clear | Mixed (includes preterm) | Singleton               | Report describes allocation concealment. Low risk of bias.                                                                                     | Inpatient.                   | Not reported/ not clear.                                     |
| Graves 1985     | Placebo vs Vaginal PGE2 (gel)                                                            | 80  | None with previous CS   | Mixed parity            | All intact              | All unfavourable (<6)   | Not reported/ not clear  | Singleton               | Report describes allocation concealment. Low risk of bias. No description of allocation concealment or unclear description. High risk of bias. | Inpatient.                   | Some or all funding from pharmaceutical industry             |
| Green 1998      | Vaginal PGE2 (gel) vs Vaginal PGE2 (pessary - slow release)                              | 107 | Not reported/ not clear | Mixed parity            | Not reported/ not clear | All unfavourable (<6)   | All > 37 weeks           | Singleton               | No description of allocation concealment or unclear description. High risk of bias.                                                            | Inpatient.                   | Not reported/ not clear.                                     |
| Greer 1990      | Vaginal PGE2 (tablet) vs Vaginal PGE2 (gel)                                              | 24  | Not reported/ not clear | Multiparous only        | Not reported/ not clear | Mixed                   | All > 37 weeks           | Not reported/ not clear | No description of allocation concealment or unclear description. High risk of bias.                                                            | Inpatient.                   | Not reported/ not clear.                                     |
| Gregson 2005    | Vaginal PGE2 (gel) vs Vaginal misoprostol (Dose less than 50 mcg)                        | 268 | None with previous CS   | Mixed parity            | Mixed                   | Mixed                   | All > 37 weeks           | Singleton               | Report describes allocation concealment. Low risk of bias.                                                                                     | Inpatient.                   | Not reported/ not clear.                                     |



|                 |                                                                                             |      |                            |                            |                            |                            |                |                            |                                                                                     |                              |                                                              |
|-----------------|---------------------------------------------------------------------------------------------|------|----------------------------|----------------------------|----------------------------|----------------------------|----------------|----------------------------|-------------------------------------------------------------------------------------|------------------------------|--------------------------------------------------------------|
| Grunberger 1986 | Placebo vs Intracervical PGE2                                                               | 30   | None with previous CS      | Not reported/<br>not clear | Not reported/<br>not clear | All unfavourable (<6)      | All post-term  | Singleton                  | No description of allocation concealment or unclear description. High risk of bias. | Inpatient.                   | Not reported/<br>not clear.                                  |
| Gupta 2010      | Vaginal misoprostol (Dose less than 50 mcg) vs Vaginal misoprostol (Dose 50 mcg or more)    | 148  | None with previous CS      | Mixed parity               | All intact                 | All unfavourable (<6)      | All > 37 weeks | Mixed                      | No description of allocation concealment or unclear description. High risk of bias. | Inpatient.                   | Not reported/<br>not clear.                                  |
| Hales 1994      | Vaginal PGE2 (gel) vs Intracervical PGE2                                                    | 100  | Not reported/<br>not clear | Not reported/<br>not clear | All intact                 | All unfavourable (<6)      | All > 37 weeks | Not reported/<br>not clear | Report describes allocation concealment. Low risk of bias.                          | Inpatient.                   | No pharmaceutical industry funding/ no conflicts of interest |
| Hall 2002       | Vaginal misoprostol (Dose less than 50 mcg) vs Oral misoprostol tablet (dose 50mcg or more) | 107  | None with previous CS      | Mixed parity               | Mixed                      | Not reported/<br>not clear | All > 37 weeks | Singleton                  | Report describes allocation concealment. Low risk of bias.                          | Inpatient.                   | Not reported/<br>not clear.                                  |
| Hannah 1996     | No treatment vs Vaginal PGE2 (gel)                                                          | 2520 | Some with previous CS      | Mixed parity               | All ruptured               | Not reported/<br>not clear | All > 37 weeks | Singleton                  | Report describes allocation concealment. Low risk of bias.                          | One or both arms outpatient. | No pharmaceutical industry funding/ no conflicts of interest |
| Has 2002        | Vaginal misoprostol (Dose less than 50 mcg) vs Vaginal misoprostol (Dose 50 mcg or more)    | 114  | None with previous CS      | Mixed parity               | Mixed                      | All unfavourable (<6)      | All > 37 weeks | Singleton                  | Report describes allocation concealment. Low risk of bias.                          | Inpatient.                   | Not reported/<br>not clear.                                  |
| Hayashi 1983    | Placebo vs Vaginal PGE2 (gel)                                                               | 60   | Not reported/<br>not clear | Mixed parity               | Not reported/<br>not clear | All unfavourable (<6)      | All > 37 weeks | Not reported/<br>not clear | Report describes allocation concealment. Low risk of bias.                          | Inpatient.                   | Some or all funding from pharmaceutical industry             |
| Heinzl 1980     | Placebo vs Intracervical PGE2                                                               | 120  | None with previous CS      | Mixed parity               | Not reported/<br>not clear | All unfavourable (<6)      | All > 37 weeks | Singleton                  | Report describes allocation concealment. Low risk of bias.                          | Inpatient.                   | Not reported/<br>not clear.                                  |
| Henrich 2008    | Vaginal PGE2 (gel) vs Oral misoprostol tablet (dose 50mcg or more)                          | 224  | None with previous CS      | Mixed parity               | Mixed                      | All unfavourable (<6)      | All > 37 weeks | Singleton                  | Report describes allocation concealment. Low risk of bias.                          | Inpatient.                   | Not reported/<br>not clear.                                  |
| Herabutya 1992  | No treatment vs Intracervical PGE2                                                          | 108  | None with previous CS      | Mixed parity               | All intact                 | All unfavourable (<6)      | All post-term  | Singleton                  | No description of allocation concealment or unclear description. High risk of bias. | One or both arms outpatient. | Not reported/<br>not clear.                                  |

|                |                                                                                                                                                                    |     |                            |                     |                            |                                 |                             |                               |                                                                                              |                                    |                                                                             |
|----------------|--------------------------------------------------------------------------------------------------------------------------------------------------------------------|-----|----------------------------|---------------------|----------------------------|---------------------------------|-----------------------------|-------------------------------|----------------------------------------------------------------------------------------------|------------------------------------|-----------------------------------------------------------------------------|
| Herabutya 1993 | Vaginal PGE2 (tablet) vs Intracervical PGE2                                                                                                                        | 48  | Not reported/<br>not clear | Nulliparous<br>only | All intact                 | All<br>unfavourable<br>( $<6$ ) | Not reported/<br>not clear  | Not<br>reported/<br>not clear | No description of<br>allocation concealment or<br>unclear description. High<br>risk of bias. | One or<br>both arms<br>outpatient. | Not reported/<br>not clear.                                                 |
| Herabutya 1997 | Intracervical PGE2 vs Vaginal misoprostol (Dose 50 mcg or more)                                                                                                    | 110 | Not reported/<br>not clear | Mixed<br>parity     | All intact                 | All<br>unfavourable<br>( $<6$ ) | Mixed (includes<br>preterm) | Singleton                     | No description of<br>allocation concealment or<br>unclear description. High<br>risk of bias. | Inpatient.                         | Not reported/<br>not clear.                                                 |
| Hidar 2000     | No treatment vs Intracervical PGE2                                                                                                                                 | 88  | None with<br>previous CS   | Mixed<br>parity     | All ruptured               | All<br>unfavourable<br>( $<6$ ) | All $> 37$ weeks            | Singleton                     | No description of<br>allocation concealment or<br>unclear description. High<br>risk of bias. | Inpatient.                         | Not reported/<br>not clear.                                                 |
| Hoffman 2001   | Placebo vs Oral misoprostol tablet (dose 50mcg or more) Vaginal PGE2 (gel) vs Titrated (low dose) oral misoprostol solution vs Mechanical methods - foley catheter | 96  | None with<br>previous CS   | Mixed<br>parity     | All ruptured               | Not reported/<br>not clear      | All $> 37$ weeks            | Singleton                     | Report describes<br>allocation concealment.<br>Low risk of bias.                             | Inpatient.                         | Not reported/<br>not clear.                                                 |
| Hofmeyr 2001   |                                                                                                                                                                    | 866 | None with<br>previous CS   | Mixed<br>parity     | Mixed                      | Mixed                           | Mixed (includes<br>preterm) | Singleton                     | Report describes<br>allocation concealment.<br>Low risk of bias.                             | Inpatient.                         | Not reported/<br>not clear.                                                 |
| Hosli 2008     | Vaginal PGE2 (gel) vs Vaginal misoprostol (Dose 50 mcg or more)                                                                                                    | 107 | None with<br>previous CS   | Mixed<br>parity     | Mixed                      | All<br>unfavourable<br>( $<6$ ) | All $> 37$ weeks            | Singleton                     | Report describes<br>allocation concealment.<br>Low risk of bias.                             | Inpatient.                         | No<br>pharmaceutical<br>industry<br>funding/ no<br>conflicts of<br>interest |
| How 2001       | Vaginal misoprostol (Dose less than 50 mcg) vs Oral misoprostol tablet (Dose less than 50 mcg)                                                                     | 219 | Some with<br>previous CS   | Mixed<br>parity     | All ruptured               | All<br>unfavourable<br>( $<6$ ) | All $> 37$ weeks            | Singleton                     | Report describes<br>allocation concealment.<br>Low risk of bias.                             | Inpatient.                         | Not reported/<br>not clear.                                                 |
| Howarth 1996   | Vaginal PGE2 (gel) vs Vaginal misoprostol (Dose 50 mcg or more)                                                                                                    | 72  | None with<br>previous CS   | Mixed<br>parity     | All intact                 | Mixed                           | Mixed (includes<br>preterm) | Singleton                     | Report describes<br>allocation concealment.<br>Low risk of bias.                             | Inpatient.                         | Not reported/<br>not clear.                                                 |
| Husslein 1986  | No treatment vs Vaginal PGE2 (tablet)                                                                                                                              | 345 | None with<br>previous CS   | Mixed<br>parity     | All intact                 | All favourable<br>( $>6$ )      | All $> 37$ weeks            | Singleton                     | No description of<br>allocation concealment or<br>unclear description. High<br>risk of bias. | Inpatient.                         | Not reported/<br>not clear.                                                 |
| Hutcheon 1980  | Placebo vs Intracervical PGE2                                                                                                                                      | 67  | None with<br>previous CS   | Mixed<br>parity     | Not reported/<br>not clear | All<br>unfavourable<br>( $<6$ ) | Not reported/<br>not clear  | Singleton                     | Report describes<br>allocation concealment.<br>Low risk of bias.                             | One or<br>both arms<br>outpatient. | No<br>pharmaceutical<br>industry<br>funding/ no<br>conflicts of<br>interest |

|                  |                                                                                                                                   |     |                       |                  |                         |                       |                          |           |                                                                                                                                                |                              |                                                              |
|------------------|-----------------------------------------------------------------------------------------------------------------------------------|-----|-----------------------|------------------|-------------------------|-----------------------|--------------------------|-----------|------------------------------------------------------------------------------------------------------------------------------------------------|------------------------------|--------------------------------------------------------------|
| Incerpi 2001     | Placebo vs Vaginal misoprostol (Dose less than 50 mcg)                                                                            | 120 | None with previous CS | Mixed parity     | All intact              | All unfavourable (<6) | All > 37 weeks           | Singleton | Report describes allocation concealment. Low risk of bias. No description of allocation concealment or unclear description. High risk of bias. | One or both arms outpatient. | Not reported/ not clear.                                     |
| Irion 1998       | Vaginal PGE2 (gel) vs Intracervical PGE2                                                                                          | 247 | Some with previous CS | Mixed parity     | All intact              | All unfavourable (<6) | Mixed (includes preterm) | Singleton | Report describes allocation concealment. Low risk of bias. No description of allocation concealment or unclear description. High risk of bias. | Inpatient.                   | Not reported/ not clear.                                     |
| Jindal 2011      | Vaginal misoprostol (Dose 50 mcg or more) vs Oral misoprostol tablet (dose 50mcg or more)                                         | 103 | None with previous CS | Mixed parity     | All ruptured            | All unfavourable (<6) | All > 37 weeks           | Singleton | Report describes allocation concealment. Low risk of bias.                                                                                     | Inpatient.                   | Some or all funding from pharmaceutical industry             |
| Kadanali 1996    | Intracervical PGE2 vs Vaginal misoprostol (Dose 50 mcg or more)                                                                   | 224 | None with previous CS | Mixed parity     | Mixed                   | All unfavourable (<6) | All > 37 weeks           | Singleton | Report describes allocation concealment. Low risk of bias.                                                                                     | Inpatient.                   | Not reported/ not clear.                                     |
| Kalkat 2008      | Vaginal PGE2 (gel) vs Vaginal PGE2 (pessary - slow release)                                                                       | 120 | None with previous CS | Mixed parity     | Not reported/ not clear | Mixed                 | Mixed (includes preterm) | Mixed     | Report describes allocation concealment. Low risk of bias.                                                                                     | Inpatient.                   | Not reported/ not clear.                                     |
| Keirse 1995      | Vaginal PGE2 (gel) vs Intracervical PGE2                                                                                          | 282 | None with previous CS | Mixed parity     | All intact              | Mixed                 | All > 37 weeks           | Singleton | Report describes allocation concealment. Low risk of bias. No description of allocation concealment or unclear description. High risk of bias. | Inpatient.                   | No pharmaceutical industry funding/ no conflicts of interest |
| Kemp 2000        | Vaginal PGE2 (gel) vs Intracervical PGE2                                                                                          | 470 | None with previous CS | Mixed parity     | Mixed                   | All unfavourable (<6) | Mixed (includes preterm) | Singleton | No description of allocation concealment or unclear description. High risk of bias.                                                            | Inpatient.                   | Not reported/ not clear.                                     |
| Khazardoost 2011 | Vaginal misoprostol (Dose less than 50 mcg) vs Oral misoprostol tablet (dose 50mcg or more)                                       | 60  | None with previous CS | Mixed parity     | All intact              | All unfavourable (<6) | All post-term            | Singleton | No description of allocation concealment or unclear description. High risk of bias.                                                            | Inpatient.                   | Not reported/ not clear.                                     |
| Khoury 2001      | Vaginal PGE2 (pessary - slow release) vs Vaginal misoprostol (Dose less than 50 mcg) vs Vaginal misoprostol (Dose 50 mcg or more) | 118 | None with previous CS | Mixed parity     | All intact              | All unfavourable (<6) | All > 37 weeks           | Singleton | Report describes allocation concealment. Low risk of bias. No description of allocation concealment or unclear description. High risk of bias. | Inpatient.                   | Some or all funding from pharmaceutical industry             |
| Kim 2000         | Vaginal PGE2 (tablet) vs Vaginal misoprostol (Dose 50 mcg or more)                                                                | 113 | None with previous CS | Nulliparous only | All intact              | All unfavourable (<6) | All > 37 weeks           | Singleton | Report describes allocation concealment. Low risk of bias. No description of allocation concealment or unclear description. High risk of bias. | Inpatient.                   | Not reported/ not clear.                                     |

|                   |                                                                                                 |     |                         |              |                         |                       |                          |                         |                                                                                     |                              |                                                              |
|-------------------|-------------------------------------------------------------------------------------------------|-----|-------------------------|--------------|-------------------------|-----------------------|--------------------------|-------------------------|-------------------------------------------------------------------------------------|------------------------------|--------------------------------------------------------------|
| Kipikasaa 2005    | Oral misoprostol tablet (Dose less than 50 mcg) vs Oral misoprostol tablet (dose 50mcg or more) | 52  | None with previous CS   | Mixed parity | All intact              | All unfavourable (<6) | All post-term            | Singleton               | Report describes allocation concealment. Low risk of bias.                          | One or both arms outpatient. | No pharmaceutical industry funding/ no conflicts of interest |
| Kolderup 1999     | Intracervical PGE2 vs Vaginal misoprostol (Dose 50 mcg or more)                                 | 159 | None with previous CS   | Mixed parity | All intact              | All unfavourable (<6) | Mixed (includes preterm) | Singleton               | Report describes allocation concealment. Low risk of bias.                          | Inpatient.                   | Not reported/ not clear.                                     |
| Komala 2013       | Vaginal misoprostol (Dose less than 50 mcg) vs Oral misoprostol tablet (dose 50mcg or more)     | 200 | None with previous CS   | Mixed parity | Mixed                   | All unfavourable (<6) | Not reported/ not clear  | Singleton               | No description of allocation concealment or unclear description. High risk of bias. | Inpatient.                   | No pharmaceutical industry funding/ no conflicts of interest |
| Kovavisarach 1997 | Vaginal PGE2 (tablet) vs Vaginal misoprostol (Dose 50 mcg or more)                              | 60  | Not reported/ not clear | Mixed parity | Not reported/ not clear | All unfavourable (<6) | All > 37 weeks           | Not reported/ not clear | No description of allocation concealment or unclear description. High risk of bias. | Inpatient.                   | Not reported/ not clear.                                     |
| Kovavisarach 1998 | Vaginal PGE2 (tablet) vs Vaginal misoprostol (Dose 50 mcg or more)                              | 80  | Not reported/ not clear | Mixed parity | Not reported/ not clear | All unfavourable (<6) | All > 37 weeks           | Not reported/ not clear | No description of allocation concealment or unclear description. High risk of bias. | Inpatient.                   | Not reported/ not clear.                                     |
| Krithika 2008     | Intracervical PGE2 vs Vaginal misoprostol (Dose less than 50 mcg)                               | 100 | None with previous CS   | Mixed parity | Not reported/ not clear | All unfavourable (<6) | Mixed (includes preterm) | Singleton               | No description of allocation concealment or unclear description. High risk of bias. | Inpatient.                   | No pharmaceutical industry funding/ no conflicts of interest |
| Kulshreshtha 2007 | Intracervical PGE2 vs Vaginal misoprostol (Dose 50 mcg or more)                                 | 40  | None with previous CS   | Mixed parity | Mixed                   | Mixed                 | All > 37 weeks           | Singleton               | No description of allocation concealment or unclear description. High risk of bias. | Inpatient.                   | Not reported/ not clear.                                     |
| Kumar 2001        | Intracervical PGE2 vs Vaginal misoprostol (Dose less than 50 mcg)                               | 200 | None with previous CS   | Mixed parity | Not reported/ not clear | Mixed                 | Mixed (includes preterm) | Singleton               | No description of allocation concealment or unclear description. High risk of bias. | Inpatient.                   | Not reported/ not clear.                                     |
| Kwon 2001         | Vaginal misoprostol (Dose 50 mcg or more) vs Oral misoprostol tablet (dose 50mcg or more)       | 160 | None with previous CS   | Mixed parity | All intact              | All unfavourable (<6) | All > 37 weeks           | Singleton               | Report describes allocation concealment. Low risk of bias.                          | Inpatient.                   | Not reported/ not clear.                                     |
| Langenegger 2005  | Intracervical PGE2 vs Oral misoprostol tablet (dose 50mcg or more)                              | 191 | None with previous CS   | Mixed parity | All intact              | All unfavourable (<6) | Mixed (includes preterm) | Singleton               | Report describes allocation concealment. Low risk of bias.                          | Inpatient.                   | Not reported/ not clear.                                     |

|                  |                                                                                                                 |     |                            |                  |                            |                            |                            |                            |                                                                                     |                              |                                                  |
|------------------|-----------------------------------------------------------------------------------------------------------------|-----|----------------------------|------------------|----------------------------|----------------------------|----------------------------|----------------------------|-------------------------------------------------------------------------------------|------------------------------|--------------------------------------------------|
| Larmon 2002      | Placebo vs Intracervical PGE2 vs Oestrogens                                                                     | 128 | Not reported/<br>not clear | Mixed parity     | All intact                 | All unfavourable (<6)      | All > 37 weeks             | Not reported/<br>not clear | Report describes allocation concealment. Low risk of bias.                          | One or both arms outpatient. | Not reported/<br>not clear.                      |
| Laube 1986       | Placebo vs Intracervical PGE2                                                                                   | 45  | None with previous CS      | Mixed parity     | All intact                 | All unfavourable (<6)      | Not reported/<br>not clear | Singleton                  | Report describes allocation concealment. Low risk of bias.                          | Inpatient.                   | Some or all funding from pharmaceutical industry |
| Le Roux 2002     | Vaginal PGE2 (gel) vs Vaginal misoprostol (Dose 50 mcg or more) vs Oral misoprostol tablet (dose 50mcg or more) | 480 | None with previous CS      | Mixed parity     | All intact                 | All unfavourable (<6)      | Mixed (includes preterm)   | Singleton                  | Report describes allocation concealment. Low risk of bias.                          | Inpatient.                   | Not reported/<br>not clear.                      |
| Lee 1997         | Vaginal PGE2 (tablet) vs Vaginal misoprostol (Dose 50 mcg or more)                                              | 50  | None with previous CS      | Mixed parity     | Not reported/<br>not clear | All unfavourable (<6)      | All post-term              | Singleton                  | Report describes allocation concealment. Low risk of bias.                          | Inpatient.                   | Not reported/<br>not clear.                      |
| Legarth 1988     | Intracervical PGE2 vs Vaginal PGE2 pessary (normal release)                                                     | 113 | Not reported/<br>not clear | Mixed parity     | Not reported/<br>not clear | All unfavourable (<6)      | Not reported/<br>not clear | Singleton                  | No description of allocation concealment or unclear description. High risk of bias. | Inpatient.                   | Not reported/<br>not clear.                      |
| Lemancewicz 1999 | Intracervical PGE2 vs Vaginal misoprostol (Dose 50 mcg or more) vs IV oxytocin                                  | 131 | None with previous CS      | Mixed parity     | Not reported/<br>not clear | All unfavourable (<6)      | All post-term              | Singleton                  | Report describes allocation concealment. Low risk of bias.                          | Inpatient.                   | Not reported/<br>not clear.                      |
| Levy 2005        | Placebo vs Oral misoprostol tablet (dose 50mcg or more)                                                         | 130 | None with previous CS      | Mixed parity     | All ruptured               | All unfavourable (<6)      | All > 37 weeks             | Singleton                  | Report describes allocation concealment. Low risk of bias.                          | Inpatient.                   | Not reported/<br>not clear.                      |
| Lien 1998        | Placebo vs Intracervical PGE2                                                                                   | 93  | None with previous CS      | Mixed parity     | Mixed                      | All unfavourable (<6)      | All post-term              | Singleton                  | Report describes allocation concealment. Low risk of bias.                          | Inpatient.                   | Some or all funding from pharmaceutical industry |
| Liggins 1979     | Placebo vs Vaginal PGE2 pessary (normal release)                                                                | 84  | Not reported/<br>not clear | Mixed parity     | Not reported/<br>not clear | Mixed                      | All > 37 weeks             | Not reported/<br>not clear | Report describes allocation concealment. Low risk of bias.                          | Inpatient.                   | Some or all funding from pharmaceutical industry |
| Lo 2003          | Placebo vs Oral misoprostol tablet (dose 50mcg or more)                                                         | 102 | None with previous CS      | Nulliparous only | All ruptured               | Not reported/<br>not clear | Mixed (includes preterm)   | Singleton                  | Report describes allocation concealment. Low risk of bias.                          | Inpatient.                   | Not reported/<br>not clear.                      |
| Lokugamage 2003  | Vaginal PGE2 (gel) vs Vaginal misoprostol (Dose 50 mcg or more)                                                 | 191 | None with previous CS      | Nulliparous only | Mixed                      | All unfavourable (<6)      | All > 37 weeks             | Mixed                      | Report describes allocation concealment. Low risk of bias.                          | Inpatient.                   | Not reported/<br>not clear.                      |
| Lopes 1991       | Vaginal PGE2 (gel) vs Intracervical PGE2                                                                        | 50  | Not reported/<br>not clear | Mixed parity     | Mixed                      | All unfavourable (<6)      | Not reported/<br>not clear | Not reported/<br>not clear | No description of allocation concealment or unclear description. High risk of bias. | Inpatient.                   | Not reported/<br>not clear.                      |

|                   |                                                                                                                                                                                                  |     |                            |                            |                            |                            |                            |           |                                                                                     |                              |                             |
|-------------------|--------------------------------------------------------------------------------------------------------------------------------------------------------------------------------------------------|-----|----------------------------|----------------------------|----------------------------|----------------------------|----------------------------|-----------|-------------------------------------------------------------------------------------|------------------------------|-----------------------------|
| Lopez-Farfan 2010 | Vaginal PGE2 (pessary - slow release) vs Intracervical PGE2                                                                                                                                      | 50  | Not reported/<br>not clear | Not reported/<br>not clear | All ruptured               | All unfavourable (<6)      | All > 37 weeks             | Singleton | No description of allocation concealment or unclear description. High risk of bias. | Inpatient.                   | Not reported/<br>not clear. |
| Lyndrup 1991      | Intracervical PGE2 vs Vaginal PGE2 pessary (normal release)                                                                                                                                      | 125 | None with previous CS      | Mixed parity               | Not reported/<br>not clear | All unfavourable (<6)      | Mixed (includes preterm)   | Singleton | No description of allocation concealment or unclear description. High risk of bias. | Inpatient.                   | Not reported/<br>not clear. |
| MacKenzie 1979    | Placebo vs Vaginal PGE2 (gel) vs PGF2 gel                                                                                                                                                        | 48  | None with previous CS      | Nulliparous only           | Not reported/<br>not clear | All unfavourable (<6)      | All > 37 weeks             | Singleton | No description of allocation concealment or unclear description. High risk of bias. | Inpatient.                   | Not reported/<br>not clear. |
| MacLennan 1979    | Placebo vs PGF2 gel                                                                                                                                                                              | 80  | None with previous CS      | Mixed parity               | Not reported/<br>not clear | Mixed                      | Mixed (includes preterm)   | Singleton | Report describes allocation concealment. Low risk of bias.                          | Inpatient.                   | Not reported/<br>not clear. |
| Magtibay 1998     | Intracervical PGE2 vs Vaginal misoprostol (Dose 50 mcg or more)                                                                                                                                  | 36  | None with previous CS      | Mixed parity               | Not reported/<br>not clear | All unfavourable (<6)      | All > 37 weeks             | Singleton | No description of allocation concealment or unclear description. High risk of bias. | Inpatient.                   | Not reported/<br>not clear. |
| Mahmood 1989      | Vaginal PGE2 (tablet) vs Vaginal PGE2 (gel)                                                                                                                                                      | 80  | None with previous CS      | Nulliparous only           | Not reported/<br>not clear | All unfavourable (<6)      | All > 37 weeks             | Singleton | Report describes allocation concealment. Low risk of bias.                          | Inpatient.                   | Not reported/<br>not clear. |
| Mahmood 1992      | No treatment vs Vaginal PGE2 (gel)                                                                                                                                                               | 220 | None with previous CS      | Nulliparous only           | All ruptured               | All unfavourable (<6)      | All > 37 weeks             | Singleton | Report describes allocation concealment. Low risk of bias.                          | Inpatient.                   | Not reported/<br>not clear. |
| Mahmood 1995      | No treatment vs Vaginal PGE2 (gel)<br>Vaginal PGE2 pessary (normal release) vs Vaginal misoprostol (Dose 50 mcg or more) vs Titrated (low dose) oral misoprostol solution vs Extra-amniotic PGE2 | 100 | None with previous CS      | Multiparous only           | All ruptured               | All unfavourable (<6)      | Not reported/<br>not clear | Singleton | Report describes allocation concealment. Low risk of bias.                          | Inpatient.                   | Not reported/<br>not clear. |
| Majoko 2002       |                                                                                                                                                                                                  | 406 | None with previous CS      | Mixed parity               | Not reported/<br>not clear | Not reported/<br>not clear | All > 37 weeks             | Singleton | Report describes allocation concealment. Low risk of bias.                          | Inpatient.                   | Not reported/<br>not clear. |
| McCaul 1997       | No treatment vs Vaginal PGE2 (gel) vs IV oxytocin                                                                                                                                                | 91  | None with previous CS      | Mixed parity               | All ruptured               | All unfavourable (<6)      | Mixed (includes preterm)   | Mixed     | Report describes allocation concealment. Low risk of bias.                          | Inpatient.                   | Not reported/<br>not clear. |
| McKenna 1999      | Placebo vs Intracervical PGE2                                                                                                                                                                    | 61  | Some with previous CS      | Mixed parity               | All intact                 | Mixed                      | All > 37 weeks             | Singleton | Report describes allocation concealment. Low risk of bias.                          | One or both arms outpatient. | Not reported/<br>not clear. |

|               |                                                                                                                    |     |                         |                  |                         |                       |                          |                         |                                                                                                                                                |                              |                                                              |
|---------------|--------------------------------------------------------------------------------------------------------------------|-----|-------------------------|------------------|-------------------------|-----------------------|--------------------------|-------------------------|------------------------------------------------------------------------------------------------------------------------------------------------|------------------------------|--------------------------------------------------------------|
| McKenna 2004  | Placebo vs Vaginal misoprostol (Dose less than 50 mcg)                                                             | 68  | None with previous CS   | Mixed parity     | All intact              | Mixed                 | All post-term            | Singleton               | Report describes allocation concealment. Low risk of bias. No description of allocation concealment or unclear description. High risk of bias. | One or both arms outpatient. | Not reported/ not clear.                                     |
| McLauren 1987 | Vaginal PGE2 (tablet) vs Vaginal PGE2 (pessary - slow release)                                                     | 24  | Not reported/ not clear | Multiparous only | Not reported/ not clear | Mixed                 | All > 37 weeks           | Not reported/ not clear | Report describes allocation concealment. Low risk of bias.                                                                                     | Inpatient.                   | Not reported/ not clear.                                     |
| Megalo 2004   | Intracervical PGE2 vs Vaginal misoprostol (Dose 50 mcg or more)                                                    | 200 | None with previous CS   | Mixed parity     | Mixed                   | Mixed                 | Mixed (includes preterm) | Singleton               | Report describes allocation concealment. Low risk of bias.                                                                                     | Inpatient.                   | Not reported/ not clear.                                     |
| Mehrotra 2010 | Vaginal misoprostol (Dose 50 mcg or more) vs Oral misoprostol tablet (dose 50mcg or more)                          | 128 | None with previous CS   | Mixed parity     | All intact              | All unfavourable (<6) | All > 37 weeks           | Singleton               | No description of allocation concealment or unclear description. High risk of bias.                                                            | Inpatient.                   | No pharmaceutical industry funding/ no conflicts of interest |
| Meydanli 2003 | Vaginal misoprostol (Dose less than 50 mcg) vs Vaginal misoprostol (Dose 50 mcg or more)                           | 120 | None with previous CS   | Mixed parity     | All intact              | All unfavourable (<6) | All post-term            | Singleton               | Report describes allocation concealment. Low risk of bias.                                                                                     | Inpatient.                   | Not reported/ not clear.                                     |
| Meyer 2002    | Intracervical PGE2 vs Vaginal misoprostol (Dose less than 50 mcg)                                                  | 84  | None with previous CS   | Mixed parity     | All intact              | All unfavourable (<6) | All > 37 weeks           | Singleton               | Report describes allocation concealment. Low risk of bias.                                                                                     | One or both arms outpatient. | Not reported/ not clear.                                     |
| Miller 1991   | Vaginal PGE2 (gel) vs Vaginal PGE2 (pessary - slow release)                                                        | 40  | Not reported/ not clear | Mixed parity     | Not reported/ not clear | All unfavourable (<6) | All > 37 weeks           | Singleton               | No description of allocation concealment or unclear description. High risk of bias.                                                            | Inpatient.                   | Some or all funding from pharmaceutical industry             |
| Moodley 2003  | Vaginal PGE2 (gel) vs Vaginal misoprostol (Dose less than 50 mcg) vs Titrated (low dose) oral misoprostol solution | 396 | None with previous CS   | Mixed parity     | Mixed                   | All unfavourable (<6) | Mixed (includes preterm) | Singleton               | Report describes allocation concealment. Low risk of bias.                                                                                     | Inpatient.                   | Not reported/ not clear.                                     |
| Murphy 1980   | Placebo vs PGF2 gel                                                                                                | 265 | Not reported/ not clear | Mixed parity     | Not reported/ not clear | Mixed                 | All > 37 weeks           | Not reported/ not clear | Report describes allocation concealment. Low risk of bias.                                                                                     | Inpatient.                   | Some or all funding from pharmaceutical industry             |
| Murray 1995   | Vaginal PGE2 (tablet) vs Vaginal PGE2 (gel)                                                                        | 200 | None with previous CS   | Nulliparous only | All intact              | All unfavourable (<6) | All > 37 weeks           | Singleton               | Report describes allocation concealment. Low risk of bias.                                                                                     | Inpatient.                   | Not reported/ not clear.                                     |

|              |                                                                                          |     |                         |                         |                         |                         |                          |                         |                                                                                                                                                |                              |                                                              |
|--------------|------------------------------------------------------------------------------------------|-----|-------------------------|-------------------------|-------------------------|-------------------------|--------------------------|-------------------------|------------------------------------------------------------------------------------------------------------------------------------------------|------------------------------|--------------------------------------------------------------|
| Murthy 2006  | Intracervical PGE2 vs Vaginal misoprostol (Dose less than 50 mcg)                        | 72  | None with previous CS   | Mixed parity            | All intact              | All unfavourable (<6)   | All > 37 weeks           | Singleton               | Report describes allocation concealment. Low risk of bias. No description of allocation concealment or unclear description. High risk of bias. | Inpatient.                   | Not reported/ not clear.                                     |
| Nager 1987   | No treatment vs Intracervical PGE2                                                       | 34  | None with previous CS   | Mixed parity            | All intact              | All unfavourable (<6)   | All > 37 weeks           | Not reported/ not clear | Report describes allocation concealment. Low risk of bias.                                                                                     | Inpatient.                   | Not reported/ not clear.                                     |
| Nagpal 2009  | Intracervical PGE2 vs Oral misoprostol tablet (dose 50mcg or more)                       | 61  | None with previous CS   | Mixed parity            | All ruptured            | All unfavourable (<6)   | All > 37 weeks           | Singleton               | Report describes allocation concealment. Low risk of bias.                                                                                     | Inpatient.                   | Not reported/ not clear.                                     |
| Nanda 2007   | Intracervical PGE2 vs Vaginal misoprostol (Dose less than 50 mcg)                        | 100 | None with previous CS   | Mixed parity            | All intact              | All unfavourable (<6)   | All > 37 weeks           | Singleton               | No description of allocation concealment or unclear description. High risk of bias.                                                            | Inpatient.                   | No pharmaceutical industry funding/ no conflicts of interest |
| Neiger 2001  | Intracervical PGE2 vs Vaginal misoprostol (Dose 50 mcg or more)                          | 61  | None with previous CS   | Mixed parity            | All intact              | All unfavourable (<6)   | All > 37 weeks           | Singleton               | No description of allocation concealment or unclear description. High risk of bias.                                                            | Inpatient.                   | Not reported/ not clear.                                     |
| Neilson 1983 | Vaginal PGE2 (gel) vs PGF2 gel                                                           | 76  | Not reported/ not clear | Mixed parity            | All intact              | All unfavourable (<6)   | Mixed (includes preterm) | Not reported/ not clear | Report describes allocation concealment. Low risk of bias.                                                                                     | Inpatient.                   | Not reported/ not clear.                                     |
| Newman 1997  | No treatment vs Vaginal PGE2 (gel)                                                       | 58  | Not reported/ not clear | Mixed parity            | Not reported/ not clear | All unfavourable (<6)   | All > 37 weeks           | Not reported/ not clear | No description of allocation concealment or unclear description. High risk of bias.                                                            | One or both arms outpatient. | Not reported/ not clear.                                     |
| Ngai 1996    | Placebo vs Oral misoprostol tablet (dose 50mcg or more)                                  | 80  | None with previous CS   | Mixed parity            | All ruptured            | Not reported/ not clear | All > 37 weeks           | Singleton               | Report describes allocation concealment. Low risk of bias.                                                                                     | Inpatient.                   | Not reported/ not clear.                                     |
| NICHHD 1994  | No treatment vs Placebo vs Intracervical PGE2                                            | 440 | None with previous CS   | Mixed parity            | All intact              | All unfavourable (<6)   | All post-term            | Not reported/ not clear | No description of allocation concealment or unclear description. High risk of bias.                                                            | Inpatient.                   | No pharmaceutical industry funding/ no conflicts of interest |
| Nigam 2010   | Vaginal misoprostol (Dose less than 50 mcg) vs Vaginal misoprostol (Dose 50 mcg or more) | 120 | None with previous CS   | Mixed parity            | Not reported/ not clear | All unfavourable (<6)   | All > 37 weeks           | Singleton               | No description of allocation concealment or unclear description. High risk of bias.                                                            | Inpatient.                   | Not reported/ not clear.                                     |
| Nimrod 1984  | Placebo vs Intracervical PGE2                                                            | 45  | Not reported/ not clear | Not reported/ not clear | All intact              | All unfavourable (<6)   | Not reported/ not clear  | Not reported/ not clear | Report describes allocation concealment. Low risk of bias.                                                                                     | Inpatient.                   | Not reported/ not clear.                                     |



|                       |                                                                                             |     |                         |              |                         |                       |                          |                         |                                                                                                     |                              |                                                              |
|-----------------------|---------------------------------------------------------------------------------------------|-----|-------------------------|--------------|-------------------------|-----------------------|--------------------------|-------------------------|-----------------------------------------------------------------------------------------------------|------------------------------|--------------------------------------------------------------|
| Noah 1987             | No treatment vs Intracervical PGE2                                                          | 816 | None with previous CS   | Mixed parity | All intact              | All unfavourable (<6) | Mixed (includes preterm) | Not reported/ not clear | No description of allocation concealment or unclear description. High risk of bias.                 | Inpatient.                   | Some or all funding from pharmaceutical industry             |
| Nopdonrattakoon 2003  | Vaginal misoprostol (Dose 50 mcg or more) vs Oral misoprostol tablet (dose 50mcg or more)   | 106 | None with previous CS   | Mixed parity | All intact              | All unfavourable (<6) | All > 37 weeks           | Singleton               | Report describes allocation concealment. Low risk of bias.                                          | Inpatient.                   | Not reported/ not clear.                                     |
| Nunes 1999            | Vaginal PGE2 (gel) vs Vaginal misoprostol (Dose 50 mcg or more)                             | 189 | None with previous CS   | Mixed parity | Mixed                   | All unfavourable (<6) | All > 37 weeks           | Singleton               | Report describes allocation concealment. Low risk of bias. Report describes allocation concealment. | Inpatient.                   | Not reported/ not clear.                                     |
| Nuutila 1995          | Placebo vs Intracervical PGE2                                                               | 45  | Not reported/ not clear | Mixed parity | Not reported/ not clear | All unfavourable (<6) | All > 37 weeks           | Singleton               | Report describes allocation concealment. Low risk of bias.                                          | Inpatient.                   | Not reported/ not clear.                                     |
| Nuutila 1996          | Vaginal PGE2 (gel) vs Intracervical PGE2                                                    | 110 | Not reported/ not clear | Mixed parity | All intact              | All unfavourable (<6) | All > 37 weeks           | Singleton               | Report describes allocation concealment. Low risk of bias.                                          | Inpatient.                   | Not reported/ not clear.                                     |
| Oboro 2005            | No treatment vs Vaginal misoprostol (Dose less than 50 mcg)                                 | 77  | None with previous CS   | Mixed parity | All intact              | Mixed                 | All post-term            | Singleton               | Report describes allocation concealment. Low risk of bias.                                          | One or both arms outpatient. | Not reported/ not clear.                                     |
| O'Brien 1995          | Placebo vs Vaginal PGE2 (gel)                                                               | 100 | Some with previous CS   | Mixed parity | All intact              | All unfavourable (<6) | All > 37 weeks           | Singleton               | Report describes allocation concealment. Low risk of bias.                                          | One or both arms outpatient. | No pharmaceutical industry funding/ no conflicts of interest |
| Ottinger 1998         | Vaginal PGE2 (pessary - slow release) vs Intracervical PGE2                                 | 90  | Some with previous CS   | Mixed parity | All intact              | Mixed                 | Mixed (includes preterm) | Singleton               | Report describes allocation concealment. Low risk of bias.                                          | Inpatient.                   | Not reported/ not clear.                                     |
| Owen 1991             | Placebo vs Intracervical PGE2                                                               | 100 | Not reported/ not clear | Mixed parity | All intact              | All unfavourable (<6) | Not reported/ not clear  | Not reported/ not clear | Report describes allocation concealment. Low risk of bias.                                          | Inpatient.                   | Not reported/ not clear.                                     |
| Ozkan 2009            | Vaginal PGE2 (pessary - slow release) vs Vaginal misoprostol (Dose 50 mcg or more)          | 112 | None with previous CS   | Mixed parity | All intact              | All unfavourable (<6) | All > 37 weeks           | Singleton               | Report describes allocation concealment. Low risk of bias.                                          | Inpatient.                   | No pharmaceutical industry funding/ no conflicts of interest |
| Paisarntantiwong 2005 | Vaginal misoprostol (Dose less than 50 mcg) vs Oral misoprostol tablet (dose 50mcg or more) | 146 | None with previous CS   | Mixed parity | All intact              | All unfavourable (<6) | All > 37 weeks           | Singleton               | Report describes allocation concealment. Low risk of bias.                                          | Inpatient.                   | Not reported/ not clear.                                     |

|                    |                                                                                           |     |                         |                         |                         |                       |                          |                         |                                                                                                                                                |            |                                                              |
|--------------------|-------------------------------------------------------------------------------------------|-----|-------------------------|-------------------------|-------------------------|-----------------------|--------------------------|-------------------------|------------------------------------------------------------------------------------------------------------------------------------------------|------------|--------------------------------------------------------------|
| Pandis 2001        | Vaginal PGE2 (gel) vs Vaginal misoprostol (Dose 50 mcg or more)                           | 435 | None with previous CS   | Mixed parity            | All intact              | All unfavourable (<6) | All > 37 weeks           | Singleton               | Report describes allocation concealment. Low risk of bias. No description of allocation concealment or unclear description. High risk of bias. | Inpatient. | No pharmaceutical industry funding/ no conflicts of interest |
| Papanikolaou 2004  | Vaginal PGE2 (tablet) vs Vaginal misoprostol (Dose 50 mcg or more)                        | 163 | None with previous CS   | Nulliparous only        | All intact              | All unfavourable (<6) | All post-term            | Singleton               | No description of allocation concealment or unclear description. High risk of bias.                                                            | Inpatient. | Not reported/ not clear.                                     |
| Patil 2005         | Intracervical PGE2 vs Oral misoprostol tablet (dose 50mcg or more)                        | 190 | Some with previous CS   | Mixed parity            | All intact              | All unfavourable (<6) | All > 37 weeks           | Singleton               | Report describes allocation concealment. Low risk of bias.                                                                                     | Inpatient. | Not reported/ not clear.                                     |
| Paungmora 2004     | Vaginal misoprostol (Dose 50 mcg or more) vs Oral misoprostol tablet (dose 50mcg or more) | 151 | None with previous CS   | Mixed parity            | All intact              | All unfavourable (<6) |                          | Singleton               | No description of allocation concealment or unclear description. High risk of bias.                                                            | Inpatient. | Not reported/ not clear.                                     |
| Peccerillo 1995    | Vaginal PGE2 (gel) vs Intracervical PGE2                                                  | 67  | Not reported/ not clear | Not reported/ not clear | Not reported/ not clear | All unfavourable (<6) | All > 37 weeks           | Not reported/ not clear | No description of allocation concealment or unclear description. High risk of bias.                                                            | Inpatient. | Not reported/ not clear.                                     |
| Pedrazzoli 1997    | Vaginal PGE2 (gel) vs Intracervical PGE2                                                  | 247 | Not reported/ not clear | Not reported/ not clear | Not reported/ not clear | All unfavourable (<6) | Not reported/ not clear  | Not reported/ not clear | Report describes allocation concealment. Low risk of bias.                                                                                     | Inpatient. | Not reported/ not clear.                                     |
| Perez Picanol 1990 | No treatment vs Intracervical PGE2                                                        | 71  | Not reported/ not clear | Not reported/ not clear | All ruptured            | All unfavourable (<6) | All > 37 weeks           | Not reported/ not clear | No description of allocation concealment or unclear description. High risk of bias.                                                            | Inpatient. | Not reported/ not clear.                                     |
| Perry 2004         | Vaginal PGE2 (pessary - slow release) vs Intracervical PGE2                               | 63  | None with previous CS   | Mixed parity            | All intact              | All unfavourable (<6) | Mixed (includes preterm) | Singleton               | Report describes allocation concealment. Low risk of bias.                                                                                     | Inpatient. | Not reported/ not clear.                                     |
| Perryman 1992      | Vaginal PGE2 (gel) vs Vaginal PGE2 pessary (normal release)                               | 90  | Not reported/ not clear | Mixed parity            | All intact              | All unfavourable (<6) | Mixed (includes preterm) | Not reported/ not clear | Report describes allocation concealment. Low risk of bias.                                                                                     | Inpatient. | Not reported/ not clear.                                     |
| Pongsatha 2005     | Vaginal misoprostol (Dose 50 mcg or more) vs Oral misoprostol tablet (dose 50mcg or more) | 166 | None with previous CS   | Not reported/ not clear | All intact              | All unfavourable (<6) | Mixed (includes preterm) | Singleton               | No description of allocation concealment or unclear description. High risk of bias.                                                            | Inpatient. | Not reported/ not clear.                                     |
| Poornima 2011      | No treatment vs Vaginal PGE2 (gel)                                                        | 100 | Not reported/ not clear | Mixed parity            | All ruptured            | Mixed                 | All > 37 weeks           | Singleton               | No description of allocation concealment or unclear description. High risk of bias.                                                            | Inpatient. | Not reported/ not clear.                                     |
| Poulsen 1991       | Intracervical PGE2 vs Vaginal PGE2 pessary (normal release)                               | 226 | None with previous CS   | Mixed parity            | Not reported/ not clear | All unfavourable (<6) | All > 37 weeks           | Singleton               | Report describes allocation concealment. Low risk of bias.                                                                                     | Inpatient. | Not reported/ not clear.                                     |

|             |                                                                                                          |     |                         |                         |                         |                         |                          |                         |                                                                                     |            |                                                              |
|-------------|----------------------------------------------------------------------------------------------------------|-----|-------------------------|-------------------------|-------------------------|-------------------------|--------------------------|-------------------------|-------------------------------------------------------------------------------------|------------|--------------------------------------------------------------|
| Prager 2008 | Vaginal PGE2 (gel) vs Vaginal misoprostol (Dose less than 50 mcg) vs Mechanical methods - foley catheter | 588 | None with previous CS   | Mixed parity            | Mixed                   | All unfavourable (<6)   | All > 37 weeks           | Not reported/ not clear | Report describes allocation concealment. Low risk of bias.                          | Inpatient. | Not reported/ not clear.                                     |
| Prasad 1989 | Placebo vs Vaginal PGE2 (pessary - slow release)                                                         | 69  | None with previous CS   | Nulliparous only        | Not reported/ not clear | All unfavourable (<6)   | All > 37 weeks           | Singleton               | Report describes allocation concealment. Low risk of bias.                          | Inpatient. | Some or all funding from pharmaceutical industry             |
| Prins 1983  | Placebo vs Vaginal PGE2 (gel)                                                                            | 30  | Not reported/ not clear | Not reported/ not clear | Not reported/ not clear | All unfavourable (<6)   | Not reported/ not clear  | Singleton               | Report describes allocation concealment. Low risk of bias.                          | Inpatient. | Not reported/ not clear.                                     |
| Puga 2001   | Vaginal misoprostol (Dose 50 mcg or more) vs Oral misoprostol tablet (dose 50mcg or more)                | 270 | None with previous CS   | Not reported/ not clear | All ruptured            | Not reported/ not clear | Mixed (includes preterm) | Singleton               | No description of allocation concealment or unclear description. High risk of bias. | Inpatient. | Not reported/ not clear.                                     |
| Rabl 2002   | Vaginal PGE2 (tablet) vs Vaginal PGE2 (pessary - slow release)                                           | 200 | Some with previous CS   | Mixed parity            | Mixed                   | Mixed                   | All > 37 weeks           | Singleton               | No description of allocation concealment or unclear description. High risk of bias. | Inpatient. | No pharmaceutical industry funding/ no conflicts of interest |
| Rahman 2013 | Vaginal misoprostol (Dose less than 50 mcg) vs Oral misoprostol tablet (dose 50mcg or more)              | 220 | None with previous CS   | Mixed parity            | Mixed                   | All unfavourable (<6)   | All > 37 weeks           | Singleton               | Report describes allocation concealment. Low risk of bias.                          | Inpatient. | Not reported/ not clear.                                     |
| Ramsey 2003 | Vaginal PGE2 (pessary - slow release) vs Intracervical PGE2 vs Vaginal misoprostol (Dose 50 mcg or more) | 111 | None with previous CS   | Mixed parity            | All intact              | All unfavourable (<6)   | Not reported/ not clear  | Singleton               | Report describes allocation concealment. Low risk of bias.                          | Inpatient. | Not reported/ not clear.                                     |
| Rath 1999   | Vaginal PGE2 (gel) vs Intracervical PGE2                                                                 | 468 | None with previous CS   | Mixed parity            | Mixed                   | All unfavourable (<6)   | All post-term            | Singleton               | Report describes allocation concealment. Low risk of bias.                          | Inpatient. | Not reported/ not clear.                                     |
| Rath 1999   | Vaginal PGE2 (tablet) vs Vaginal PGE2 (gel)                                                              | 328 | None with previous CS   | Mixed parity            | Mixed                   | All favourable (>6)     | All post-term            | Singleton               | Report describes allocation concealment. Low risk of bias.                          | Inpatient. | Not reported/ not clear.                                     |
| Rath 2007   | No treatment vs Oral misoprostol tablet (dose 50mcg or more)                                             | 300 | None with previous CS   | Mixed parity            | All ruptured            | Not reported/ not clear | All > 37 weeks           | Singleton               | No description of allocation concealment or unclear description. High risk of bias. | Inpatient. | Not reported/ not clear.                                     |

|                 |                                                                                             |     |                         |                         |                         |                         |                          |                         |                                                                                     |                              |                                                              |
|-----------------|---------------------------------------------------------------------------------------------|-----|-------------------------|-------------------------|-------------------------|-------------------------|--------------------------|-------------------------|-------------------------------------------------------------------------------------|------------------------------|--------------------------------------------------------------|
| Rayburn 1988    | Placebo vs Vaginal PGE2 (gel)                                                               | 118 | None with previous CS   | Mixed parity            | All intact              | All unfavourable (<6)   | All post-term            | Singleton               | Report describes allocation concealment. Low risk of bias.                          | One or both arms outpatient. | Not reported/ not clear.                                     |
| Rayburn 1992    | Placebo vs Vaginal PGE2 (pessary - slow release)                                            | 215 | None with previous CS   | Mixed parity            | All intact              | All unfavourable (<6)   | All > 37 weeks           | Singleton               | Report describes allocation concealment. Low risk of bias.                          | Inpatient.                   | Some or all funding from pharmaceutical industry             |
| Rayburn 1999    | No treatment vs Intracervical PGE2                                                          | 294 | All with previous CS    | Not reported/ not clear | All intact              | All unfavourable (<6)   | All > 37 weeks           | Not reported/ not clear | Report describes allocation concealment. Low risk of bias.                          | One or both arms outpatient. | Some or all funding from pharmaceutical industry             |
| Richardson 1991 | Placebo vs Intracervical PGE2                                                               | 48  | Not reported/ not clear | Not reported/ not clear | All intact              | All unfavourable (<6)   | All > 37 weeks           | Singleton               | Report describes allocation concealment. Low risk of bias.                          | Inpatient.                   | Not reported/ not clear.                                     |
| Rix 1996        | Vaginal PGE2 (tablet) vs Intracervical PGE2                                                 | 208 | Not reported/ not clear | Mixed parity            | Not reported/ not clear | All unfavourable (<6)   | Mixed (includes preterm) | Singleton               | Report describes allocation concealment. Low risk of bias.                          | Inpatient.                   | Not reported/ not clear.                                     |
| Rizvi 2007      | Vaginal misoprostol (Dose less than 50 mcg) vs Oral misoprostol tablet (dose 50mcg or more) | 59  | None with previous CS   | Mixed parity            | All ruptured            | All unfavourable (<6)   | Mixed (includes preterm) | Singleton               | No description of allocation concealment or unclear description. High risk of bias. | Inpatient.                   | Not reported/ not clear.                                     |
| Roach 1997      | No treatment vs Vaginal PGE2 pessary (normal release)                                       | 201 | Not reported/ not clear | Mixed parity            | Not reported/ not clear | Not reported/ not clear | All post-term            | Singleton               | Report describes allocation concealment. Low risk of bias.                          | One or both arms outpatient. | Not reported/ not clear.                                     |
| Rouzi 2014      | Vaginal PGE2 (pessary - slow release) vs Titrated (low dose) oral misoprostol solution      | 160 | None with previous CS   | Mixed parity            | Mixed                   | All unfavourable (<6)   | Mixed (includes preterm) | Singleton               | Report describes allocation concealment. Low risk of bias.                          | Inpatient.                   | No pharmaceutical industry funding/ no conflicts of interest |
| Rowlands 2001   | Vaginal PGE2 pessary (normal release) vs Vaginal misoprostol (Dose 50 mcg or more)          | 125 | None with previous CS   | Nulliparous only        | All intact              | All unfavourable (<6)   | All > 37 weeks           | Singleton               | Report describes allocation concealment. Low risk of bias.                          | One or both arms outpatient. | Not reported/ not clear.                                     |

|                    |                                                                                                                           |     |                         |              |                         |                       |                          |                         |                                                                                     |                              |                                                              |
|--------------------|---------------------------------------------------------------------------------------------------------------------------|-----|-------------------------|--------------|-------------------------|-----------------------|--------------------------|-------------------------|-------------------------------------------------------------------------------------|------------------------------|--------------------------------------------------------------|
| Rozenberg 2001     | Vaginal PGE2 (gel) vs Vaginal misoprostol (Dose 50 mcg or more)                                                           | 369 | None with previous CS   | Mixed parity | Mixed                   | All unfavourable (<6) | All > 37 weeks           | Singleton               | Report describes allocation concealment. Low risk of bias.                          | Inpatient.                   | No pharmaceutical industry funding/ no conflicts of interest |
| Rozenberg 2004     | Vaginal PGE2 (pessary - slow release) vs Vaginal misoprostol (Dose 50 mcg or more)                                        | 140 | None with previous CS   | Mixed parity | All intact              | All unfavourable (<6) | All > 37 weeks           | Singleton               | Report describes allocation concealment. Low risk of bias.                          | Inpatient.                   | Not reported/ not clear.                                     |
| Saeed 2011         | Vaginal PGE2 (tablet) vs Vaginal misoprostol (Dose 50 mcg or more)                                                        | 200 | None with previous CS   | Mixed parity | Not reported/ not clear | All unfavourable (<6) | All > 37 weeks           | Singleton               | Report describes allocation concealment. Low risk of bias.                          | Inpatient.                   | Not reported/ not clear.                                     |
| Saggaf 2001        | Vaginal PGE2 (gel) vs Vaginal misoprostol (Dose 50 mcg or more)                                                           | 57  | None with previous CS   | Mixed parity | All intact              | All unfavourable (<6) | All > 37 weeks           | Singleton               | Report describes allocation concealment. Low risk of bias.                          | Inpatient.                   | Not reported/ not clear.                                     |
| Sahraoui 2005      | No treatment vs Intracervical PGE2                                                                                        | 150 | Not reported/ not clear | Mixed parity | All intact              | All unfavourable (<6) | All post-term            | Not reported/ not clear | No description of allocation concealment or unclear description. High risk of bias. | One or both arms outpatient. | Not reported/ not clear.                                     |
| Sahu 2004          | Intracervical PGE2 vs Vaginal misoprostol (Dose 50 mcg or more)                                                           | 50  | None with previous CS   | Mixed parity | All intact              | All unfavourable (<6) | All > 37 weeks           | Singleton               | No description of allocation concealment or unclear description. High risk of bias. | Inpatient.                   | Not reported/ not clear.                                     |
| Saleem 2006        | Vaginal PGE2 pessary (normal release) vs Vaginal misoprostol (Dose 50 mcg or more) vs Mechanical methods - foley catheter | 226 | None with previous CS   | Mixed parity | Not reported/ not clear | All unfavourable (<6) | All > 37 weeks           | Singleton               | No description of allocation concealment or unclear description. High risk of bias. | Inpatient.                   | Not reported/ not clear.                                     |
| Sanchez-Ramos 1998 | Vaginal PGE2 (pessary - slow release) vs Vaginal misoprostol (Dose 50 mcg or more)                                        | 223 | None with previous CS   | Mixed parity | Mixed                   | Mixed                 | Mixed (includes preterm) | Singleton               | Report describes allocation concealment. Low risk of bias.                          | Inpatient.                   | Not reported/ not clear.                                     |
| Sawai 1991         | Placebo vs Vaginal PGE2 (gel)                                                                                             | 50  | None with previous CS   | Mixed parity | All intact              | Mixed                 | All post-term            | Singleton               | Report describes allocation concealment. Low risk of bias.                          | One or both arms outpatient. | Not reported/ not clear.                                     |
| Sawai 1994         | Placebo vs Vaginal PGE2 pessary (normal release)                                                                          | 80  | None with previous CS   | Mixed parity | All intact              | Mixed                 | All post-term            | Not reported/ not clear | No description of allocation concealment or unclear description. High risk of bias. | One or both arms outpatient. | Not reported/ not clear.                                     |

|                |                                                                                                                                                                                      |     |                         |                         |                         |                         |                          |                         |                                                                                     |            |                          |
|----------------|--------------------------------------------------------------------------------------------------------------------------------------------------------------------------------------|-----|-------------------------|-------------------------|-------------------------|-------------------------|--------------------------|-------------------------|-------------------------------------------------------------------------------------|------------|--------------------------|
| Saxena 2011    | Intracervical PGE2 vs Vaginal misoprostol (Dose less than 50 mcg) vs Vaginal misoprostol (Dose 50 mcg or more)                                                                       | 210 | None with previous CS   | Mixed parity            | All intact              | All unfavourable (<6)   | All > 37 weeks           | Singleton               | No description of allocation concealment or unclear description. High risk of bias. | Inpatient. | Not reported/ not clear. |
| Schneider 2004 | Vaginal misoprostol (Dose less than 50 mcg) vs Oral misoprostol tablet (dose 50mcg or more)                                                                                          | 296 | Not reported/ not clear  | Not reported/ not clear | No description of allocation concealment or unclear description. High risk of bias. | Inpatient. | Not reported/ not clear. |
| Seeras 1995    | Vaginal PGE2 (gel) vs Intracervical PGE2                                                                                                                                             | 68  | None with previous CS   | Mixed parity            | All intact              | Not reported/ not clear | All > 37 weeks           | Not reported/ not clear | Report describes allocation concealment. Low risk of bias.                          | Inpatient. | Not reported/ not clear. |
| Shakya 2010    | Intracervical PGE2 vs Vaginal misoprostol (Dose 50 mcg or more) vs Intracervical PGE2 vs Vaginal misoprostol (Dose less than 50 mcg) vs Oral misoprostol tablet (dose 50mcg or more) | 66  | None with previous CS   | Mixed parity            | All intact              | All unfavourable (<6)   | All > 37 weeks           | Not reported/ not clear | No description of allocation concealment or unclear description. High risk of bias. | Inpatient. | Not reported/ not clear. |
| Sheela 2007    | Vaginal misoprostol (Dose less than 50 mcg) vs Oral misoprostol tablet (dose 50mcg or more) vs Mechanical methods - foley catheter                                                   | 150 | None with previous CS   | Mixed parity            | All intact              | All unfavourable (<6)   | All > 37 weeks           | Singleton               | No description of allocation concealment or unclear description. High risk of bias. | Inpatient. | Not reported/ not clear. |
| Sheikher 2009  | Mechanical methods - foley catheter                                                                                                                                                  | 90  | None with previous CS   | Mixed parity            | Mixed                   | All unfavourable (<6)   | All > 37 weeks           | Singleton               | No description of allocation concealment or unclear description. High risk of bias. | Inpatient. | Not reported/ not clear. |
| Shetty 2001    | Vaginal misoprostol (Dose 50 mcg or more) vs Oral misoprostol tablet (dose 50mcg or more)                                                                                            | 245 | None with previous CS   | Mixed parity            | Not reported/ not clear | Mixed                   | All > 37 weeks           | Singleton               | Report describes allocation concealment. Low risk of bias.                          | Inpatient. | Not reported/ not clear. |
| Shetty 2002 a  | No treatment vs Oral misoprostol tablet (dose 50mcg or more)                                                                                                                         | 61  | None with previous CS   | Mixed parity            | All ruptured            | Not reported/ not clear | Mixed (includes preterm) | Singleton               | Report describes allocation concealment. Low risk of bias.                          | Inpatient. | Not reported/ not clear. |
| Shetty 2003    | Vaginal misoprostol (Dose less than 50 mcg) vs Oral misoprostol tablet (dose 50mcg or more)                                                                                          | 101 | None with previous CS   | Mixed parity            | All intact              | Mixed                   | All > 37 weeks           | Singleton               | Report describes allocation concealment. Low risk of bias.                          | Inpatient. | Not reported/ not clear. |
| Shetty 2004    | Vaginal PGE2 (tablet) vs Oral misoprostol tablet (dose 50mcg or more)                                                                                                                | 200 | None with previous CS   | Mixed parity            | All intact              | Mixed                   | All > 37 weeks           | Singleton               | Report describes allocation concealment. Low risk of bias.                          | Inpatient. | Not reported/ not clear. |
| Shoaib 1994    | No treatment vs Vaginal PGE2 (tablet)                                                                                                                                                | 200 | None with previous CS   | Nulliparous only        | All ruptured            | All unfavourable (<6)   | All > 37 weeks           | Not reported/ not clear | No description of allocation concealment or unclear description. High risk of bias. | Inpatient. | Not reported/ not clear. |

|                        |                                                                                              |     |                         |                         |                         |                       |                          |                         |                                                                                     |                              |                                                              |
|------------------------|----------------------------------------------------------------------------------------------|-----|-------------------------|-------------------------|-------------------------|-----------------------|--------------------------|-------------------------|-------------------------------------------------------------------------------------|------------------------------|--------------------------------------------------------------|
| Sifakis 2007           | Vaginal PGE2 (tablet) vs Vaginal misoprostol (Dose 50 mcg or more)                           | 415 | None with previous CS   | Mixed parity            | All intact              | All unfavourable (<6) | All > 37 weeks           | Singleton               | Report describes allocation concealment. Low risk of bias.                          | Inpatient.                   | Not reported/ not clear.                                     |
| Sitthiwattanawong 1999 | Vaginal misoprostol (Dose 50 mcg or more) vs Oral misoprostol tablet (dose 50mcg or more)    | 131 | None with previous CS   | Mixed parity            | Not reported/ not clear | All unfavourable (<6) | Mixed (includes preterm) | Singleton               | No description of allocation concealment or unclear description. High risk of bias. | Inpatient.                   | Not reported/ not clear.                                     |
| Smith 1990             | Vaginal PGE2 (gel) vs Vaginal PGE2 pessary (normal release)                                  | 69  | Not reported/ not clear | Mixed parity            | All intact              | All unfavourable (<6) | Mixed (includes preterm) | Not reported/ not clear | No description of allocation concealment or unclear description. High risk of bias. | Inpatient.                   | Not reported/ not clear.                                     |
| Smith 1994             | Vaginal PGE2 (gel) vs Vaginal PGE2 (pessary - slow release)                                  | 121 | Not reported/ not clear | Not reported/ not clear | All intact              | All unfavourable (<6) | All > 37 weeks           | Not reported/ not clear | No description of allocation concealment or unclear description. High risk of bias. | Inpatient.                   | Not reported/ not clear.                                     |
| Souza 2013             | Vaginal misoprostol (Dose less than 50 mcg) vs Titrated (low dose) oral misoprostol solution | 200 | None with previous CS   | Mixed parity            | Mixed                   | All unfavourable (<6) | All > 37 weeks           | Singleton               | Report describes allocation concealment. Low risk of bias.                          | Inpatient.                   | No pharmaceutical industry funding/ no conflicts of interest |
| Srisomboon 1996        | Placebo vs Vaginal misoprostol (Dose 50 mcg or more)                                         | 62  | None with previous CS   | Mixed parity            | All intact              | All unfavourable (<6) | Mixed (includes preterm) | Singleton               | No description of allocation concealment or unclear description. High risk of bias. | Inpatient.                   | Not reported/ not clear.                                     |
| Stampe Sorensen 1992   | Vaginal PGE2 (tablet) vs Vaginal PGE2 pessary (normal release)                               | 267 | Not reported/ not clear | Mixed parity            | Not reported/ not clear | Mixed                 | Mixed (includes preterm) | Not reported/ not clear | No description of allocation concealment or unclear description. High risk of bias. | Inpatient.                   | Not reported/ not clear.                                     |
| Stempel 1997           | Vaginal PGE2 (gel) vs Intracervical PGE2                                                     | 83  | Not reported/ not clear | Mixed parity            | Not reported/ not clear | All unfavourable (<6) | Not reported/ not clear  | Singleton               | No description of allocation concealment or unclear description. High risk of bias. | Inpatient.                   | No pharmaceutical industry funding/ no conflicts of interest |
| Steytler 1995          | Vaginal PGE2 (gel) vs Vaginal misoprostol (Dose 50 mcg or more)                              | 30  | None with previous CS   | Not reported/ not clear | All intact              | All unfavourable (<6) | All > 37 weeks           | Singleton               | No description of allocation concealment or unclear description. High risk of bias. | Inpatient.                   | Not reported/ not clear.                                     |
| Stitely 2000           | Placebo vs Vaginal misoprostol (Dose less than 50 mcg)                                       | 60  | None with previous CS   | Mixed parity            | All intact              | All unfavourable (<6) | All post-term            | Singleton               | Report describes allocation concealment. Low risk of bias.                          | One or both arms outpatient. | No pharmaceutical industry funding/ no conflicts of interest |

|                      |                                                                                           |     |                         |                         |                         |                       |                          |                         |                                                                                     |                              |                                                              |
|----------------------|-------------------------------------------------------------------------------------------|-----|-------------------------|-------------------------|-------------------------|-----------------------|--------------------------|-------------------------|-------------------------------------------------------------------------------------|------------------------------|--------------------------------------------------------------|
| Strobel 2006         | Vaginal PGE2 (pessary - slow release) vs Intracervical PGE2                               | 107 | None with previous CS   | Mixed parity            | All intact              | All unfavourable (<6) | All > 37 weeks           | Singleton               | No description of allocation concealment or unclear description. High risk of bias. | Inpatient.                   | Not reported/ not clear.                                     |
| Sultana 2006         | Vaginal misoprostol (Dose 50 mcg or more) vs Oral misoprostol tablet (dose 50mcg or more) | 100 | None with previous CS   | Mixed parity            | Not reported/ not clear | All unfavourable (<6) | All > 37 weeks           | Singleton               | No description of allocation concealment or unclear description. High risk of bias. | Inpatient.                   | Not reported/ not clear.                                     |
| Surbek 1997          | Vaginal PGE2 (tablet) vs Vaginal misoprostol (Dose 50 mcg or more)                        | 100 | None with previous CS   | Mixed parity            | Mixed                   | All unfavourable (<6) | All > 37 weeks           | Singleton               | Report describes allocation concealment. Low risk of bias.                          | Inpatient.                   | Not reported/ not clear.                                     |
| Tabor 1995           | Intracervical PGE2 vs Vaginal misoprostol (Dose 50 mcg or more)                           | 127 | Not reported/ not clear | Not reported/ not clear | Not reported/ not clear | All unfavourable (<6) | Not reported/ not clear  | Not reported/ not clear | No description of allocation concealment or unclear description. High risk of bias. | Inpatient.                   | Not reported/ not clear.                                     |
| Taechakraichana 1996 | Intracervical PGE2 vs Vaginal PGE2 pessary (normal release)                               | 19  | None with previous CS   | Mixed parity            | All intact              | All unfavourable (<6) | Not reported/ not clear  | Singleton               | No description of allocation concealment or unclear description. High risk of bias. | Inpatient.                   | No pharmaceutical industry funding/ no conflicts of interest |
| Taher 2010           | Vaginal PGE2 (tablet) vs Vaginal PGE2 (gel)                                               | 165 | None with previous CS   | Mixed parity            | Mixed                   | All unfavourable (<6) | All > 37 weeks           | Mixed                   | Report describes allocation concealment. Low risk of bias.                          | Inpatient.                   | No pharmaceutical industry funding/ no conflicts of interest |
| Tan 2010             | Vaginal PGE2 pessary (normal release) vs Vaginal misoprostol (Dose less than 50 mcg)      | 169 | None with previous CS   | Mixed parity            | Not reported/ not clear | All unfavourable (<6) | All > 37 weeks           | Singleton               | No description of allocation concealment or unclear description. High risk of bias. | Inpatient.                   | Not reported/ not clear.                                     |
| Tessier 1997         | Vaginal PGE2 (gel) vs Oral misoprostol tablet (dose 50mcg or more)                        | 267 | Some with previous CS   | Mixed parity            | Mixed                   | Mixed                 | Mixed (includes preterm) | Mixed                   | Report describes allocation concealment. Low risk of bias.                          | One or both arms outpatient. | Not reported/ not clear.                                     |
| Tey 1995             | No treatment vs Intracervical PGE2                                                        | 40  | Not reported/ not clear | Not reported/ not clear | Not reported/ not clear | Mixed                 | All > 37 weeks           | Not reported/ not clear | No description of allocation concealment or unclear description. High risk of bias. | Inpatient.                   | Not reported/ not clear.                                     |



|                  |                                                                                               |     |                         |              |                         |                         |                          |                         |                                                                                     |            |                                                              |
|------------------|-----------------------------------------------------------------------------------------------|-----|-------------------------|--------------|-------------------------|-------------------------|--------------------------|-------------------------|-------------------------------------------------------------------------------------|------------|--------------------------------------------------------------|
| Thaisomboon 2012 | Oral misoprostol tablet (dose 50mcg or more) vs Titrated (low dose) oral misoprostol solution | 64  | None with previous CS   | Mixed parity | All intact              | All unfavourable (<6)   | All post-term            | Singleton               | Report describes allocation concealment. Low risk of bias.                          | Inpatient. | No pharmaceutical industry funding/ no conflicts of interest |
| Thavarahsah 1990 | Vaginal PGE2 (tablet) vs Intracervical PGE2                                                   | 200 | None with previous CS   | Mixed parity | Not reported/ not clear | All unfavourable (<6)   | All > 37 weeks           | Singleton               | Report describes allocation concealment. Low risk of bias.                          | Inpatient. | Not reported/ not clear.                                     |
| Thiery 1984      | Placebo vs Vaginal PGE2 (tablet) vs Intracervical PGE2                                        | 121 | None with previous CS   | Mixed parity | All intact              | All unfavourable (<6)   | All > 37 weeks           | Singleton               | Report describes allocation concealment. Low risk of bias.                          | Inpatient. | Not reported/ not clear.                                     |
| Thomas 2000      | Placebo vs Vaginal misoprostol (Dose 50 mcg or more)                                          | 52  | Not reported/ not clear | Mixed parity | All ruptured            | Not reported/ not clear | Mixed (includes preterm) | Not reported/ not clear | No description of allocation concealment or unclear description. High risk of bias. | Inpatient. | Not reported/ not clear.                                     |
| Tomlinson 2001   | Vaginal PGE2 (gel) vs Vaginal PGE2 (pessary - slow release)                                   | 69  | None with previous CS   | Mixed parity | All intact              | Mixed                   | Mixed (includes preterm) | Not reported/ not clear | Report describes allocation concealment. Low risk of bias.                          | Inpatient. | Not reported/ not clear.                                     |
| Topozada 1997    | Vaginal misoprostol (Dose 50 mcg or more) vs Oral misoprostol tablet (dose 50mcg or more)     | 40  | Not reported/ not clear | Mixed parity | Not reported/ not clear | All unfavourable (<6)   | All > 37 weeks           | Singleton               | No description of allocation concealment or unclear description. High risk of bias. | Inpatient. | Not reported/ not clear.                                     |
| Trabelsi 2012    | Intracervical PGE2 vs Vaginal misoprostol (Dose 50 mcg or more)                               | 300 | None with previous CS   | Mixed parity | Mixed                   | All unfavourable (<6)   | Mixed (includes preterm) | Singleton               | No description of allocation concealment or unclear description. High risk of bias. | Inpatient. | Not reported/ not clear.                                     |
| Triglia 2010     | Vaginal PGE2 (gel) vs Vaginal PGE2 (pessary - slow release)                                   | 130 | None with previous CS   | Mixed parity | All intact              | All unfavourable (<6)   | All > 37 weeks           | Singleton               | No description of allocation concealment or unclear description. High risk of bias. | Inpatient. | No pharmaceutical industry funding/ no conflicts of interest |
| Trofatter 1985   | Placebo vs Intracervical PGE2                                                                 | 59  | None with previous CS   | Mixed parity | All intact              | All unfavourable (<6)   | Mixed (includes preterm) | Not reported/ not clear | No description of allocation concealment or unclear description. High risk of bias. | Inpatient. | Some or all funding from pharmaceutical industry             |
| Trofatter 1993   | No treatment vs Intracervical PGE2                                                            | 488 | None with previous CS   | Mixed parity | Not reported/ not clear | All unfavourable (<6)   | All > 37 weeks           | Mixed                   | Report describes allocation concealment. Low risk of bias.                          | Inpatient. | Some or all funding from pharmaceutical industry             |
| Troostwijk 1992  | Placebo vs Intracervical PGE2                                                                 | 139 | None with previous CS   | Mixed parity | All intact              | All unfavourable (<6)   | Mixed (includes preterm) | Singleton               | Report describes allocation concealment. Low risk of bias.                          | Inpatient. | Some or all funding from pharmaceutical industry             |

|                  |                                                                                             |     |                            |                            |                            |                            |                          |                            |                                                                                     |                             |                                                  |
|------------------|---------------------------------------------------------------------------------------------|-----|----------------------------|----------------------------|----------------------------|----------------------------|--------------------------|----------------------------|-------------------------------------------------------------------------------------|-----------------------------|--------------------------------------------------|
| Ulmsten 1983     | Placebo vs Intracervical PGE2                                                               | 50  | None with previous CS      | Nulliparous only           | Not reported/<br>not clear | Not reported/<br>not clear | All > 37 weeks           | Not reported/<br>not clear | Report describes allocation concealment. Low risk of bias.                          | Inpatient.                  | Not reported/<br>not clear.                      |
| Ulmsten 1985     | Placebo vs Intracervical PGE2 vs Vaginal PGE2 pessary (normal release)                      | 58  | Not reported/<br>not clear | Nulliparous only           | Not reported/<br>not clear | All unfavourable (<6)      | All > 37 weeks           | Not reported/<br>not clear | Report describes allocation concealment. Low risk of bias.                          | Inpatient.                  | Not reported/<br>not clear.                      |
| Uludag 2005      | Vaginal misoprostol (Dose 50 mcg or more) vs Oral misoprostol tablet (dose 50mcg or more)   | 99  | None with previous CS      | Mixed parity               | Mixed                      | All unfavourable (<6)      | Mixed (includes preterm) | Singleton                  | No description of allocation concealment or unclear description. High risk of bias. | Inpatient.                  | Not reported/<br>not clear.                      |
| Van Germund 2004 | Vaginal PGE2 (gel) vs Vaginal misoprostol (Dose less than 50 mcg)                           | 681 | Some with previous CS      | Mixed parity               | Mixed                      | All unfavourable (<6)      | Mixed (includes preterm) | Mixed                      | Report describes allocation concealment. Low risk of bias.                          | Inpatient.                  | Not reported/<br>not clear.                      |
| Varaklis 1995    | Intracervical PGE2 vs Vaginal misoprostol (Dose less than 50 mcg)                           | 69  | None with previous CS      | Mixed parity               | Not reported/<br>not clear | All unfavourable (<6)      | All > 37 weeks           | Singleton                  | Report describes allocation concealment. Low risk of bias.                          | Inpatient.                  | Some or all funding from pharmaceutical industry |
| Wang 1998        | Vaginal misoprostol (Dose less than 50 mcg) vs Vaginal misoprostol (Dose 50 mcg or more)    | 48  | Not reported/<br>not clear | Not reported/<br>not clear | All intact                 | Not reported/<br>not clear | All > 37 weeks           | Singleton                  | No description of allocation concealment or unclear description. High risk of bias. | Not reported/<br>not clear. | Not reported/<br>not clear.                      |
| Wieland 1999     | Vaginal PGE2 (pessary - slow release) vs Intracervical PGE2                                 | 66  | None with previous CS      | Mixed parity               | All intact                 | All unfavourable (<6)      | All > 37 weeks           | Not reported/<br>not clear | Report describes allocation concealment. Low risk of bias.                          | Inpatient.                  | Not reported/<br>not clear.                      |
| Wielgos 2007     | Vaginal PGE2 (pessary - slow release) vs Intracervical PGE2                                 | 128 | Not reported/<br>not clear | Mixed parity               | Not reported/<br>not clear | All unfavourable (<6)      | Mixed (includes preterm) | Singleton                  | No description of allocation concealment or unclear description. High risk of bias. | Inpatient.                  | Not reported/<br>not clear.                      |
| Wing 1995 a      | Intracervical PGE2 vs Vaginal misoprostol (Dose 50 mcg or more)                             | 135 | None with previous CS      | Mixed parity               | All intact                 | All unfavourable (<6)      | Mixed (includes preterm) | Singleton                  | Report describes allocation concealment. Low risk of bias.                          | Inpatient.                  | Not reported/<br>not clear.                      |
| Wing 1995 b      | Intracervical PGE2 vs Vaginal misoprostol (Dose less than 50 mcg)                           | 275 | None with previous CS      | Mixed parity               | All intact                 | All unfavourable (<6)      | Mixed (includes preterm) | Singleton                  | Report describes allocation concealment. Low risk of bias.                          | Inpatient.                  | Not reported/<br>not clear.                      |
| Wing 1997        | Vaginal PGE2 (pessary - slow release) vs Vaginal misoprostol (Dose less than 50 mcg)        | 197 | None with previous CS      | Not reported/<br>not clear | All intact                 | All unfavourable (<6)      | Mixed (includes preterm) | Singleton                  | Report describes allocation concealment. Low risk of bias.                          | Inpatient.                  | Not reported/<br>not clear.                      |
| Wing 1999        | Vaginal misoprostol (Dose less than 50 mcg) vs Oral misoprostol tablet (dose 50mcg or more) | 220 | None with previous CS      | Mixed parity               | All intact                 | All unfavourable (<6)      | Mixed (includes preterm) | Singleton                  | Report describes allocation concealment. Low risk of bias.                          | Inpatient.                  | Not reported/<br>not clear.                      |

|                 |                                                                                                                       |      |                         |                         |                         |                         |                          |                         |                                                                                     |            |                                                              |
|-----------------|-----------------------------------------------------------------------------------------------------------------------|------|-------------------------|-------------------------|-------------------------|-------------------------|--------------------------|-------------------------|-------------------------------------------------------------------------------------|------------|--------------------------------------------------------------|
| Wing 2000       | Vaginal misoprostol (Dose less than 50 mcg) vs Oral misoprostol tablet (dose 50mcg or more)                           | 234  | None with previous CS   | Mixed parity            | Mixed                   | Mixed                   | Mixed (includes preterm) | Singleton               | Report describes allocation concealment. Low risk of bias.                          | Inpatient. | Not reported/ not clear.                                     |
| Wing 2008       | Vaginal PGE2 (pessary - slow release) vs Sustained release misoprostol insert                                         | 1307 | None with previous CS   | Mixed parity            | Mixed                   | All unfavourable (<6)   | Mixed (includes preterm) | Singleton               | Report describes allocation concealment. Low risk of bias.                          | Inpatient. | No pharmaceutical industry funding/ no conflicts of interest |
| Wing 2013       | Vaginal PGE2 (pessary - slow release) vs Sustained release misoprostol insert                                         | 1358 | None with previous CS   | Mixed parity            | Not reported/ not clear | All unfavourable (<6)   | Mixed (includes preterm) | Singleton               | No description of allocation concealment or unclear description. High risk of bias. | Inpatient. | Some or all funding from pharmaceutical industry             |
| Witter 1992     | Placebo vs Vaginal PGE2 (pessary - slow release)                                                                      | 72   | None with previous CS   | Mixed parity            | All intact              | All unfavourable (<6)   | All > 37 weeks           | Singleton               | Report describes allocation concealment. Low risk of bias.                          | Inpatient. | Some or all funding from pharmaceutical industry             |
| Witter 1996     | Placebo vs Vaginal PGE2 (pessary - slow release)                                                                      | 206  | None with previous CS   | Mixed parity            | All intact              | All unfavourable (<6)   | All > 37 weeks           | Singleton               | Report describes allocation concealment. Low risk of bias.                          | Inpatient. | Some or all funding from pharmaceutical industry             |
| Yazdani 2012    | Placebo vs Oral misoprostol tablet (dose 50mcg or more)                                                               | 99   | Not reported/ not clear | Not reported/ not clear | All ruptured            | Not reported/ not clear | All > 37 weeks           | Not reported/ not clear | No description of allocation concealment or unclear description. High risk of bias. | Inpatient. | Not reported/ not clear.                                     |
| Yuen 1996       | Intracervical PGE2 vs Vaginal PGE2 pessary (normal release) vs Mechanical methods - Double balloon or Cook's catheter | 119  | Some with previous CS   | Mixed parity            | All intact              | All unfavourable (<6)   | Mixed (includes preterm) | Singleton               | Report describes allocation concealment. Low risk of bias.                          | Inpatient. | Not reported/ not clear.                                     |
| Zanconato 2011  | Vaginal PGE2 (gel) vs Vaginal PGE2 (pessary - slow release)                                                           | 52   | None with previous CS   | Nulliparous only        | All intact              | All unfavourable (<6)   | All > 37 weeks           | Singleton               | No description of allocation concealment or unclear description. High risk of bias. | Inpatient. | No pharmaceutical industry funding/ no conflicts of interest |
| Zanini 1990     | Vaginal PGE2 (gel) vs Intracervical PGE2                                                                              | 100  | None with previous CS   | Mixed parity            | All intact              | All unfavourable (<6)   | Mixed (includes preterm) | Singleton               | No description of allocation concealment or unclear description. High risk of bias. | Inpatient. | Not reported/ not clear.                                     |
| Zvandasara 2008 | Vaginal misoprostol (Dose 50 mcg or more) vs Titrated (low dose) oral misoprostol solution                            | 134  | None with previous CS   | Mixed parity            | Mixed                   | Not reported/ not clear | Mixed (includes preterm) | Singleton               | Report describes allocation concealment. Low risk of bias.                          | Inpatient. | Not reported/ not clear.                                     |
