# Supplementary material
Source: PubMed Central journal article supplement (PMC4794072)
Supplement: alfz022734.w6_default.pdf [file alfz022734.w6_default.pdf]

## Appendix 6: Tables

### Abbreviations used in the appendix.

95%*CrIs*: 95% credible intervals

C-section: caesarean section

Fav: favourable

FE: fixed effect

Multi-only: multiparous only

Nulli-only: nulliparous only

NR: not reported

RE: random effect

SD: standard deviation

Unfav: unfavourable

**Table 1a: Characteristics of trials containing each treatment: Vaginal delivery within 24 hours**

|                               | Previous c-section exc. |      |      |      | Parity |            |       |            | Membranes |        |       |          |
|-------------------------------|-------------------------|------|------|------|--------|------------|-------|------------|-----------|--------|-------|----------|
|                               | NR                      | None | Some | All  | NR     | Nulli-only | Mixed | Multi-only | NR        | Intact | Mixed | Ruptured |
| Placebo                       | 0%                      | 29%  | 71%  | 0%   | 71%    | 0%         | 0%    | 29%        | 29%       | 71%    | 0%    | 0%       |
| No treatment                  | 25%                     | 0%   | 25%  | 50%  | 0%     | 25%        | 0%    | 75%        | 0%        | 100%   | 0%    | 25%      |
| VagPGE <sub>2</sub> tablet    | 0%                      | 22%  | 67%  | 11%  | 33%    | 44%        | 22%   | 0%         | 11%       | 78%    | 11%   | 0%       |
| VagPGE <sub>2</sub> gel       | 5%                      | 10%  | 50%  | 35%  | 10%    | 35%        | 50%   | 5%         | 5%        | 85%    | 10%   | 5%       |
| VagPGE <sub>2</sub> pessarySR | 0%                      | 7%   | 36%  | 57%  | 14%    | 50%        | 36%   | 0%         | 0%        | 79%    | 21%   | 0%       |
| cxPGE <sub>2</sub>            | 3%                      | 11%  | 50%  | 37%  | 32%    | 50%        | 16%   | 3%         | 13%       | 76%    | 11%   | 3%       |
| VagPGE <sub>2</sub> pessary   | 20%                     | 0%   | 40%  | 40%  | 80%    | 20%        | 0%    | 0%         | 40%       | 40%    | 20%   | 20%      |
| VagMiso<50mcg                 | 0%                      | 3%   | 55%  | 41%  | 14%    | 38%        | 41%   | 7%         | 0%        | 93%    | 7%    | 0%       |
| VagMiso>50mcg                 | 0%                      | 7%   | 62%  | 31%  | 7%     | 59%        | 34%   | 0%         | 0%        | 90%    | 10%   | 0%       |
| OMiso<50mcg                   | 0%                      | 0%   | 100% | 0%   | 0%     | 0%         | 50%   | 50%        | 0%        | 50%    | 50%   | 0%       |
| OMiso>50mcg                   | 0%                      | 4%   | 58%  | 38%  | 4%     | 50%        | 21%   | 25%        | 0%        | 96%    | 4%    | 0%       |
| TitroMiso                     | 0%                      | 14%  | 29%  | 57%  | 0%     | 29%        | 71%   | 0%         | 0%        | 100%   | 0%    | 0%       |
| VagMisopessarySR              | 0%                      | 0%   | 0%   | 100% | 50%    | 0%         | 50%   | 0%         | 0%        | 100%   | 0%    | 0%       |

**Table 1b: Characteristics of trials containing each treatment: Vaginal delivery within 24 hours**

|                               | Cervix |     |       |       | Gestation |               |               |       | Singleton/Multiple Pregnancy |           |       | Risk of bias |          |
|-------------------------------|--------|-----|-------|-------|-----------|---------------|---------------|-------|------------------------------|-----------|-------|--------------|----------|
|                               | NR     | Fav | Mixed | Unfav | NR        | All post-Term | All >37 weeks | Mixed | NR                           | Singleton | Mixed | Low (1)      | High (2) |
| Placebo                       | 29%    | 29% | 43%   | 0%    | 43%       | 0%            | 0%            | 57%   | 43%                          | 57%       | 0%    | 86%          | 14%      |
| Notreatment                   | 0%     | 0%  | 50%   | 50%   | 50%       | 0%            | 50%           | 0%    | 0%                           | 100%      | 0%    | 50%          | 50%      |
| VagPGE <sub>2</sub> tablet    | 0%     | 33% | 67%   | 0%    | 0%        | 11%           | 22%           | 67%   | 0%                           | 100%      | 0%    | 44%          | 56%      |
| VagPGE <sub>2</sub> gel       | 5%     | 5%  | 85%   | 5%    | 0%        | 5%            | 15%           | 80%   | 10%                          | 80%       | 10%   | 85%          | 15%      |
| VagPGE <sub>2</sub> pessarySR | 7%     | 14% | 79%   | 0%    | 0%        | 0%            | 29%           | 71%   | 0%                           | 93%       | 7%    | 64%          | 36%      |
| cxPGE <sub>2</sub>            | 8%     | 11% | 82%   | 0%    | 5%        | 0%            | 16%           | 79%   | 13%                          | 87%       | 0%    | 55%          | 45%      |
| VagPGE <sub>2</sub> pessary   | 0%     | 20% | 80%   | 0%    | 0%        | 0%            | 0%            | 100%  | 20%                          | 80%       | 0%    | 60%          | 40%      |
| VagMiso<50mcg                 | 3%     | 0%  | 97%   | 0%    | 0%        | 0%            | 10%           | 90%   | 3%                           | 90%       | 7%    | 66%          | 34%      |
| VagMiso>50mcg                 | 0%     | 7%  | 93%   | 0%    | 0%        | 0%            | 14%           | 86%   | 0%                           | 97%       | 3%    | 62%          | 38%      |
| OMiso<50mcg                   | 0%     | 0%  | 100%  | 0%    | 0%        | 0%            | 0%            | 100%  | 0%                           | 100%      | 0%    | 100%         | 0%       |
| OMiso>50mcg                   | 0%     | 0%  | 96%   | 4%    | 13%       | 0%            | 21%           | 67%   | 13%                          | 88%       | 0%    | 79%          | 21%      |
| TitroMiso                     | 0%     | 0%  | 100%  | 0%    | 0%        | 0%            | 14%           | 86%   | 0%                           | 100%      | 0%    | 100%         | 0%       |
| VagMisopessarySR              | 0%     | 0%  | 100%  | 0%    | 0%        | 0%            | 0%            | 100%  | 0%                           | 100%      | 0%    | 50%          | 50%      |

**Table 2a: Characteristics of trials containing each treatment: Caesarean Section**

|                               | Previous c-section exc. |      |      |     | Parity |           |       |            | Membranes |        |       |          |
|-------------------------------|-------------------------|------|------|-----|--------|-----------|-------|------------|-----------|--------|-------|----------|
|                               | NR                      | None | Some | All | NR     | Null-only | Mixed | Multi-only | NR        | Intact | Mixed | Ruptured |
| Placebo                       | 27%                     | 63%  | 3%   | 7%  | 20%    | 7%        | 67%   | 7%         | 13%       | 40%    | 0%    | 47%      |
| Notreatment                   | 39%                     | 55%  | 5%   | 0%  | 13%    | 13%       | 75%   | 0%         | 34%       | 45%    | 5%    | 16%      |
| VagPGE <sub>2</sub> tablet    | 32%                     | 65%  | 3%   | 0%  | 3%     | 26%       | 65%   | 6%         | 39%       | 45%    | 13%   | 3%       |
| VagPGE <sub>2</sub> gel       | 33%                     | 58%  | 10%  | 0%  | 10%    | 10%       | 78%   | 3%         | 19%       | 45%    | 25%   | 11%      |
| VagPGE <sub>2</sub> pessarySR | 24%                     | 67%  | 9%   | 0%  | 9%     | 15%       | 73%   | 3%         | 21%       | 52%    | 21%   | 6%       |
| VagPGF <sub>2</sub> gel       | 60%                     | 40%  | 0%   | 0%  | 0%     | 20%       | 80%   | 0%         | 80%       | 20%    | 0%    | 0%       |
| cxPGE <sub>2</sub>            | 30%                     | 31%  | 36%  | 2%  | 14%    | 5%        | 81%   | 0%         | 27%       | 57%    | 11%   | 5%       |
| VagPGE <sub>2</sub> pessary   | 48%                     | 48%  | 5%   | 0%  | 5%     | 14%       | 81%   | 0%         | 52%       | 38%    | 5%    | 5%       |
| VagMiso<50mcg                 | 6%                      | 91%  | 4%   | 0%  | 6%     | 0%        | 94%   | 0%         | 17%       | 44%    | 31%   | 7%       |
| VagMiso>50mcg                 | 12%                     | 82%  | 6%   | 0%  | 9%     | 7%        | 84%   | 0%         | 25%       | 49%    | 21%   | 5%       |
| OMiso<50mcg                   | 0%                      | 67%  | 33%  | 0%  | 0%     | 0%        | 100%  | 0%         | 0%        | 33%    | 33%   | 33%      |
| OMiso>50mcg                   | 6%                      | 86%  | 8%   | 0%  | 10%    | 4%        | 84%   | 2%         | 16%       | 39%    | 20%   | 25%      |
| TitrOMiso                     | 0%                      | 100% | 0%   | 0%  | 0%     | 0%        | 100%  | 0%         | 11%       | 22%    | 67%   | 0%       |
| VagMisopessarySR              | 0%                      | 100% | 0%   | 0%  | 0%     | 0%        | 100%  | 0%         | 50%       | 0%     | 50%   | 0%       |

**Table 2b: Characteristics of trials containing each treatment: Caesarean Section**

|                               | Cervix |     |       |       | Gestation |               |               |       | Singleton/Multiple Pregnancy |           |       | Risk of bias |          |  |
|-------------------------------|--------|-----|-------|-------|-----------|---------------|---------------|-------|------------------------------|-----------|-------|--------------|----------|--|
|                               | NR     | Fav | Mixed | Unfav | NR        | All post-Term | All >37 weeks | Mixed | NR                           | Singleton | Mixed | Low (1)      | High (2) |  |
| Placebo                       | 20%    | 3%  | 17%   | 60%   | 3%        | 23%           | 60%           | 13%   | 40%                          | 53%       | 7%    | 43%          | 57%      |  |
| Notreatment                   | 14%    | 2%  | 18%   | 66%   | 13%       | 14%           | 46%           | 27%   | 38%                          | 63%       | 0%    | 82%          | 18%      |  |
| VagPGE <sub>2</sub> tablet    | 3%     | 10% | 23%   | 65%   | 13%       | 10%           | 68%           | 10%   | 29%                          | 68%       | 3%    | 39%          | 61%      |  |
| VagPGE <sub>2</sub> gel       | 4%     | 1%  | 18%   | 77%   | 8%        | 7%            | 55%           | 30%   | 26%                          | 66%       | 8%    | 71%          | 29%      |  |
| VagPGE <sub>2</sub> pessarySR | 0%     | 0%  | 24%   | 76%   | 6%        | 39%           | 27%           | 27%   | 18%                          | 79%       | 3%    | 55%          | 45%      |  |
| VagPGF <sub>2</sub> gel       | 20%    | 0%  | 40%   | 40%   | 0%        | 0%            | 60%           | 40%   | 40%                          | 60%       | 0%    | 80%          | 20%      |  |
| cxPGE <sub>2</sub>            | 3%     | 1%  | 9%    | 87%   | 15%       | 8%            | 48%           | 28%   | 31%                          | 68%       | 1%    | 53%          | 47%      |  |
| VagPGE <sub>2</sub> pessary   | 10%    | 0%  | 24%   | 67%   | 10%       | 14%           | 43%           | 33%   | 43%                          | 57%       | 0%    | 43%          | 57%      |  |
| VagMiso<50mcg                 | 9%     | 0%  | 15%   | 76%   | 7%        | 9%            | 57%           | 26%   | 7%                           | 89%       | 4%    | 61%          | 39%      |  |
| VagMiso>50mcg                 | 9%     | 1%  | 14%   | 75%   | 11%       | 6%            | 54%           | 29%   | 9%                           | 88%       | 2%    | 52%          | 48%      |  |
| OMiso<50mcg                   | 0%     | 0%  | 0%    | 100%  | 0%        | 33%           | 67%           | 0%    | 0%                           | 100%      | 0%    | 100%         | 0%       |  |
| OMiso>50mcg                   | 20%    | 0%  | 16%   | 65%   | 10%       | 6%            | 53%           | 31%   | 6%                           | 92%       | 2%    | 65%          | 35%      |  |
| TitrOMiso                     | 22%    | 0%  | 11%   | 67%   | 0%        | 11%           | 33%           | 56%   | 0%                           | 100%      | 0%    | 100%         | 0%       |  |
| VagMisopessarySR              | 0%     | 0%  | 0%    | 100%  | 0%        | 0%            | 0%            | 100%  | 0%                           | 100%      | 0%    | 50%          | 50%      |  |

**Table 3a: Characteristics of trials containing each treatment: Uterine hyperstimulation with fetal heart rate changes**

|                               | Previous caesarean section |          |       | Parity |            |       |            | Membranes |        |       |          |
|-------------------------------|----------------------------|----------|-------|--------|------------|-------|------------|-----------|--------|-------|----------|
|                               | NR                         | Excluded | Mixed | NR     | Nulli-only | Mixed | Multi-only | NR        | Intact | Mixed | Ruptured |
| Placebo                       | 29%                        | 71%      | 0%    | 29%    | 29%        | 43%   | 0%         | 71%       | 0%     | 0%    | 29%      |
| Notreatment                   | 0%                         | 100%     | 0%    | 0%     | 0%         | 50%   | 50%        | 0%        | 25%    | 0%    | 75%      |
| VagPGE <sub>2</sub> tablet    | 11%                        | 78%      | 11%   | 0%     | 33%        | 67%   | 0%         | 33%       | 44%    | 22%   | 0%       |
| VagPGE <sub>2</sub> gel       | 5%                         | 85%      | 10%   | 5%     | 5%         | 85%   | 5%         | 10%       | 35%    | 50%   | 5%       |
| VagPGE <sub>2</sub> pessarySR | 0%                         | 79%      | 21%   | 7%     | 14%        | 79%   | 0%         | 14%       | 50%    | 36%   | 0%       |
| cxPGE <sub>2</sub>            | 13%                        | 76%      | 11%   | 8%     | 11%        | 82%   | 0%         | 32%       | 50%    | 16%   | 3%       |
| VagPGE <sub>2</sub> pessary   | 40%                        | 40%      | 20%   | 0%     | 20%        | 80%   | 0%         | 80%       | 20%    | 0%    | 0%       |
| VagMiso<50mcg                 | 0%                         | 93%      | 7%    | 3%     | 0%         | 97%   | 0%         | 14%       | 38%    | 41%   | 7%       |
| VagMiso>50mcg                 | 0%                         | 90%      | 10%   | 0%     | 7%         | 93%   | 0%         | 7%        | 59%    | 34%   | 0%       |
| OMiso<50mcg                   | 0%                         | 50%      | 50%   | 0%     | 0%         | 100%  | 0%         | 0%        | 0%     | 50%   | 50%      |
| OMiso>50mcg                   | 0%                         | 96%      | 4%    | 0%     | 0%         | 96%   | 4%         | 4%        | 50%    | 21%   | 25%      |
| TitroMiso                     | 0%                         | 100%     | 0%    | 0%     | 0%         | 100%  | 0%         | 0%        | 29%    | 71%   | 0%       |
| VagMisopessarySR              | 0%                         | 100%     | 0%    | 0%     | 0%         | 100%  | 0%         | 50%       | 0%     | 50%   | 0%       |

**Table 3b: Characteristics of trials containing each treatment: Uterine hyperstimulation with fetal heart rate changes**

|                               | Cervix |     |       |       | Gestation |               |               |       | Singleton/Multiple Pregnancy |           |       | Risk of bias |          |
|-------------------------------|--------|-----|-------|-------|-----------|---------------|---------------|-------|------------------------------|-----------|-------|--------------|----------|
|                               | NR     | Fav | Mixed | Unfav | NR        | All post-Term | All >37 weeks | Mixed | NR                           | Singleton | Mixed | Low (1)      | High (2) |
| Placebo                       | 43%    | 0%  | 0%    | 57%   | 0%        | 29%           | 71%           | 0%    | 43%                          | 57%       | 0%    | 86%          | 14%      |
| Notreatment                   | 50%    | 0%  | 50%   | 0%    | 25%       | 0%            | 25%           | 50%   | 0%                           | 100%      | 0%    | 50%          | 50%      |
| VagPGE <sub>2</sub> tablet    | 0%     | 11% | 22%   | 67%   | 0%        | 22%           | 67%           | 11%   | 0%                           | 100%      | 0%    | 44%          | 56%      |
| VagPGE <sub>2</sub> gel       | 0%     | 5%  | 15%   | 80%   | 5%        | 10%           | 50%           | 35%   | 10%                          | 80%       | 10%   | 85%          | 15%      |
| VagPGE <sub>2</sub> pessarySR | 0%     | 0%  | 29%   | 71%   | 0%        | 7%            | 36%           | 57%   | 0%                           | 93%       | 7%    | 64%          | 36%      |
| cxPGE <sub>2</sub>            | 5%     | 0%  | 16%   | 79%   | 3%        | 11%           | 50%           | 37%   | 13%                          | 87%       | 0%    | 55%          | 45%      |
| VagPGE <sub>2</sub> pessary   | 0%     | 0%  | 0%    | 100%  | 20%       | 0%            | 40%           | 40%   | 20%                          | 80%       | 0%    | 60%          | 40%      |
| VagMiso<50mcg                 | 0%     | 0%  | 10%   | 90%   | 0%        | 3%            | 55%           | 41%   | 3%                           | 90%       | 7%    | 66%          | 34%      |
| VagMiso>50mcg                 | 0%     | 0%  | 14%   | 86%   | 0%        | 7%            | 62%           | 31%   | 0%                           | 97%       | 3%    | 62%          | 38%      |
| OMiso<50mcg                   | 0%     | 0%  | 0%    | 100%  | 0%        | 0%            | 100%          | 0%    | 0%                           | 100%      | 0%    | 100%         | 0%       |
| OMiso>50mcg                   | 13%    | 0%  | 21%   | 67%   | 0%        | 4%            | 58%           | 38%   | 13%                          | 88%       | 0%    | 79%          | 21%      |
| TitroMiso                     | 0%     | 0%  | 14%   | 86%   | 0%        | 14%           | 29%           | 57%   | 0%                           | 100%      | 0%    | 100%         | 0%       |
| VagMisopessarySR              | 0%     | 0%  | 0%    | 100%  | 0%        | 0%            | 0%            | 100%  | 0%                           | 100%      | 0%    | 50%          | 50%      |

**Abbreviations used in tables 1 to 3.**

VagPGE<sub>2</sub>tablet = Vaginal PGE<sub>2</sub> (tablet); VagPGE<sub>2</sub>gel= Vaginal PGE<sub>2</sub> (gel); VagPGE<sub>2</sub>pessarySR= Vaginal PGE<sub>2</sub> pessary (slow release); cxPGE<sub>2</sub>= Intracervical PGE<sub>2</sub>; VagPGE<sub>2</sub>pessary= Vaginal PGE<sub>2</sub> pessary (normal release); VagMiso<50mcg = Vaginal misoprostol (Dose less than 50 mcg); VagMiso>50mcg = Vaginal misoprostol (Dose 50 mcg or more); OMiso<50mcg= Oral misoprostol tablet (Dose > 50 mcg); OMiso>50mcg = Oral misoprostol tablet (dose 50mcg or more); TitroMiso= Titrated (low dose) oral misoprostol solution; VagMisopessarySR = Sustained release misoprostol vaginal pessary.

**Table 4, 5, 6. Odds ratios and 95% credible intervals for failure to achieve vaginal delivery within 24 hours, caesarean section rate, and uterine hyperstimulation for every treatment compared to every other.**

Results from network meta-analysis based on consistency assumption and pairwise meta-analyses (where possible) All are considered undesirable outcomes. An OR >1 favours placebo.i.e. fewer events occur on a placebo than active treatment. An OR<1 favours the active treatment, i.e. fewer undesirable events occurred on the active treatment. Empty cells indicate that direct evidence was not available for that comparison.

**Table 4. Vaginal delivery not achieved within 24 hours.**

| Control Treatment                   | Active treatment                                | Network meta-analysis |             | Pairwise meta-analysis |             |
|-------------------------------------|-------------------------------------------------|-----------------------|-------------|------------------------|-------------|
|                                     |                                                 | OR                    | 95%CrIs     | OR                     | 95%CrIs     |
| Placebo                             | No treatment                                    | 0.32                  | (0.09-1.14) |                        |             |
| Placebo                             | Vaginal PGE2 (tablet)                           | 0.08                  | (0.03-0.20) |                        |             |
| Placebo                             | Vaginal PGE2 (gel)                              | 0.08                  | (0.03-0.17) |                        |             |
| Placebo                             | Vaginal PGE2 pessary (slow release)             | 0.10                  | (0.04-0.24) |                        |             |
| Placebo                             | Intracervical PGE2                              | 0.12                  | (0.06-0.26) | 0.09                   | (0.03-0.24) |
| Placebo                             | Vaginal PGE2 pessary (normal release)           | 0.19                  | (0.07-0.52) | 0.46                   | (0.07-3.09) |
| Placebo                             | Vaginal misoprostol (Dose less than 50 mcg)     | 0.07                  | (0.03-0.16) |                        |             |
| Placebo                             | Vaginal misoprostol (Dose 50 mcg or more)       | 0.06                  | (0.02-0.12) |                        |             |
| Placebo                             | Oral misoprostol tablet (Dose > 50 mcg)         | 0.16                  | (0.05-0.48) |                        |             |
| Placebo                             | Oral misoprostol tablet (dose 50mcg or more)    | 0.08                  | (0.04-0.18) | 0.10                   | (0.03-0.31) |
| Placebo                             | Titrated (low dose) oral misoprostol solution   | 0.06                  | (0.03-0.15) |                        |             |
| Placebo                             | Sustained release misoprostol vaginal pessary   | 0.09                  | (0.03-0.35) |                        |             |
| No treatment                        | Vaginal PGE2 (tablet)                           | 0.25                  | (0.08-0.76) |                        |             |
| No treatment                        | Vaginal PGE2 (gel)                              | 0.23                  | (0.09-0.62) | 0.30                   | (0.08-1.14) |
| No treatment                        | Vaginal PGE2 pessary (slow release)             | 0.31                  | (0.10-0.89) |                        |             |
| No treatment                        | Intracervical PGE2                              | 0.38                  | (0.14-1.06) |                        |             |
| No treatment                        | Vaginal PGE2 pessary (normal release)           | 0.59                  | (0.17-2.08) |                        |             |
| No treatment                        | Vaginal misoprostol (Dose less than 50 mcg)     | 0.22                  | (0.08-0.61) |                        |             |
| No treatment                        | Vaginal misoprostol (Dose 50 mcg or more)       | 0.17                  | (0.06-0.47) |                        |             |
| No treatment                        | Oral misoprostol tablet (Dose less than 50 mcg) | 0.49                  | (0.14-1.72) |                        |             |
| No treatment                        | Oral misoprostol tablet (dose 50mcg or more)    | 0.26                  | (0.09-0.69) | 0.18                   | (0.04-0.80) |
| No treatment                        | Titrated (low dose) oral misoprostol solution   | 0.19                  | (0.07-0.55) |                        |             |
| No treatment                        | Sustained release misoprostol vaginal pessary   | 0.29                  | (0.07-1.24) |                        |             |
| Vaginal PGE2 (tablet)               | Vaginal PGE2 (gel)                              | 0.93                  | (0.52-1.67) | 1.06                   | (0.36-3.21) |
| Vaginal PGE2 (tablet)               | Vaginal PGE2 pessary (slow release)             | 1.23                  | (0.62-2.43) |                        |             |
| Vaginal PGE2 (tablet)               | Intracervical PGE2                              | 1.53                  | (0.85-2.74) | 1.29                   | (0.42-3.96) |
| Vaginal PGE2 (tablet)               | Vaginal PGE2 pessary (normal release)           | 2.33                  | (0.93-6.08) |                        |             |
| Vaginal PGE2 (tablet)               | Vaginal misoprostol (Dose less than 50 mcg)     | 0.90                  | (0.49-1.63) | 0.67                   | (0.23-1.93) |
| Vaginal PGE2 (tablet)               | Vaginal misoprostol (Dose 50 mcg or more)       | 0.68                  | (0.38-1.21) |                        |             |
| Vaginal PGE2 (tablet)               | Oral misoprostol tablet (Dose less than 50 mcg) | 1.96                  | (0.75-5.07) |                        |             |
| Vaginal PGE2 (tablet)               | Oral misoprostol tablet (dose 50mcg or more)    | 1.04                  | (0.58-1.86) | 1.09                   | (0.35-3.41) |
| Vaginal PGE2 (tablet)               | Titrated (low dose) oral misoprostol solution   | 0.77                  | (0.38-1.53) |                        |             |
| Vaginal PGE2 (tablet)               | Sustained release misoprostol vaginal pessary   | 1.16                  | (0.35-3.83) |                        |             |
| Vaginal PGE2 (gel)                  | Vaginal PGE2 pessary (slow release)             | 1.32                  | (0.82-2.12) | 1.16                   | (0.34-4.01) |
| Vaginal PGE2 (gel)                  | Intracervical PGE2                              | 1.64                  | (1.14-2.38) | 1.40                   | (0.71-2.77) |
| Vaginal PGE2 (gel)                  | Vaginal PGE2 pessary (normal release)           | 2.51                  | (1.12-5.79) |                        |             |
| Vaginal PGE2 (gel)                  | Vaginal misoprostol (Dose less than 50 mcg)     | 0.96                  | (0.67-1.36) | 1.26                   | (0.60-2.64) |
| Vaginal PGE2 (gel)                  | Vaginal misoprostol (Dose 50 mcg or more)       | 0.73                  | (0.53-1.01) | 0.61                   | (0.37-1.00) |
| Vaginal PGE2 (gel)                  | Oral misoprostol tablet (Dose less than 50 mcg) | 2.11                  | (0.95-4.65) | 1.28                   | (0.42-3.98) |
| Vaginal PGE2 (gel)                  | Oral misoprostol tablet (dose 50mcg or more)    | 1.11                  | (0.77-1.60) | 1.74                   | (0.81-3.80) |
| Vaginal PGE2 (gel)                  | Titrated (low dose) oral misoprostol solution   | 0.82                  | (0.53-1.28) | 1.11                   | (0.60-2.03) |
| Vaginal PGE2 (gel)                  | Sustained release misoprostol vaginal pessary   | 1.24                  | (0.42-3.69) |                        |             |
| Vaginal PGE2 pessary (slow release) | Intracervical PGE2                              | 1.24                  | (0.76-2.05) | 1.31                   | (0.36-4.79) |
| Vaginal PGE2 pessary (slow release) | Vaginal PGE2 pessary (normal release)           | 1.90                  | (0.80-4.67) |                        |             |
| Vaginal PGE2 pessary (slow release) | Vaginal misoprostol (Dose less than 50 mcg)     | 0.73                  | (0.45-1.16) | 0.80                   | (0.34-1.91) |
| Vaginal PGE2 pessary (slow release) | Vaginal misoprostol (Dose 50 mcg or more)       | 0.55                  | (0.36-0.86) | 0.54                   | (0.30-1.00) |
| Vaginal PGE2 pessary (slow release) | Oral misoprostol tablet (Dose less than 50 mcg) | 1.59                  | (0.66-3.88) |                        |             |
| Vaginal PGE2 pessary (slow release) | Oral misoprostol tablet (dose 50mcg or more)    | 0.84                  | (0.51-1.39) |                        |             |
| Vaginal PGE2 pessary (slow release) | Titrated (low dose) oral misoprostol solution   | 0.62                  | (0.36-1.08) | 0.52                   | (0.16-1.69) |
| Vaginal PGE2 pessary (slow release) | Sustained release misoprostol vaginal pessary   | 0.94                  | (0.36-2.50) | 0.94                   | (0.34-2.61) |
| Intracervical PGE2                  | Vaginal PGE2 pessary (normal release)           | 1.53                  | (0.74-3.23) | 1.13                   | (0.48-2.65) |
| Intracervical PGE3                  | Vaginal misoprostol (Dose less than 50 mcg)     | 0.59                  | (0.40-0.84) | 0.60                   | (0.30-1.16) |
| Intracervical PGE4                  | Vaginal misoprostol (Dose 50 mcg or more)       | 0.45                  | (0.31-0.63) | 0.39                   | (0.21-0.70) |
| Intracervical PGE5                  | Oral misoprostol tablet (Dose less than 50 mcg) | 1.28                  | (0.55-2.96) |                        |             |
| Intracervical PGE6                  | Oral misoprostol tablet (dose 50mcg or more)    | 0.68                  | (0.47-0.97) | 0.61                   | (0.30-1.23) |

|                                                 |                                                 |      |             |      |              |
|-------------------------------------------------|-------------------------------------------------|------|-------------|------|--------------|
| Intracervical PGE7                              | Titrated (low dose) oral misoprostol solution   | 0.50 | (0.30-0.83) |      |              |
| Intracervical PGE8                              | Sustained release misoprostol vaginal pessary   | 0.76 | (0.25-2.25) |      |              |
| Vaginal PGE2 pessary (normal release)           | Vaginal misoprostol (Dose less than 50 mcg)     | 0.38 | (0.17-0.85) |      |              |
| Vaginal PGE2 pessary (normal release)           | Vaginal misoprostol (Dose 50 mcg or more)       | 0.29 | (0.13-0.65) |      |              |
| Vaginal PGE2 pessary (normal release)           | Oral misoprostol tablet (Dose less than 50 mcg) | 0.84 | (0.27-2.52) |      |              |
| Vaginal PGE2 pessary (normal release)           | Oral misoprostol tablet (dose 50mcg or more)    | 0.44 | (0.19-0.99) |      |              |
| Vaginal PGE2 pessary (normal release)           | Titrated (low dose) oral misoprostol solution   | 0.33 | (0.13-0.79) |      |              |
| Vaginal PGE2 pessary (normal release)           | Sustained release misoprostol vaginal pessary   | 0.50 | (0.13-1.82) |      |              |
| Vaginal misoprostol (Dose less than 50 mcg)     | Vaginal misoprostol (Dose 50 mcg or more)       | 0.76 | (0.55-1.06) | 1.25 | (0.68-2.31)  |
| Vaginal misoprostol (Dose less than 50 mcg)     | Oral misoprostol tablet (Dose less than 50 mcg) | 2.19 | (0.99-4.83) | 3.58 | (1.16-11.16) |
| Vaginal misoprostol (Dose less than 50 mcg)     | Oral misoprostol tablet (dose 50mcg or more)    | 1.16 | (0.82-1.63) | 1.18 | (0.71-1.99)  |
| Vaginal misoprostol (Dose less than 50 mcg)     | Titrated (low dose) oral misoprostol solution   | 0.86 | (0.54-1.35) | 0.36 | (0.15-0.81)  |
| Vaginal misoprostol (Dose less than 50 mcg)     | Sustained release misoprostol vaginal pessary   | 1.29 | (0.44-3.83) |      |              |
| Vaginal misoprostol (Dose 50 mcg or more)       | Oral misoprostol tablet (Dose less than 50 mcg) | 2.88 | (1.26-6.55) |      |              |
| Vaginal misoprostol (Dose 50 mcg or more)       | Oral misoprostol tablet (dose 50mcg or more)    | 1.52 | (1.09-2.13) | 1.45 | (0.79-2.67)  |
| Vaginal misoprostol (Dose 50 mcg or more)       | Titrated (low dose) oral misoprostol solution   | 1.13 | (0.69-1.82) |      |              |
| Vaginal misoprostol (Dose 50 mcg or more)       | Sustained release misoprostol vaginal pessary   | 1.70 | (0.59-4.95) |      |              |
| Oral misoprostol tablet (Dose less than 50 mcg) | Oral misoprostol tablet (dose 50mcg or more)    | 0.53 | (0.23-1.21) |      |              |
| Oral misoprostol tablet (Dose less than 50 mcg) | Titrated (low dose) oral misoprostol solution   | 0.39 | (0.16-0.93) |      |              |
| Oral misoprostol tablet (Dose less than 50 mcg) | Sustained release misoprostol vaginal pessary   | 0.59 | (0.16-2.22) |      |              |
| Oral misoprostol tablet (dose 50mcg or more)    | Titrated (low dose) oral misoprostol solution   | 0.74 | (0.45-1.21) | 2.30 | (0.55-9.79)  |
| Oral misoprostol tablet (dose 50mcg or more)    | Sustained release misoprostol vaginal pessary   | 1.12 | (0.38-3.37) |      |              |
| Titrated (low dose) oral misoprostol solution   | Sustained release misoprostol vaginal pessary   | 1.51 | (0.49-4.66) |      |              |

**Table 5. Caesarean section.**

Results from network meta-analysis based on consistency assumption and pairwise meta-analyses (where possible). An OR >1 favours placebo.i.e. fewer events occur on a placebo than active treatment. An OR<1 favours the active treatment, i.e. fewer undesirable events occurred on the active treatment. Empty cells denote no direct evidence available for that comparison.

| Control Treatment                   | Active treatment                                | Network meta-analysis |             | Pairwise meta-analysis |             |
|-------------------------------------|-------------------------------------------------|-----------------------|-------------|------------------------|-------------|
|                                     |                                                 | OR                    | 95%CrIs     | OR                     | 95%CrIs     |
| Placebo                             | No treatment                                    | 1.00                  | (0.74-1.32) | -                      | -           |
| Placebo                             | Vaginal PGE2 (tablet)                           | 0.93                  | (0.7-1.23)  | 0.00                   | (0.00-0.72) |
| Placebo                             | Vaginal PGE2 (gel)                              | 0.80                  | (0.68-0.95) | 0.90                   | (0.68-1.20) |
| Placebo                             | Vaginal PGE2 pessary (slow release)             | 0.89                  | (0.67-1.15) | 0.57                   | (0.25-1.23) |
| Placebo                             | PGF2 gel                                        | 0.98                  | (0.57-1.59) | 0.65                   | (0.24-1.80) |
| Placebo                             | Intracervical PGE2                              | 0.86                  | (0.72-1.02) | 0.86                   | (0.67-1.11) |
| Placebo                             | Vaginal PGE2 pessary (normal release)           | 0.98                  | (0.70-1.35) | 0.82                   | (0.43-1.57) |
| Placebo                             | Vaginal misoprostol (Dose less than 50 mcg)     | 0.76                  | (0.62-0.92) | 1.10                   | (0.57-2.07) |
| Placebo                             | Vaginal misoprostol (Dose 50 mcg or more)       | 0.74                  | (0.60-0.89) | 0.90                   | (0.14-3.69) |
| Placebo                             | Oral misoprostol tablet (Dose less than 50 mcg) | 1.17                  | (0.69-1.85) | -                      | -           |
| Placebo                             | Oral misoprostol tablet (dose 50mcg or more)    | 0.72                  | (0.59-0.89) | 0.59                   | (0.35-0.95) |
| Placebo                             | Titrated (low dose) oral misoprostol solution   | 0.65                  | (0.49-0.83) | -                      | -           |
| Placebo                             | Sustained release misoprostol vaginal pessary   | 0.97                  | (0.61-1.48) | -                      | -           |
| No treatment                        | Vaginal PGE2 (tablet)                           | 0.95                  | (0.67-1.33) | -                      | -           |
| No treatment                        | Vaginal PGE2 (gel)                              | 0.82                  | (0.63-1.05) | 1.06                   | (0.48-2.35) |
| No treatment                        | Vaginal PGE2 pessary (slow release)             | 0.90                  | (0.64-1.23) | 3.68                   | (0.40-97.2) |
| No treatment                        | PGF2 gel                                        | 1.00                  | (0.56-1.67) | -                      | -           |
| No treatment                        | Intracervical PGE2                              | 0.87                  | (0.68-1.11) | 0.88                   | (0.61-1.29) |
| No treatment                        | Vaginal PGE2 pessary (normal release)           | 1.00                  | (0.68-1.40) | 0.95                   | (0.41-2.20) |
| No treatment                        | Vaginal misoprostol (Dose less than 50 mcg)     | 0.78                  | (0.59-1.00) | 0.51                   | (0.25-1.03) |
| No treatment                        | Vaginal misoprostol (Dose 50 mcg or more)       | 0.75                  | (0.57-0.97) | 0.72                   | (0.35-1.40) |
| No treatment                        | Oral misoprostol tablet (Dose less than 50 mcg) | 1.19                  | (0.68-1.94) | -                      | -           |
| No treatment                        | Oral misoprostol tablet (dose 50mcg or more)    | 0.74                  | (0.55-0.96) | 1.03                   | (0.24-4.52) |
| No treatment                        | Titrated (low dose) oral misoprostol solution   | 0.66                  | (0.47-0.90) | -                      | -           |
| No treatment                        | Sustained release misoprostol vaginal pessary   | 0.99                  | (0.60-1.55) | -                      | -           |
| Vaginal PGE2 (tablet)               | Vaginal PGE2 (gel)                              | 0.88                  | (0.68-1.12) | 0.83                   | (0.55-1.23) |
| Vaginal PGE2 (tablet)               | Vaginal PGE2 pessary (slow release)             | 0.97                  | (0.68-1.33) | -                      | -           |
| Vaginal PGE2 (tablet)               | PGF2 gel                                        | 1.07                  | (0.58-1.80) | -                      | -           |
| Vaginal PGE2 (tablet)               | Intracervical PGE2                              | 0.94                  | (0.71-1.21) | 0.74                   | (0.40-1.37) |
| Vaginal PGE2 (tablet)               | Vaginal PGE2 pessary (normal release)           | 1.08                  | (0.71-1.56) | -                      | -           |
| Vaginal PGE2 (tablet)               | Vaginal misoprostol (Dose less than 50 mcg)     | 0.83                  | (0.63-1.08) | -                      | -           |
| Vaginal PGE2 (tablet)               | Vaginal misoprostol (Dose 50 mcg or more)       | 0.80                  | (0.62-1.02) | -                      | -           |
| Vaginal PGE2 (tablet)               | Oral misoprostol tablet (Dose less than 50 mcg) | 1.27                  | (0.73-2.07) | -                      | -           |
| Vaginal PGE2 (tablet)               | Oral misoprostol tablet (dose 50mcg or more)    | 0.79                  | (0.59-1.03) | 0.90                   | (0.44-1.84) |
| Vaginal PGE2 (tablet)               | Titrated (low dose) oral misoprostol solution   | 0.71                  | (0.51-0.96) | -                      | -           |
| Vaginal PGE2 (tablet)               | Sustained release misoprostol vaginal pessary   | 1.06                  | (0.63-1.66) | -                      | -           |
| Vaginal PGE2 (gel)                  | Vaginal PGE2 pessary (slow release)             | 1.10                  | (0.86-1.40) | 1.46                   | (0.72-3.05) |
| Vaginal PGE2 (gel)                  | PGF2 gel                                        | 1.22                  | (0.72-1.96) | 0.99                   | (0.32-3.12) |
| Vaginal PGE2 (gel)                  | Intracervical PGE2                              | 1.07                  | (0.91-1.24) | 1.27                   | (0.92-1.76) |
| Vaginal PGE2 (gel)                  | Vaginal PGE2 pessary (normal release)           | 1.23                  | (0.88-1.66) | 1.52                   | (0.57-4.17) |
| Vaginal PGE2 (gel)                  | Vaginal misoprostol (Dose less than 50 mcg)     | 0.95                  | (0.81-1.10) | 0.91                   | (0.70-1.18) |
| Vaginal PGE2 (gel)                  | Vaginal misoprostol (Dose 50 mcg or more)       | 0.92                  | (0.79-1.05) | 0.84                   | (0.65-1.06) |
| Vaginal PGE2 (gel)                  | Oral misoprostol tablet (Dose less than 50 mcg) | 1.45                  | (0.89-2.25) | 0.94                   | (0.42-2.07) |
| Vaginal PGE2 (gel)                  | Oral misoprostol tablet (dose 50mcg or more)    | 0.90                  | (0.76-1.06) | 1.09                   | (0.77-1.58) |
| Vaginal PGE2 (gel)                  | Titrated (low dose) oral misoprostol solution   | 0.81                  | (0.65-0.99) | 0.82                   | (0.61-1.11) |
| Vaginal PGE2 (gel)                  | Sustained release misoprostol vaginal pessary   | 1.21                  | (0.77-1.81) | -                      | -           |
| Vaginal PGE2 pessary (slow release) | PGF2 gel                                        | 1.13                  | (0.63-1.87) | -                      | -           |
| Vaginal PGE2 pessary (slow release) | Intracervical PGE2                              | 0.98                  | (0.75-1.26) | 0.89                   | (0.49-1.56) |
| Vaginal PGE2 pessary (slow release) | Vaginal PGE2 pessary (normal release)           | 1.13                  | (0.76-1.61) | -                      | -           |

|                                                 |                                                 |      |             |      |             |
|-------------------------------------------------|-------------------------------------------------|------|-------------|------|-------------|
| Vaginal PGE2 pessary (slow release)             | Vaginal misoprostol (Dose less than 50 mcg)     | 0.87 | (0.67-1.12) | 1.12 | (0.62-2.02) |
| Vaginal PGE2 pessary (slow release)             | Vaginal misoprostol (Dose 50 mcg or more)       | 0.84 | (0.66-1.06) | 0.89 | (0.63-1.28) |
| Vaginal PGE2 pessary (slow release)             | Oral misoprostol tablet (Dose less than 50 mcg) | 1.34 | (0.77-2.16) | -    | -           |
| Vaginal PGE2 pessary (slow release)             | Oral misoprostol tablet (dose 50mcg or more)    | 0.83 | (0.63-1.07) | -    | -           |
| Vaginal PGE2 pessary (slow release)             | Titrated (low dose) oral misoprostol solution   | 0.74 | (0.54-0.99) | 0.43 | (0.16-1.08) |
| Vaginal PGE2 pessary (slow release)             | Sustained release misoprostol vaginal pessary   | 1.10 | (0.77-1.53) | 1.08 | (0.70-1.66) |
| PGF2 gel                                        | Intracervical PGE2                              | 0.93 | (0.54-1.49) | -    | -           |
| PGF2 gel                                        | Vaginal PGE2 pessary (normal release)           | 1.07 | (0.58-1.78) | 0.93 | (0.37-2.28) |
| PGF2 gel                                        | Vaginal misoprostol (Dose less than 50 mcg)     | 0.83 | (0.48-1.34) | -    | -           |
| PGF2 gel                                        | Vaginal misoprostol (Dose 50 mcg or more)       | 0.80 | (0.47-1.28) | 0.41 | (0.16-1.02) |
| PGF2 gel                                        | Oral misoprostol tablet (Dose less than 50 mcg) | 1.27 | (0.60-2.35) | -    | -           |
| PGF2 gel                                        | Oral misoprostol tablet (dose 50mcg or more)    | 0.79 | (0.45-1.29) | -    | -           |
| PGF2 gel                                        | Titrated (low dose) oral misoprostol solution   | 0.70 | (0.40-1.14) | 0.50 | (0.21-1.23) |
| PGF2 gel                                        | Sustained release misoprostol vaginal pessary   | 1.06 | (0.52-1.91) | -    | -           |
| Intracervical PGE2                              | Vaginal PGE2 pessary (normal release)           | 1.15 | (0.83-1.54) | 1.04 | (0.54-2.03) |
| Intracervical PGE2                              | Vaginal misoprostol (Dose less than 50 mcg)     | 0.89 | (0.75-1.05) | 0.86 | (0.60-1.24) |
| Intracervical PGE2                              | Vaginal misoprostol (Dose 50 mcg or more)       | 0.86 | (0.73-1.01) | 1.02 | (0.74-1.42) |
| Intracervical PGE2                              | Oral misoprostol tablet (Dose less than 50 mcg) | 1.36 | (0.82-2.13) | -    | -           |
| Intracervical PGE2                              | Oral misoprostol tablet (dose 50mcg or more)    | 0.85 | (0.70-1.01) | 0.83 | (0.54-1.30) |
| Intracervical PGE2                              | Titrated (low dose) oral misoprostol solution   | 0.76 | (0.59-0.96) | -    | -           |
| Intracervical PGE2                              | Sustained release misoprostol vaginal pessary   | 1.14 | (0.72-1.71) | -    | -           |
| Vaginal PGE2 pessary (normal release)           | Vaginal misoprostol (Dose less than 50 mcg)     | 0.79 | (0.56-1.09) | -    | -           |
| Vaginal PGE2 pessary (normal release)           | Vaginal misoprostol (Dose 50 mcg or more)       | 0.76 | (0.55-1.04) | 0.77 | (0.31-1.92) |
| Vaginal PGE2 pessary (normal release)           | Oral misoprostol tablet (Dose less than 50 mcg) | 1.21 | (0.68-2.01) | -    | -           |
| Vaginal PGE2 pessary (normal release)           | Oral misoprostol tablet (dose 50mcg or more)    | 0.75 | (0.53-1.05) | -    | -           |
| Vaginal PGE2 pessary (normal release)           | Titrated (low dose) oral misoprostol solution   | 0.67 | (0.46-0.95) | -    | -           |
| Vaginal PGE2 pessary (normal release)           | Sustained release misoprostol vaginal pessary   | 1.01 | (0.59-1.63) | -    | -           |
| Vaginal misoprostol (Dose less than 50 mcg)     | Vaginal misoprostol (Dose 50 mcg or more)       | 0.97 | (0.82-1.13) | 1.21 | (0.86-1.70) |
| Vaginal misoprostol (Dose less than 50 mcg)     | Oral misoprostol tablet (Dose less than 50 mcg) | 1.54 | (0.93-2.38) | 2.30 | (1.12-4.74) |
| Vaginal misoprostol (Dose less than 50 mcg)     | Oral misoprostol tablet (dose 50mcg or more)    | 0.95 | (0.80-1.12) | 0.76 | (0.56-1.02) |
| Vaginal misoprostol (Dose less than 50 mcg)     | Titrated (low dose) oral misoprostol solution   | 0.85 | (0.67-1.07) | 0.71 | (0.41-1.23) |
| Vaginal misoprostol (Dose less than 50 mcg)     | Sustained release misoprostol vaginal pessary   | 1.28 | (0.91-1.92) | -    | -           |
| Vaginal misoprostol (Dose 50 mcg or more)       | Oral misoprostol tablet (Dose less than 50 mcg) | 1.59 | (0.96-2.49) | -    | -           |
| Vaginal misoprostol (Dose 50 mcg or more)       | Oral misoprostol tablet (dose 50mcg or more)    | 0.99 | (0.84-1.15) | 1.07 | (0.82-1.39) |
| Vaginal misoprostol (Dose 50 mcg or more)       | Titrated (low dose) oral misoprostol solution   | 0.88 | (0.69-1.11) | 1.72 | (0.38-8.94) |
| Vaginal misoprostol (Dose 50 mcg or more)       | Sustained release misoprostol vaginal pessary   | 1.33 | (0.85-1.97) | -    | -           |
| Oral misoprostol tablet (Dose less than 50 mcg) | Oral misoprostol tablet (dose 50mcg or more)    | 0.66 | (0.39-1.02) | 0.95 | (0.23-4.01) |
| Oral misoprostol tablet (Dose less than 50 mcg) | Titrated (low dose) oral misoprostol solution   | 0.59 | (0.34-0.93) | -    | -           |
| Oral misoprostol tablet (Dose less than 50 mcg) | Sustained release misoprostol vaginal pessary   | 0.88 | (0.45-1.55) | -    | -           |
| Oral misoprostol tablet (dose 50mcg or more)    | Titrated (low dose) oral misoprostol solution   | 0.90 | (0.70-1.14) | 1.67 | (0.58-4.81) |
| Oral misoprostol tablet (dose 50mcg or more)    | Sustained release misoprostol vaginal pessary   | 1.35 | (0.85-2.04) | -    | -           |
| Titrated (low dose) oral misoprostol            | Sustained release misoprostol vaginal pessary   | 1.52 | (0.93-2.35) | -    | -           |



|          |  |  |  |  |
|----------|--|--|--|--|
| solution |  |  |  |  |
|----------|--|--|--|--|

**Table 6. Hyperstimulation with fetal heart changes.**

Results from network meta-analysis based on consistency assumption and pairwise meta-analyses (where possible) An OR >1 favours placebo,i.e. fewer events occur on a placebo than active treatment. An OR<1 favours the active treatment, i.e. fewer undesirable events occurred on the active treatment. Empty cells denote no direct evidence available for that comparison. **Note that the results reported here from the NMA are for information only due to the presence of unexplained inconsistency for this outcome.**

| Control Treatment                   | Active treatment                                | Network meta-analysis |              | Pairwise meta-analysis |               |
|-------------------------------------|-------------------------------------------------|-----------------------|--------------|------------------------|---------------|
|                                     |                                                 | OR                    | 95%CrIs      | OR                     | 95%CrIs       |
| Placebo                             | No treatment                                    | 3.41                  | (0.80-15.13) | -                      | -             |
| Placebo                             | Vaginal PGE2 (tablet)                           | 5.22                  | (1.76-17.09) | 0.00                   | (0.00-0.75)   |
| Placebo                             | Vaginal PGE2 (gel)                              | 7.70                  | (2.88-22.48) | Not estimable          | Not estimable |
| Placebo                             | Vaginal PGE2 pessary (slow release)             | 6.91                  | (2.55-20.72) | Not estimable          | Not estimable |
| Placebo                             | Intracervical PGE2                              | 4.16                  | (1.71-10.63) | 1.92                   | (0.60-6.88)   |
| Placebo                             | Vaginal PGE2 pessary (normal release)           | 5.64                  | (0.86-37.88) | -                      | -             |
| Placebo                             | Vaginal misoprostol (Dose less than 50 mcg)     | 8.04                  | (3.17-21.90) | 2.77                   | (0.32-32.06)  |
| Placebo                             | Vaginal misoprostol (Dose 50 mcg or more)       | 13.15                 | (5.37-35.58) | Not estimable          | Not estimable |
| Placebo                             | Oral misoprostol tablet (Dose > 50 mcg)         | 3.06                  | (0.65-15.22) | -                      | -             |
| Placebo                             | Oral misoprostol tablet (dose 50mcg or more)    | 8.23                  | (3.29-23.06) | Not estimable          | Not estimable |
| Placebo                             | Titrated (low dose) oral misoprostol solution   | 5.71                  | (1.75-19.67) | -                      | -             |
| Placebo                             | Sustained release misoprostol vaginal pessary   | 11.82                 | (2.69-58.82) | -                      | -             |
| No treatment                        | Vaginal PGE2 (tablet)                           | 1.53                  | (0.38-6.25)  | -                      | -             |
| No treatment                        | Vaginal PGE2 (gel)                              | 2.25                  | (0.63-8.30)  | Not estimable          | Not estimable |
| No treatment                        | Vaginal PGE2 pessary (slow release)             | 2.04                  | (0.54-7.85)  | -                      | -             |
| No treatment                        | Intracervical PGE2                              | 1.22                  | (0.37-3.96)  | 1.30                   | (0.29-5.88)   |
| No treatment                        | Vaginal PGE2 pessary (normal release)           | 1.65                  | (0.21-12.71) | -                      | -             |
| No treatment                        | Vaginal misoprostol (Dose less than 50 mcg)     | 2.35                  | (0.67-8.33)  | -                      | -             |
| No treatment                        | Vaginal misoprostol (Dose 50 mcg or more)       | 3.85                  | (1.16-13.09) | 1.72                   | (0.19-13.90)  |
| No treatment                        | Oral misoprostol tablet (Dose less than 50 mcg) | 0.89                  | (0.15-5.32)  | -                      | -             |
| No treatment                        | Oral misoprostol tablet (dose 50mcg or more)    | 2.42                  | (0.68-8.73)  | -                      | -             |
| No treatment                        | Titrated (low dose) oral misoprostol solution   | 1.67                  | (0.40-6.98)  | -                      | -             |
| No treatment                        | Sustained release misoprostol vaginal pessary   | 3.47                  | (0.62-20.38) | -                      | -             |
| Vaginal PGE2 (tablet)               | Vaginal PGE2 (gel)                              | 1.47                  | (0.62-3.42)  | 1.58                   | (0.34-7.69)   |
| Vaginal PGE2 (tablet)               | Vaginal PGE2 pessary (slow release)             | 1.33                  | (0.52-3.41)  | 1.39                   | (0.16-13.30)  |
| Vaginal PGE2 (tablet)               | Intracervical PGE2                              | 0.80                  | (0.33-1.84)  | -                      | -             |
| Vaginal PGE2 (tablet)               | Vaginal PGE2 pessary (normal release)           | 1.08                  | (0.18-6.40)  | -                      | -             |
| Vaginal PGE2 (tablet)               | Vaginal misoprostol (Dose less than 50 mcg)     | 1.54                  | (0.64-3.60)  | -                      | -             |
| Vaginal PGE2 (tablet)               | Vaginal misoprostol (Dose 50 mcg or more)       | 2.51                  | (1.19-5.28)  | 1.73                   | (0.68-4.36)   |
| Vaginal PGE2 (tablet)               | Oral misoprostol tablet (Dose less than 50 mcg) | 0.58                  | (0.13-2.61)  | -                      | -             |
| Vaginal PGE2 (tablet)               | Oral misoprostol tablet (dose 50mcg or more)    | 1.58                  | (0.66-3.75)  | -                      | -             |
| Vaginal PGE2 (tablet)               | Titrated (low dose) oral misoprostol solution   | 1.10                  | (0.36-3.19)  | -                      | -             |
| Vaginal PGE2 (tablet)               | Sustained release misoprostol vaginal pessary   | 2.28                  | (0.53-10.09) | -                      | -             |
| Vaginal PGE2 (gel)                  | Vaginal PGE2 pessary (slow release)             | 0.90                  | (0.41-2.04)  | -                      | -             |
| Vaginal PGE2 (gel)                  | Intracervical PGE2                              | 0.54                  | (0.28-1.02)  | 0.57                   | (0.09-3.05)   |
| Vaginal PGE2 (gel)                  | Vaginal PGE2 pessary (normal release)           | 0.74                  | (0.13-3.83)  | Not estimable          | Not estimable |
| Vaginal PGE2 (gel)                  | Vaginal misoprostol (Dose less than 50 mcg)     | 1.05                  | (0.57-1.88)  | 1.21                   | (0.41-3.28)   |
| Vaginal PGE2 (gel)                  | Vaginal misoprostol (Dose 50 mcg or more)       | 1.71                  | (0.98-2.98)  | 1.10                   | (0.47-2.57)   |
| Vaginal PGE2 (gel)                  | Oral misoprostol tablet (Dose less than 50 mcg) | 0.40                  | (0.11-1.44)  | 0.59                   | (0.10-3.31)   |
| Vaginal PGE2 (gel)                  | Oral misoprostol tablet (dose 50mcg or more)    | 1.08                  | (0.55-2.06)  | 1.38                   | (0.22-9.54)   |
| Vaginal PGE2 (gel)                  | Titrated (low dose) oral misoprostol solution   | 0.75                  | (0.32-1.68)  | 1.20                   | (0.42-3.29)   |
| Vaginal PGE2 (gel)                  | Sustained release misoprostol vaginal pessary   | 1.55                  | (0.39-6.20)  | -                      | -             |
| Vaginal PGE2 pessary (slow release) | Intracervical PGE2                              | 0.60                  | (0.28-1.25)  | 0.82                   | (0.22-3.03)   |
| Vaginal PGE2 pessary (slow release) | Vaginal PGE2 pessary (normal release)           | 0.81                  | (0.13-4.63)  | -                      | -             |
| Vaginal PGE2 pessary (slow release) | Vaginal misoprostol (Dose less than 50 mcg)     | 1.16                  | (0.54-2.45)  | 0.11                   | (0.00-1.20)   |
| Vaginal PGE2 pessary (slow release) | Vaginal misoprostol (Dose 50 mcg or more)       | 1.89                  | (0.94-3.77)  | 2.73                   | (1.08-7.40)   |
| Vaginal PGE2 pessary (slow release) | Oral misoprostol tablet (Dose less than 50 mcg) | 0.44                  | (0.10-1.87)  | -                      | -             |
| Vaginal PGE2 pessary (slow release) | Oral misoprostol tablet (dose 50mcg or more)    | 1.19                  | (0.53-2.64)  | -                      | -             |
| Vaginal PGE2 pessary (slow release) | Titrated (low dose) oral misoprostol solution   | 0.82                  | (0.30-2.18)  | 1.49                   | (0.22-10.45)  |
| Vaginal PGE2 pessary (slow release) | Sustained release misoprostol vaginal pessary   | 1.71                  | (0.56-5.32)  | 1.71                   | (0.56-5.23)   |

|                                                 |                                                 |      |              |               |               |
|-------------------------------------------------|-------------------------------------------------|------|--------------|---------------|---------------|
| Intracervical PGE2                              | Vaginal PGE2 pessary (normal release)           | 1.36 | (0.24-7.37)  | -             | -             |
| Intracervical PGE2                              | Vaginal misoprostol (Dose less than 50 mcg)     | 1.94 | (1.12-3.38)  | 1.47          | (0.66-3.34)   |
| Intracervical PGE2                              | Vaginal misoprostol (Dose 50 mcg or more)       | 3.16 | (1.92-5.35)  | 3.57          | (1.66-8.06)   |
| Intracervical PGE2                              | Oral misoprostol tablet (Dose less than 50 mcg) | 0.73 | (0.19-2.92)  | -             | -             |
| Intracervical PGE2                              | Oral misoprostol tablet (dose 50mcg or more)    | 1.99 | (1.10-3.64)  | 2.10          | (0.72-6.66)   |
| Intracervical PGE2                              | Titrated (low dose) oral misoprostol solution   | 1.38 | (0.55-3.45)  | -             | -             |
| Intracervical PGE2                              | Sustained release misoprostol vaginal pessary   | 2.87 | (0.76-11.25) | -             | -             |
| Vaginal PGE2 pessary (normal release)           | Vaginal misoprostol (Dose less than 50 mcg)     | 1.43 | (0.27-7.82)  | 0.20          | (0.00-3.83)   |
| Vaginal PGE2 pessary (normal release)           | Vaginal misoprostol (Dose 50 mcg or more)       | 2.33 | (0.46-12.41) | Not estimable | Not estimable |
| Vaginal PGE2 pessary (normal release)           | Oral misoprostol tablet (Dose less than 50 mcg) | 0.54 | (0.07-4.38)  | -             | -             |
| Vaginal PGE2 pessary (normal release)           | Oral misoprostol tablet (dose 50mcg or more)    | 1.47 | (0.27-8.21)  | -             | -             |
| Vaginal PGE2 pessary (normal release)           | Titrated (low dose) oral misoprostol solution   | 1.02 | (0.16-6.37)  | -             | -             |
| Vaginal PGE2 pessary (normal release)           | Sustained release misoprostol vaginal pessary   | 2.12 | (0.27-17.55) | -             | -             |
| Vaginal misoprostol (Dose less than 50 mcg)     | Vaginal misoprostol (Dose 50 mcg or more)       | 1.63 | (0.99-2.76)  | 2.10          | (0.78-6.17)   |
| Vaginal misoprostol (Dose less than 50 mcg)     | Oral misoprostol tablet (Dose less than 50 mcg) | 0.38 | (0.10-1.40)  | 0.24          | (0.04-1.50)   |
| Vaginal misoprostol (Dose less than 50 mcg)     | Oral misoprostol tablet (dose 50mcg or more)    | 1.03 | (0.58-1.82)  | 0.48          | (0.18-1.23)   |
| Vaginal misoprostol (Dose less than 50 mcg)     | Titrated (low dose) oral misoprostol solution   | 0.71 | (0.30-1.64)  | 0.13          | (0.01-0.80)   |
| Vaginal misoprostol (Dose less than 50 mcg)     | Sustained release misoprostol vaginal pessary   | 1.48 | (0.39-5.89)  | -             | -             |
| Vaginal misoprostol (Dose 50 mcg or more)       | Oral misoprostol tablet (Dose less than 50 mcg) | 0.23 | (0.06-0.88)  | -             | -             |
| Vaginal misoprostol (Dose 50 mcg or more)       | Oral misoprostol tablet (dose 50mcg or more)    | 0.63 | (0.38-1.04)  | 0.73          | (0.37-1.39)   |
| Vaginal misoprostol (Dose 50 mcg or more)       | Titrated (low dose) oral misoprostol solution   | 0.44 | (0.17-1.03)  | -             | -             |
| Vaginal misoprostol (Dose 50 mcg or more)       | Sustained release misoprostol vaginal pessary   | 0.91 | (0.25-3.39)  | -             | -             |
| Oral misoprostol tablet (Dose less than 50 mcg) | Oral misoprostol tablet (dose 50mcg or more)    | 2.71 | (0.68-10.78) | -             | -             |
| Oral misoprostol tablet (Dose less than 50 mcg) | Titrated (low dose) oral misoprostol solution   | 1.89 | (0.42-8.33)  | -             | -             |
| Oral misoprostol tablet (Dose less than 50 mcg) | Sustained release misoprostol vaginal pessary   | 3.89 | (0.63-24.94) | -             | -             |
| Oral misoprostol tablet (dose 50mcg or more)    | Titrated (low dose) oral misoprostol solution   | 0.69 | (0.26-1.75)  | -             | -             |
| Oral misoprostol tablet (dose 50mcg or more)    | Sustained release misoprostol vaginal pessary   | 1.44 | (0.36-5.82)  | -             | -             |
| Titrated (low dose) oral misoprostol solution   | Sustained release misoprostol vaginal pessary   | 2.08 | (0.48-9.53)  | -             | -             |

**Table 7. Model fit and selection statistics by outcomes: Fixed effect and random effects models. For random effects models we also compared the fit of consistency and inconsistency models.**

**Vaginal delivery not achieved within 24 hours:** Convergence was assessed using two chains and was achieved by 35,000 simulations for vaginal delivery (random effects consistency model). Estimates are based on a further 70,000 updates. RoB: assessment of model fit having excluded studies at high risk of bias.

| Model                 | Number of data points | Residual deviance<br>(Posterior mean) | SD (posterior median)<br>and 95% credible<br>intervals | DIC  |
|-----------------------|-----------------------|---------------------------------------|--------------------------------------------------------|------|
| FE consistency        | 194                   | 404.3                                 | -                                                      | 1394 |
| RE consistency        | 194                   | 203.2                                 | 0.53 (0.41-0.67)                                       | 1251 |
| RE inconsistency      | 194                   | 194.4                                 | 0.51 (0.38-0.66)                                       | 1247 |
| RE consistency -RoB   | 132                   | 133.4                                 | 0.47 (0.34-0.63)                                       | 867  |
| RE inconsistency -RoB | 132                   | 132.1                                 | 0.48 (0.33-0.68)                                       | 873  |

**Table 8. Model fit and selection statistics by outcomes: Fixed effect and random effects models. For random effects models we also compared the fit of consistency and inconsistency models.**

**Caesarean section:** Convergence was assessed using two chains and was achieved by 90,000 simulations for cesarean section (RE consistency model). Estimates are based on a further 180,000 updates. RoB: assessment of model fit having excluded studies at high risk of bias

| Model                 | Number of data points | Residual deviance<br>(Posterior mean) | SD (posterior median)<br>and 95% credible<br>intervals | DIC  |
|-----------------------|-----------------------|---------------------------------------|--------------------------------------------------------|------|
| FE consistency        | 551                   | 590.8                                 | -                                                      | 3058 |
| RE consistency        | 551                   | 573.3                                 | 0.10 (0.004-0.21)                                      | 3058 |
| RE inconsistency      | 551                   | 568.8                                 | 0.14 (0.01-0.25)                                       | 3101 |
| RE consistency -RoB   | 328                   | 340.3                                 | 0.09 (0.003-0.22)                                      | 1857 |
| RE inconsistency -RoB | 328                   | 343.8                                 | 0.12 (0.003-0.27)                                      | 1899 |

**Table 9. Model fit and selection statistics by outcomes: Fixed effect and random effects models. For random effects models we also compared the fit of consistency and inconsistency models.**

**Hyperstimulation:** Convergence was assessed using two chains and was achieved by 21,000 simulations (RE consistency model). Estimates are based on a further 60,000 updates. RoB: assessment of model fit having excluded studies at high risk of bias

| Model                 | Number of data points | Residual deviance<br>(Posterior mean) | SD (posterior median)<br>and 95% credible<br>intervals | DIC   |
|-----------------------|-----------------------|---------------------------------------|--------------------------------------------------------|-------|
| RE consistency        | 264                   | 285.8                                 | 0.75 (0.51- 1.07)                                      | 1074  |
| RE inconsistency      | 264                   | 268.1                                 | 0.72 (0.45- 1.07)                                      | 1061  |
| RE consistency -RoB   | 192                   | 213.4                                 | 0.70 (0.35-1.14)                                       | 791   |
| RE inconsistency -RoB | 192                   | 191.0                                 | 0.75 (0.32-1.32)                                       | 776.2 |

## Tables 10 to 14: Datafiles for all five outcomes considered in prostaglandin network meta-analysis

### Abbreviations used in all tables:

r: number of events

n: number of participants randomised

t: treatment used

**Table 10: Datafile for OpenBUGS analysis of caesarean section**

Treatments included in analysis:

- 1 Placebo
- 2 No treatment
- 3 Vaginal PGE2 (tablet)
- 4 Vaginal PGE2 (gel)
- 5 Vaginal PGE2 pessary (slow release)
- 6 PGF2 gel
- 7 Intracervical PGE2
- 8 Vaginal PGE2 pessary (normal release)
- 9 Vaginal misoprostol (Dose less than 50 mcg)
- 10 Vaginal misoprostol (Dose 50 mcg or more)
- 11 Oral misoprostol tablet (Dose less than 50 mcg)
- 12 Oral misoprostol tablet (dose 50mcg or more)
- 13 Titrated (low dose) oral misoprostol solution
- 14 Sustained release misoprostol vaginal pessary

| [r1] | [n1] | [r2] | [n2] | [r3] | [n3] | [r4] | [n4] | [t1] | [t2] | [t3] | [t4] | na[] | Trial          |
|------|------|------|------|------|------|------|------|------|------|------|------|------|----------------|
| 65   | 194  | 56   | 203  | NA   | NA   | NA   | NA   | 1    | 7    | NA   | NA   | 2    | Bernstein 1991 |
| 7    | 20   | 5    | 23   | NA   | NA   | NA   | NA   | 1    | 7    | NA   | NA   | 2    | Buttino 1990   |
| 23   | 107  | 30   | 110  | NA   | NA   | NA   | NA   | 1    | 7    | NA   | NA   | 2    | Cabrol 1988    |
| 16   | 91   | 32   | 175  | 39   | 174  | NA   | NA   | 1    | 2    | 7    | NA   | 3    | NICHHD 1994    |
| 18   | 57   | 8    | 61   | NA   | NA   | NA   | NA   | 1    | 7    | NA   | NA   | 2    | Darroca 1996   |
| 4    | 30   | 1    | 30   | NA   | NA   | NA   | NA   | 4    | 7    | NA   | NA   | 2    | Ekman 1983     |
| 7    | 49   | 5    | 48   | 6    | 52   | NA   | NA   | 3    | 7    | 10   | NA   | 3    | El-Din 2000    |
| 6    | 38   | 16   | 41   | NA   | NA   | NA   | NA   | 1    | 7    | NA   | NA   | 2    | Gilson 1993    |
| 11   | 48   | 14   | 52   | NA   | NA   | NA   | NA   | 4    | 7    | NA   | NA   | 2    | Hales 1994     |
| 6    | 60   | 3    | 60   | NA   | NA   | NA   | NA   | 1    | 7    | NA   | NA   | 2    | Heinzl 1980    |
| 2    | 44   | 2    | 44   | NA   | NA   | NA   | NA   | 2    | 7    | NA   | NA   | 2    | Hidar 2000     |
| 13   | 35   | 11   | 32   | NA   | NA   | NA   | NA   | 1    | 7    | NA   | NA   | 2    | Hutcheon 1980  |
| 31   | 125  | 39   | 122  | NA   | NA   | NA   | NA   | 4    | 7    | NA   | NA   | 2    | Irion 1998     |
| 9    | 140  | 12   | 142  | NA   | NA   | NA   | NA   | 4    | 7    | NA   | NA   | 2    | Keirse 1995    |
| 51   | 229  | 64   | 241  | NA   | NA   | NA   | NA   | 4    | 7    | NA   | NA   | 2    | Kemp 2000      |
| 10   | 43   | 5    | 41   | NA   | NA   | NA   | NA   | 1    | 7    | NA   | NA   | 2    | Larmon 2002    |
| 1    | 15   | 8    | 30   | NA   | NA   | NA   | NA   | 1    | 7    | NA   | NA   | 2    | Laube 1986     |
| 9    | 57   | 9    | 56   | NA   | NA   | NA   | NA   | 7    | 8    | NA   | NA   | 2    | Legarth 1988   |
| 8    | 47   | 6    | 46   | NA   | NA   | NA   | NA   | 1    | 7    | NA   | NA   | 2    | Lien 1998      |
| 2    | 22   | 2    | 28   | NA   | NA   | NA   | NA   | 4    | 7    | NA   | NA   | 2    | Lopes 1991     |
| 18   | 64   | 16   | 61   | NA   | NA   | NA   | NA   | 7    | 8    | NA   | NA   | 2    | Lyndrup 1991   |
| 3    | 31   | 4    | 30   | NA   | NA   | NA   | NA   | 1    | 7    | NA   | NA   | 2    | McKenna 1999   |
| 7    | 15   | 5    | 19   | NA   | NA   | NA   | NA   | 2    | 7    | NA   | NA   | 2    | Nager 1987     |
| 0    | 15   | 4    | 30   | NA   | NA   | NA   | NA   | 1    | 7    | NA   | NA   | 2    | Nimrod 1984    |
| 84   | 403  | 67   | 413  | NA   | NA   | NA   | NA   | 2    | 7    | NA   | NA   | 2    | Noah 1987      |
| 10   | 21   | 4    | 24   | NA   | NA   | NA   | NA   | 1    | 7    | NA   | NA   | 2    | Nuutila 1995   |
| 17   | 71   | 6    | 39   | NA   | NA   | NA   | NA   | 4    | 7    | NA   | NA   | 2    | Nuutila 1996   |
| 13   | 45   | 11   | 45   | NA   | NA   | NA   | NA   | 5    | 7    | NA   | NA   | 2    | Ottinger 1998  |

|     |     |     |     |    |    |    |    |    |    |    |    |   |                      |
|-----|-----|-----|-----|----|----|----|----|----|----|----|----|---|----------------------|
| 16  | 53  | 13  | 47  | NA | NA | NA | NA | 1  | 7  | NA | NA | 2 | Owen 1991            |
| 8   | 36  | 6   | 31  | NA | NA | NA | NA | 4  | 7  | NA | NA | 2 | Peccerillo 1995      |
| 9   | 36  | 9   | 35  | NA | NA | NA | NA | 2  | 7  | NA | NA | 2 | Perez Picanol 1990   |
| 7   | 30  | 9   | 33  | NA | NA | NA | NA | 5  | 7  | NA | NA | 2 | Perry 2004           |
| 21  | 116 | 22  | 110 | NA | NA | NA | NA | 7  | 8  | NA | NA | 2 | Poulsen 1991         |
| 49  | 226 | 68  | 242 | NA | NA | NA | NA | 4  | 7  | NA | NA | 2 | Rath 1999 a          |
| 19  | 155 | 16  | 173 | NA | NA | NA | NA | 3  | 4  | NA | NA | 2 | Rath 1999 b          |
| 5   | 27  | 6   | 21  | NA | NA | NA | NA | 1  | 7  | NA | NA | 2 | Richardson 1991      |
| 4   | 38  | 5   | 35  | 5  | 38 | NA | NA | 5  | 7  | 10 | NA | 3 | Ramsey 2003          |
| 18  | 98  | 16  | 110 | NA | NA | NA | NA | 3  | 7  | NA | NA | 2 | Rix 1996             |
| 3   | 31  | 5   | 37  | NA | NA | NA | NA | 4  | 7  | NA | NA | 2 | Seeras 1995          |
| 7   | 44  | 7   | 39  | NA | NA | NA | NA | 4  | 7  | NA | NA | 2 | Stempel 1997         |
| 12  | 56  | 11  | 51  | NA | NA | NA | NA | 5  | 7  | NA | NA | 2 | Strobel 2006         |
| 0   | 40  | 0   | 41  | 1  | 40 | NA | NA | 1  | 3  | 7  | NA | 3 | Thiery 1984          |
| 9   | 29  | 8   | 30  | NA | NA | NA | NA | 1  | 7  | NA | NA | 2 | Trofatter 1985       |
| 26  | 236 | 26  | 252 | NA | NA | NA | NA | 2  | 7  | NA | NA | 2 | Trofatter 1993       |
| 7   | 68  | 6   | 71  | NA | NA | NA | NA | 1  | 7  | NA | NA | 2 | Troostwijk           |
| 6   | 20  | 3   | 19  | 7  | 19 | NA | NA | 1  | 7  | 8  | NA | 3 | Ulmsten 1985         |
| 11  | 31  | 9   | 35  | NA | NA | NA | NA | 5  | 7  | NA | NA | 2 | Wieland 1999         |
| 6   | 41  | 5   | 40  | NA | NA | NA | NA | 7  | 8  | NA | NA | 2 | Yuen 1996            |
| 5   | 48  | 9   | 52  | NA | NA | NA | NA | 4  | 7  | NA | NA | 2 | Zanini 1990          |
| 20  | 115 | 17  | 120 | NA | NA | NA | NA | 2  | 7  | NA | NA | 2 | Cararach 1996        |
| 13  | 58  | 21  | 58  | NA | NA | NA | NA | 5  | 7  | NA | NA | 2 | Fachinetti 2007      |
| 5   | 9   | 1   | 10  | NA | NA | NA | NA | 7  | 8  | NA | NA | 2 | Taechakraichana 1996 |
| 15  | 112 | 9   | 88  | NA | NA | NA | NA | 3  | 7  | NA | NA | 2 | Thavarahsah 1990     |
| 24  | 66  | 22  | 62  | NA | NA | NA | NA | 5  | 7  | NA | NA | 2 | Wielgos 2007         |
| 17  | 72  | 26  | 72  | NA | NA | NA | NA | 5  | 7  | NA | NA | 2 | Facchinetti 2005     |
| 3   | 15  | 5   | 17  | NA | NA | NA | NA | 2  | 7  | NA | NA | 2 | Gittens 1996         |
| 24  | 51  | 27  | 57  | NA | NA | NA | NA | 2  | 7  | NA | NA | 2 | Herabutya 1992       |
| 6   | 26  | 6   | 22  | NA | NA | NA | NA | 3  | 7  | NA | NA | 2 | Herabutya 1993       |
| 6   | 25  | 10  | 25  | NA | NA | NA | NA | 5  | 7  | NA | NA | 2 | Lopez-Farfan 2010    |
| 8   | 19  | 6   | 21  | NA | NA | NA | NA | 2  | 7  | NA | NA | 2 | Tey 1995             |
| 31  | 125 | 39  | 122 | NA | NA | NA | NA | 4  | 7  | NA | NA | 2 | Pedrazzoli 1997      |
| 68  | 151 | 61  | 143 | NA | NA | NA | NA | 2  | 7  | NA | NA | 2 | Rayburn              |
| 7   | 75  | 7   | 75  | NA | NA | NA | NA | 2  | 7  | NA | NA | 2 | Sahraoui 2005        |
| 13  | 85  | 17  | 93  | NA | NA | NA | NA | 10 | 12 | NA | NA | 2 | Adair 1998           |
| 8   | 40  | 12  | 40  | NA | NA | NA | NA | 10 | 12 | NA | NA | 2 | Adam 2005            |
| 20  | 100 | 14  | 100 | NA | NA | NA | NA | 7  | 12 | NA | NA | 2 | Bartha 2000          |
| 22  | 78  | 10  | 78  | NA | NA | NA | NA | 1  | 12 | NA | NA | 2 | Beigi 2003           |
| 23  | 102 | 16  | 104 | NA | NA | NA | NA | 10 | 12 | NA | NA | 2 | Bennett 1998         |
| 120 | 501 | 147 | 503 | NA | NA | NA | NA | 10 | 12 | NA | NA | 2 | Carlan 2001          |
| 18  | 106 | 4   | 101 | NA | NA | NA | NA | 9  | 13 | NA | NA | 2 | Cheng 2008           |
| 3   | 32  | 7   | 66  | NA | NA | NA | NA | 1  | 12 | NA | NA | 2 | Cheung 2006          |
| 36  | 111 | 18  | 93  | NA | NA | NA | NA | 9  | 12 | NA | NA | 2 | Colon 2005           |
| 19  | 100 | 18  | 100 | NA | NA | NA | NA | 4  | 11 | NA | NA | 2 | Dallenbach 2003      |
| 100 | 376 | 83  | 365 | NA | NA | NA | NA | 4  | 13 | NA | NA | 2 | Dodd 2006            |
| 21  | 77  | 11  | 76  | NA | NA | NA | NA | 10 | 12 | NA | NA | 2 | Dyar 2000            |
| 27  | 50  | 14  | 50  | NA | NA | NA | NA | 10 | 12 | NA | NA | 2 | El Hassan 2007       |
| 14  | 64  | 12  | 62  | NA | NA | NA | NA | 10 | 12 | NA | NA | 2 | Fisher 2001          |

|    |     |    |     |    |     |    |     |    |    |    |    |   |                      |
|----|-----|----|-----|----|-----|----|-----|----|----|----|----|---|----------------------|
| 6  | 30  | 9  | 28  | NA | NA  | NA | NA  | 4  | 12 | NA | NA | 2 | Gherman 2001         |
| 8  | 48  | 9  | 59  | NA | NA  | NA | NA  | 9  | 12 | NA | NA | 2 | Hall 2002            |
| 17 | 112 | 20 | 112 | NA | NA  | NA | NA  | 4  | 12 | NA | NA | 2 | Henrich 2008         |
| 8  | 49  | 4  | 47  | NA | NA  | NA | NA  | 1  | 12 | NA | NA | 2 | Hoffman 2001         |
| 68 | 347 | 54 | 345 | NA | NA  | NA | NA  | 4  | 13 | NA | NA | 2 | Hofmeyr 2001         |
| 19 | 110 | 35 | 109 | NA | NA  | NA | NA  | 9  | 11 | NA | NA | 2 | How 2001             |
| 5  | 52  | 13 | 51  | NA | NA  | NA | NA  | 10 | 12 | NA | NA | 2 | Jindal 2011          |
| 6  | 30  | 3  | 30  | NA | NA  | NA | NA  | 9  | 12 | NA | NA | 2 | Khazardoost 2011     |
| 5  | 23  | 6  | 29  | NA | NA  | NA | NA  | 11 | 12 | NA | NA | 2 | Kipikasaa 2005       |
| 19 | 82  | 13 | 78  | NA | NA  | NA | NA  | 10 | 12 | NA | NA | 2 | Kwon 2001            |
| 22 | 95  | 22 | 96  | NA | NA  | NA | NA  | 7  | 12 | NA | NA | 2 | Langenegger 2005     |
| 82 | 240 | 42 | 120 | 39 | 120 | NA | NA  | 4  | 10 | 12 | NA | 3 | Le Roux 2002         |
| 4  | 66  | 1  | 64  | NA | NA  | NA | NA  | 1  | 12 | NA | NA | 2 | Levy 2005            |
| 11 | 51  | 10 | 51  | NA | NA  | NA | NA  | 1  | 12 | NA | NA | 2 | Lo 2003              |
| 14 | 76  | 13 | 75  | 11 | 128 | 13 | 127 | 6  | 8  | 10 | 13 | 4 | Majoko 2002          |
| 11 | 68  | 10 | 60  | NA | NA  | NA | NA  | 10 | 12 | NA | NA | 2 | Mehrotra 2010        |
| 80 | 193 | 40 | 100 | 41 | 103 | NA | NA  | 4  | 9  | 13 | NA | 3 | Moodley 2003         |
| 3  | 30  | 3  | 31  | NA | NA  | NA | NA  | 7  | 12 | NA | NA | 2 | Nagpal 2009          |
| 3  | 41  | 3  | 39  | NA | NA  | NA | NA  | 1  | 12 | NA | NA | 2 | Ngai 1996            |
| 7  | 53  | 3  | 53  | NA | NA  | NA | NA  | 10 | 12 | NA | NA | 2 | Nopdonrattakoon 2003 |
| 18 | 73  | 23 | 73  | NA | NA  | NA | NA  | 9  | 12 | NA | NA | 2 | Paisamtantiwong 2005 |
| 19 | 95  | 17 | 95  | NA | NA  | NA | NA  | 7  | 12 | NA | NA | 2 | Patil 2005           |
| 28 | 76  | 33 | 75  | NA | NA  | NA | NA  | 10 | 12 | NA | NA | 2 | Paungmora 2004       |
| 7  | 84  | 8  | 82  | NA | NA  | NA | NA  | 10 | 12 | NA | NA | 2 | Pongsatha 2005       |
| 14 | 124 | 16 | 146 | NA | NA  | NA | NA  | 10 | 12 | NA | NA | 2 | Puga 2001            |
| 27 | 150 | 25 | 150 | NA | NA  | NA | NA  | 2  | 12 | NA | NA | 2 | Rath 2007            |
| 5  | 30  | 4  | 29  | NA | NA  | NA | NA  | 9  | 12 | NA | NA | 2 | Rizvi 2007           |
| 41 | 134 | 59 | 162 | NA | NA  | NA | NA  | 9  | 12 | NA | NA | 2 | Schneider 2004       |
| 7  | 50  | 7  | 50  | 5  | 50  | NA | NA  | 7  | 9  | 12 | NA | 3 | Sheela 2007          |
| 4  | 30  | 8  | 30  | NA | NA  | NA | NA  | 9  | 12 | NA | NA | 2 | Sheikher 2009        |
| 28 | 123 | 30 | 122 | NA | NA  | NA | NA  | 10 | 12 | NA | NA | 2 | Shetty 2001          |
| 5  | 31  | 5  | 30  | NA | NA  | NA | NA  | 2  | 12 | NA | NA | 2 | Shetty 2002a         |
| 14 | 50  | 13 | 51  | NA | NA  | NA | NA  | 9  | 12 | NA | NA | 2 | Shetty 2003          |
| 27 | 100 | 25 | 100 | NA | NA  | NA | NA  | 3  | 12 | NA | NA | 2 | Shetty 2004          |
| 13 | 32  | 17 | 32  | NA | NA  | NA | NA  | 12 | 13 | NA | NA | 2 | Thaisomboon 2012     |
| 2  | 20  | 4  | 20  | NA | NA  | NA | NA  | 10 | 12 | NA | NA | 2 | Toppozada 1997       |
| 12 | 48  | 6  | 51  | NA | NA  | NA | NA  | 10 | 12 | NA | NA | 2 | Uludag 2005          |
| 25 | 110 | 15 | 110 | NA | NA  | NA | NA  | 9  | 12 | NA | NA | 2 | Wing 1999            |
| 25 | 113 | 15 | 121 | NA | NA  | NA | NA  | 9  | 12 | NA | NA | 2 | Wing 2000            |
| 32 | 110 | 34 | 110 | NA | NA  | NA | NA  | 9  | 12 | NA | NA | 2 | Rahman 2013          |
| 26 | 50  | 19 | 49  | NA | NA  | NA | NA  | 1  | 12 | NA | NA | 2 | Yazdani 2012         |
| 3  | 65  | 5  | 69  | NA | NA  | NA | NA  | 10 | 13 | NA | NA | 2 | Zvandasara 2008      |
| 18 | 80  | 9  | 80  | NA | NA  | NA | NA  | 5  | 13 | NA | NA | 2 | Rouzi 2014           |
| 37 | 100 | 41 | 100 | NA | NA  | NA | NA  | 9  | 13 | NA | NA | 2 | Souza 2013           |
| 12 | 54  | 12 | 49  | NA | NA  | NA | NA  | 1  | 4  | NA | NA | 2 | Al Malt 1995         |
| 1  | 50  | 3  | 50  | NA | NA  | NA | NA  | 2  | 5  | NA | NA | 2 | Berzircioglu 2012    |
| 17 | 39  | 15 | 38  | NA | NA  | NA | NA  | 1  | 8  | NA | NA | 2 | Buchanan 1984        |
| 6  | 104 | 10 | 95  | NA | NA  | NA | NA  | 1  | 8  | NA | NA | 2 | Campbell 1984        |
| 20 | 207 | 25 | 195 | NA | NA  | NA | NA  | 2  | 8  | NA | NA | 2 | Cardozo 1986         |

|    |     |    |     |    |    |    |    |   |    |    |    |   |                  |
|----|-----|----|-----|----|----|----|----|---|----|----|----|---|------------------|
| 5  | 18  | 7  | 15  | NA | NA | NA | NA | 1 | 4  | NA | NA | 2 | Chatterjee 1990  |
| 12 | 76  | 11 | 79  | NA | NA | NA | NA | 1 | 8  | NA | NA | 2 | Chua 1995        |
| 7  | 29  | 7  | 30  | NA | NA | NA | NA | 1 | 4  | NA | NA | 2 | Chung 1992       |
| 13 | 26  | 14 | 28  | NA | NA | NA | NA | 1 | 4  | NA | NA | 2 | Curet 1989       |
| 1  | 28  | 3  | 37  | NA | NA | NA | NA | 1 | 4  | NA | NA | 2 | Doany 1997       |
| 3  | 28  | 5  | 28  | NA | NA | NA | NA | 1 | 3  | NA | NA | 2 | Domisse 1980     |
| 3  | 165 | 2  | 180 | NA | NA | NA | NA | 2 | 3  | NA | NA | 2 | Husslein 1986    |
| 4  | 100 | 4  | 100 | NA | NA | NA | NA | 3 | 8  | NA | NA | 2 | El Mardi 1991    |
| 3  | 38  | 5  | 34  | NA | NA | NA | NA | 4 | 5  | NA | NA | 2 | El Shawarby 2006 |
| 21 | 72  | 23 | 72  | NA | NA | NA | NA | 4 | 5  | NA | NA | 2 | Ferraiolo 2010   |
| 3  | 20  | 16 | 60  | NA | NA | NA | NA | 1 | 4  | NA | NA | 2 | Graves 1985      |
| 8  | 54  | 7  | 53  | NA | NA | NA | NA | 4 | 5  | NA | NA | 2 | Green 1998       |
| 4  | 15  | 12 | 45  | NA | NA | NA | NA | 1 | 4  | NA | NA | 2 | Hayashi 1988     |
| 8  | 60  | 14 | 60  | NA | NA | NA | NA | 4 | 5  | NA | NA | 2 | Kalkat 2008      |
| 9  | 32  | 7  | 52  | NA | NA | NA | NA | 1 | 8  | NA | NA | 2 | Liggins 1979     |
| 3  | 16  | 2  | 16  | 2  | 16 | NA | NA | 1 | 4  | 6  | NA | 3 | MacKenzie 1979   |
| 12 | 40  | 6  | 40  | NA | NA | NA | NA | 3 | 4  | NA | NA | 2 | Mahmood 1989     |
| 12 | 110 | 13 | 110 | NA | NA | NA | NA | 2 | 4  | NA | NA | 2 | Mahmood 1992     |
| 2  | 50  | 0  | 50  | NA | NA | NA | NA | 2 | 4  | NA | NA | 2 | Mahmood 1995     |
| 1  | 31  | 3  | 35  | NA | NA | NA | NA | 2 | 4  | NA | NA | 2 | McCaul 1997      |
| 2  | 12  | 1  | 12  | NA | NA | NA | NA | 3 | 5  | NA | NA | 2 | McLauren 1987    |
| 6  | 20  | 4  | 20  | NA | NA | NA | NA | 4 | 5  | NA | NA | 2 | Miller 1991      |
| 9  | 100 | 10 | 165 | NA | NA | NA | NA | 1 | 6  | NA | NA | 2 | Murphy 1980      |
| 25 | 100 | 24 | 100 | NA | NA | NA | NA | 3 | 4  | NA | NA | 2 | Murray 1995      |
| 9  | 38  | 9  | 38  | NA | NA | NA | NA | 4 | 6  | NA | NA | 2 | Neilson 1983     |
| 9  | 30  | 8  | 28  | NA | NA | NA | NA | 2 | 4  | NA | NA | 2 | Newman 1997      |
| 10 | 50  | 7  | 50  | NA | NA | NA | NA | 1 | 4  | NA | NA | 2 | O'Brien 1995     |
| 11 | 45  | 15 | 45  | NA | NA | NA | NA | 4 | 8  | NA | NA | 2 | Perryman 1992    |
| 5  | 50  | 13 | 50  | NA | NA | NA | NA | 2 | 4  | NA | NA | 2 | Poornima 2011    |
| 11 | 36  | 8  | 33  | NA | NA | NA | NA | 1 | 5  | NA | NA | 2 | Prasad 1989      |
| 7  | 15  | 4  | 15  | NA | NA | NA | NA | 1 | 4  | NA | NA | 2 | Prins 1983       |
| 27 | 100 | 30 | 100 | NA | NA | NA | NA | 3 | 5  | NA | NA | 2 | Rabl 2002        |
| 21 | 63  | 10 | 55  | NA | NA | NA | NA | 1 | 4  | NA | NA | 2 | Rayburn 1988     |
| 18 | 105 | 16 | 96  | NA | NA | NA | NA | 2 | 8  | NA | NA | 2 | Roach 1997       |
| 4  | 26  | 6  | 24  | NA | NA | NA | NA | 1 | 4  | NA | NA | 2 | Sawai 1991       |
| 6  | 42  | 1  | 38  | NA | NA | NA | NA | 1 | 8  | NA | NA | 2 | Sawai 1994       |
| 16 | 100 | 11 | 100 | NA | NA | NA | NA | 2 | 3  | NA | NA | 2 | Shoab 1994       |
| 4  | 34  | 5  | 35  | NA | NA | NA | NA | 4 | 8  | NA | NA | 2 | Smith 1990       |
| 4  | 55  | 3  | 66  | NA | NA | NA | NA | 4 | 5  | NA | NA | 2 | Smith 1994       |
| 17 | 135 | 15 | 132 | NA | NA | NA | NA | 3 | 8  | NA | NA | 2 | Sorensen 1992    |
| 28 | 83  | 29 | 82  | NA | NA | NA | NA | 3 | 4  | NA | NA | 2 | Taher 2010       |
| 6  | 34  | 4  | 35  | NA | NA | NA | NA | 4 | 5  | NA | NA | 2 | Thomlinson 2001  |
| 20 | 65  | 16 | 65  | NA | NA | NA | NA | 4 | 5  | NA | NA | 2 | Triglia 2010     |
| 13 | 33  | 9  | 39  | NA | NA | NA | NA | 1 | 5  | NA | NA | 2 | Witter 1992      |
| 10 | 26  | 9  | 26  | NA | NA | NA | NA | 4 | 5  | NA | NA | 2 | Zaconato 2011    |
| 9  | 60  | 16 | 60  | NA | NA | NA | NA | 7 | 10 | NA | NA | 2 | Argarwal 2003    |
| 2  | 83  | 9  | 83  | NA | NA | NA | NA | 9 | 10 | NA | NA | 2 | Bounyasong 2000  |
| 17 | 79  | 27 | 76  | NA | NA | NA | NA | 7 | 10 | NA | NA | 2 | Buser 1997       |
| 2  | 30  | 3  | 30  | NA | NA | NA | NA | 3 | 10 | NA | NA | 2 | Chang 1997       |

|    |     |    |     |    |    |    |    |   |    |    |    |   |                    |
|----|-----|----|-----|----|----|----|----|---|----|----|----|---|--------------------|
| 13 | 71  | 18 | 72  | NA | NA | NA | NA | 3 | 10 | NA | NA | 2 | Charoenkul 2000    |
| 10 | 50  | 10 | 49  | NA | NA | NA | NA | 7 | 10 | NA | NA | 2 | Chuck 1995         |
| 20 | 66  | 11 | 72  | NA | NA | NA | NA | 7 | 9  | NA | NA | 2 | Clark 1998         |
| 23 | 75  | 15 | 75  | NA | NA | NA | NA | 2 | 9  | NA | NA | 2 | Da Graca 2005      |
| 14 | 106 | 12 | 105 | NA | NA | NA | NA | 4 | 10 | NA | NA | 2 | Danielian 1999     |
| 21 | 65  | 10 | 65  | NA | NA | NA | NA | 7 | 10 | NA | NA | 2 | Denguezli 2007     |
| 44 | 125 | 40 | 126 | NA | NA | NA | NA | 9 | 10 | NA | NA | 2 | Diro 1999          |
| 16 | 93  | 13 | 92  | NA | NA | NA | NA | 9 | 10 | NA | NA | 2 | El Sherbiny 2001   |
| 22 | 60  | 10 | 60  | NA | NA | NA | NA | 3 | 10 | NA | NA | 2 | El Hassan 2004     |
| 10 | 31  | 2  | 32  | NA | NA | NA | NA | 9 | 10 | NA | NA | 2 | El Hassan 2005     |
| 14 | 73  | 17 | 74  | NA | NA | NA | NA | 9 | 10 | NA | NA | 2 | Eroglu 2007        |
| 23 | 192 | 33 | 207 | NA | NA | NA | NA | 9 | 10 | NA | NA | 2 | Farah 1997         |
| 3  | 21  | 2  | 24  | NA | NA | NA | NA | 1 | 10 | NA | NA | 2 | Fletcher 1993      |
| 3  | 31  | 1  | 32  | NA | NA | NA | NA | 3 | 10 | NA | NA | 2 | Fletcher 1994      |
| 14 | 55  | 10 | 54  | NA | NA | NA | NA | 4 | 10 | NA | NA | 2 | Frohn 2002         |
| 35 | 89  | 28 | 97  | NA | NA | NA | NA | 5 | 10 | NA | NA | 2 | Garry 2003         |
| 66 | 300 | 17 | 100 | NA | NA | NA | NA | 2 | 10 | NA | NA | 2 | Gelisen 2005       |
| 10 | 37  | 7  | 38  | NA | NA | NA | NA | 4 | 10 | NA | NA | 2 | Gottschall 2007    |
| 31 | 129 | 36 | 139 | NA | NA | NA | NA | 4 | 9  | NA | NA | 2 | Gregson 2005       |
| 12 | 58  | 22 | 56  | NA | NA | NA | NA | 9 | 10 | NA | NA | 2 | Has 2002           |
| 16 | 50  | 19 | 60  | NA | NA | NA | NA | 7 | 10 | NA | NA | 2 | Herabutya 1997     |
| 15 | 36  | 6  | 36  | NA | NA | NA | NA | 4 | 10 | NA | NA | 2 | Howarth 1996       |
| 11 | 63  | 14 | 57  | NA | NA | NA | NA | 1 | 9  | NA | NA | 2 | Incerpi 2001       |
| 22 | 112 | 12 | 112 | NA | NA | NA | NA | 7 | 10 | NA | NA | 2 | Kadanali 1996      |
| 11 | 39  | 15 | 39  | 11 | 40 | NA | NA | 5 | 9  | 10 | NA | 3 | Khoury 2001        |
| 21 | 78  | 23 | 81  | NA | NA | NA | NA | 7 | 10 | NA | NA | 2 | Kolderup 1999      |
| 7  | 30  | 4  | 30  | NA | NA | NA | NA | 3 | 10 | NA | NA | 2 | Kovavisarach 1997  |
| 4  | 40  | 6  | 40  | NA | NA | NA | NA | 3 | 10 | NA | NA | 2 | Kovavisarach 1998  |
| 8  | 50  | 6  | 50  | NA | NA | NA | NA | 7 | 9  | NA | NA | 2 | Krithika 2008      |
| 3  | 20  | 1  | 20  | NA | NA | NA | NA | 7 | 10 | NA | NA | 2 | Kulshreshtha 2007  |
| 23 | 100 | 18 | 100 | NA | NA | NA | NA | 7 | 9  | NA | NA | 2 | Kumar 2001         |
| 4  | 25  | 2  | 25  | NA | NA | NA | NA | 3 | 10 | NA | NA | 2 | Lee 1997           |
| 10 | 40  | 10 | 44  | NA | NA | NA | NA | 7 | 10 | NA | NA | 2 | Lemancewicz 1999   |
| 5  | 19  | 3  | 17  | NA | NA | NA | NA | 7 | 10 | NA | NA | 2 | Matgibay 1998      |
| 9  | 35  | 9  | 33  | NA | NA | NA | NA | 1 | 9  | NA | NA | 2 | McKenna 2004       |
| 14 | 100 | 18 | 100 | NA | NA | NA | NA | 7 | 10 | NA | NA | 2 | Megalo 2004        |
| 11 | 60  | 13 | 60  | NA | NA | NA | NA | 9 | 10 | NA | NA | 2 | Meydanli 2003      |
| 4  | 29  | 7  | 32  | NA | NA | NA | NA | 7 | 10 | NA | NA | 2 | Neiger 2001        |
| 12 | 94  | 13 | 95  | NA | NA | NA | NA | 4 | 10 | NA | NA | 2 | Nunes 1999         |
| 7  | 39  | 3  | 38  | NA | NA | NA | NA | 2 | 9  | NA | NA | 2 | Oboro 2005         |
| 11 | 83  | 6  | 80  | NA | NA | NA | NA | 3 | 10 | NA | NA | 2 | Papanikolaou 2004  |
| 43 | 225 | 38 | 210 | NA | NA | NA | NA | 4 | 10 | NA | NA | 2 | Pandis 2001        |
| 16 | 63  | 13 | 62  | NA | NA | NA | NA | 8 | 10 | NA | NA | 2 | Rowlands 2001      |
| 30 | 185 | 33 | 184 | NA | NA | NA | NA | 4 | 10 | NA | NA | 2 | Rozenberg 2001     |
| 16 | 70  | 13 | 70  | NA | NA | NA | NA | 5 | 10 | NA | NA | 2 | Rozenberg 2004     |
| 5  | 27  | 1  | 30  | NA | NA | NA | NA | 4 | 10 | NA | NA | 2 | Saggaf 2001        |
| 11 | 75  | 9  | 73  | NA | NA | NA | NA | 8 | 10 | NA | NA | 2 | Saleem 2006        |
| 15 | 115 | 24 | 108 | NA | NA | NA | NA | 5 | 10 | NA | NA | 2 | Sanchez Ramos 1998 |
| 55 | 211 | 51 | 204 | NA | NA | NA | NA | 3 | 10 | NA | NA | 2 | Sifakis 2007       |



|     |      |     |      |    |    |    |    |    |    |    |    |   |                  |
|-----|------|-----|------|----|----|----|----|----|----|----|----|---|------------------|
| 8   | 30   | 6   | 32   | NA | NA | NA | NA | 1  | 10 | NA | NA | 2 | Srisomboon 1996  |
| 6   | 15   | 1   | 15   | NA | NA | NA | NA | 4  | 10 | NA | NA | 2 | Steytler 1995    |
| 8   | 33   | 4   | 27   | NA | NA | NA | NA | 1  | 9  | NA | NA | 2 | Stitely 2000     |
| 7   | 50   | 6   | 50   | NA | NA | NA | NA | 3  | 10 | NA | NA | 2 | Surbek 1997      |
| 15  | 59   | 17  | 68   | NA | NA | NA | NA | 7  | 10 | NA | NA | 2 | Tabor 1995       |
| 6   | 25   | 2   | 27   | NA | NA | NA | NA | 1  | 10 | NA | NA | 2 | Thomas 2000      |
| 38  | 137  | 28  | 138  | NA | NA | NA | NA | 7  | 9  | NA | NA | 2 | Wing 1995        |
| 24  | 100  | 15  | 100  | NA | NA | NA | NA | 7  | 9  | NA | NA | 2 | Anand 2012       |
| 18  | 60   | 4   | 60   | NA | NA | NA | NA | 3  | 10 | NA | NA | 2 | Ayaz 2010        |
| 15  | 102  | 8   | 105  | NA | NA | NA | NA | 4  | 9  | NA | NA | 2 | Chaudhuri 2011   |
| 29  | 100  | 22  | 100  | NA | NA | NA | NA | 7  | 9  | NA | NA | 2 | Chitraker 2012   |
| 12  | 52   | 16  | 54   | NA | NA | NA | NA | 4  | 9  | NA | NA | 2 | Deo 2012         |
| 12  | 50   | 10  | 50   | NA | NA | NA | NA | 9  | 10 | NA | NA | 2 | Girija 2009      |
| 42  | 161  | 40  | 159  | NA | NA | NA | NA | 7  | 9  | NA | NA | 2 | Girija 2011      |
| 15  | 80   | 11  | 68   | NA | NA | NA | NA | 9  | 10 | NA | NA | 2 | Gupta 2010       |
| 15  | 55   | 13  | 52   | NA | NA | NA | NA | 4  | 10 | NA | NA | 2 | Hosli 2008       |
| 5   | 74   | 3   | 39   | NA | NA | NA | NA | 3  | 10 | NA | NA | 2 | Kim 2000         |
| 37  | 95   | 29  | 96   | NA | NA | NA | NA | 4  | 10 | NA | NA | 2 | Lukugamage 2003  |
| 10  | 60   | 17  | 60   | NA | NA | NA | NA | 9  | 10 | NA | NA | 2 | Nigam 2010       |
| 18  | 56   | 14  | 56   | NA | NA | NA | NA | 5  | 10 | NA | NA | 2 | Ozkan 2009       |
| 50  | 191  | 56  | 199  | NA | NA | NA | NA | 4  | 9  | NA | NA | 2 | Prager 2008      |
| 22  | 70   | 21  | 70   | 21 | 70 | NA | NA | 7  | 9  | 10 | NA | 3 | Saxena 2011      |
| 10  | 31   | 10  | 35   | NA | NA | NA | NA | 7  | 10 | NA | NA | 2 | Shakya 2010      |
| 10  | 57   | 23  | 112  | NA | NA | NA | NA | 8  | 9  | NA | NA | 2 | Tan 2010         |
| 33  | 150  | 37  | 150  | NA | NA | NA | NA | 7  | 10 | NA | NA | 2 | Trabelsi 2012    |
| 70  | 340  | 53  | 341  | NA | NA | NA | NA | 4  | 9  | NA | NA | 2 | Van Germund 2004 |
| 3   | 33   | 8   | 36   | NA | NA | NA | NA | 7  | 9  | NA | NA | 2 | Varaklis 1995    |
| 5   | 27   | 6   | 21   | NA | NA | NA | NA | 9  | 10 | NA | NA | 2 | Wang 1998        |
| 13  | 67   | 10  | 68   | NA | NA | NA | NA | 7  | 10 | NA | NA | 2 | Wing 1995        |
| 20  | 98   | 18  | 99   | NA | NA | NA | NA | 5  | 9  | NA | NA | 2 | Wing 1997        |
| 115 | 436  | 243 | 871  | NA | NA | NA | NA | 5  | 14 | NA | NA | 2 | Wing 2008        |
| 184 | 680  | 176 | 678  | NA | NA | NA | NA | 5  | 14 | NA | NA | 2 | Wing 2013        |
| 0   | 42   | 1   | 43   | NA | NA | NA | NA | 1  | 10 | NA | NA | 2 | Deng 1999        |
| 14  | 100  | 6   | 100  | NA | NA | NA | NA | 9  | 12 | NA | NA | 2 | Komala 2013      |
| 8   | 42   | 9   | 42   | NA | NA | NA | NA | 7  | 9  | NA | NA | 2 | Meyer 2002       |
| 5   | 25   | 2   | 25   | NA | NA | NA | NA | 7  | 10 | NA | NA | 2 | Sahu 2004        |
| 8   | 36   | 15  | 37   | NA | NA | NA | NA | 5  | 7  | NA | NA | 2 | Chyu 1997        |
| 11  | 111  | 9   | 122  | NA | NA | NA | NA | 4  | 7  | NA | NA | 2 | Corrado 2001     |
| 138 | 1261 | 121 | 1259 | NA | NA | NA | NA | 2  | 4  | NA | NA | 2 | Hannah 1996      |
| 3   | 40   | 2   | 40   | NA | NA | NA | NA | 1  | 6  | NA | NA | 2 | MacLennan 1979   |
| 7   | 50   | 8   | 50   | NA | NA | NA | NA | 7  | 9  | NA | NA | 2 | Nanda 2007       |
| 17  | 50   | 15  | 50   | NA | NA | NA | NA | 10 | 12 | NA | NA | 2 | Sultana 2006     |
| 29  | 132  | 34  | 135  | NA | NA | NA | NA | 4  | 12 | NA | NA | 2 | Tessier 1997     |
| 3   | 165  | 2   | 180  | NA | NA | NA | NA | 2  | 3  | NA | NA | 2 | Egarter 1989     |
| 13  | 35   | 8   | 37   | NA | NA | NA | NA | 7  | 9  | NA | NA | 2 | Murthy 2006      |
| 0   | 25   | 0   | 25   | NA | NA | NA | NA | 2  | 7  | NA | NA | 2 | Ulmsten 1983     |
| 0   | 12   | 0   | 12   | NA | NA | NA | NA | 3  | 4  | NA | NA | 2 | Greer 1990       |

**Table 11: Datafile for OpenBUGS analysis of vaginal delivery not within 24 hours**

Treatments included in analysis

- 1 Placebo
- 2 No treatment
- 3 Vaginal PGE2 (tablet)
- 4 Vaginal PGE2 (gel)
- 5 Vaginal PGE2 pessary (slow release)
- 6 Intracervical PGE2
- 7 Vaginal PGE2 pessary (normal release)
- 8 Vaginal misoprostol (Dose less than 50 mcg)
- 9 Vaginal misoprostol (Dose 50 mcg or more)
- 10 Oral misoprostol tablet (Dose less than 50 mcg)
- 11 Oral misoprostol tablet (dose 50mcg or more)
- 12 Titrated (low dose) oral misoprostol solution
- 13 Sustained release misoprostol vaginal pessary

| [r,1] | [n,1] | [r,2] | [n,2] | [r,3] | [n,3] | [r,4] | [n,4] | [t,1] | [t,2] | [t,3] | [t,4] | na[] | Trial name       |
|-------|-------|-------|-------|-------|-------|-------|-------|-------|-------|-------|-------|------|------------------|
| 20    | 20    | 19    | 23    | NA    | NA    | NA    | NA    | 1     | 6     | NA    | NA    | 2    | Buttino 1990     |
| 13    | 15    | 3     | 15    | NA    | NA    | NA    | NA    | 1     | 6     | NA    | NA    | 2    | Grunberger 1986  |
| 36    | 48    | 42    | 52    | NA    | NA    | NA    | NA    | 4     | 6     | NA    | NA    | 2    | Hales 1994       |
| 56    | 60    | 40    | 60    | NA    | NA    | NA    | NA    | 1     | 6     | NA    | NA    | 2    | Heinzl 1980      |
| 36    | 140   | 39    | 142   | NA    | NA    | NA    | NA    | 4     | 6     | NA    | NA    | 2    | Keirse 1995      |
| 42    | 229   | 78    | 241   | NA    | NA    | NA    | NA    | 4     | 6     | NA    | NA    | 2    | Kemp 2000        |
| 32    | 50    | 13    | 48    | NA    | NA    | NA    | NA    | 6     | 7     | NA    | NA    | 2    | Legarth 1988     |
| 53    | 64    | 50    | 61    | NA    | NA    | NA    | NA    | 6     | 7     | NA    | NA    | 2    | Lyndrup 1991     |
| 24    | 45    | 27    | 45    | NA    | NA    | NA    | NA    | 5     | 6     | NA    | NA    | 2    | Ottinger 1998    |
| 49    | 116   | 45    | 110   | NA    | NA    | NA    | NA    | 6     | 7     | NA    | NA    | 2    | Poulsen 1991     |
| 35    | 226   | 59    | 242   | NA    | NA    | NA    | NA    | 4     | 6     | NA    | NA    | 2    | Rath 1999 a      |
| 36    | 155   | 42    | 173   | NA    | NA    | NA    | NA    | 3     | 4     | NA    | NA    | 2    | Rath 1999 b      |
| 42    | 98    | 54    | 110   | NA    | NA    | NA    | NA    | 3     | 6     | NA    | NA    | 2    | Rix 1996         |
| 18    | 56    | 25    | 51    | NA    | NA    | NA    | NA    | 5     | 6     | NA    | NA    | 2    | Strobel 2006     |
| 23    | 25    | 14    | 25    | NA    | NA    | NA    | NA    | 1     | 6     | NA    | NA    | 2    | Ulmsten 1983     |
| 18    | 20    | 8     | 19    | 15    | 19    | NA    | NA    | 1     | 6     | 7     | NA    | 3    | Ulmsten 1985     |
| 22    | 41    | 25    | 40    | NA    | NA    | NA    | NA    | 6     | 7     | NA    | NA    | 2    | Yuen 1996        |
| 25    | 58    | 39    | 58    | NA    | NA    | NA    | NA    | 5     | 6     | NA    | NA    | 2    | Fachinetti 2007  |
| 34    | 72    | 32    | 72    | NA    | NA    | NA    | NA    | 5     | 6     | NA    | NA    | 2    | Facchinetti 2005 |
| 23    | 85    | 26    | 93    | NA    | NA    | NA    | NA    | 9     | 11    | NA    | NA    | 2    | Adair 1998       |
| 50    | 100   | 36    | 100   | NA    | NA    | NA    | NA    | 6     | 11    | NA    | NA    | 2    | Bartha 2000      |
| 49    | 106   | 6     | 101   | NA    | NA    | NA    | NA    | 8     | 12    | NA    | NA    | 2    | Cheng 2008       |
| 48    | 111   | 37    | 93    | NA    | NA    | NA    | NA    | 8     | 11    | NA    | NA    | 2    | Colon 2005       |
| 38    | 100   | 44    | 100   | NA    | NA    | NA    | NA    | 4     | 10    | NA    | NA    | 2    | Dallenbach 2003  |
| 155   | 376   | 168   | 365   | NA    | NA    | NA    | NA    | 4     | 12    | NA    | NA    | 2    | Dodd 2006        |
| 47    | 64    | 32    | 62    | NA    | NA    | NA    | NA    | 9     | 11    | NA    | NA    | 2    | Fisher 2001      |
| 52    | 112   | 66    | 112   | NA    | NA    | NA    | NA    | 4     | 11    | NA    | NA    | 2    | Henrich 2008     |
| 20    | 49    | 3     | 47    | NA    | NA    | NA    | NA    | 1     | 11    | NA    | NA    | 2    | Hoffman 2001     |
| 123   | 349   | 133   | 346   | NA    | NA    | NA    | NA    | 4     | 12    | NA    | NA    | 2    | Hofmeyr 2001     |
| 36    | 110   | 69    | 109   | NA    | NA    | NA    | NA    | 8     | 10    | NA    | NA    | 2    | How 2001         |
| 50    | 95    | 45    | 96    | NA    | NA    | NA    | NA    | 6     | 11    | NA    | NA    | 2    | Langenegger 2005 |
| 109   | 240   | 51    | 120   | 73    | 120   | NA    | NA    | 4     | 9     | 11    | NA    | 3    | Le Roux 2002     |
| 19    | 66    | 3     | 64    | NA    | NA    | NA    | NA    | 1     | 11    | NA    | NA    | 2    | Levy 2005        |
| 18    | 68    | 25    | 60    | NA    | NA    | NA    | NA    | 9     | 11    | NA    | NA    | 2    | Mehrotra 2010    |

|     |     |    |     |    |     |    |    |    |    |    |    |   |                      |
|-----|-----|----|-----|----|-----|----|----|----|----|----|----|---|----------------------|
| 89  | 193 | 46 | 100 | 46 | 103 | NA | NA | 4  | 8  | 12 | NA | 3 | Moodley 2003         |
| 8   | 30  | 4  | 31  | NA | NA  | NA | NA | 6  | 11 | NA | NA | 2 | Nagpal 2009          |
| 4   | 53  | 15 | 53  | NA | NA  | NA | NA | 9  | 11 | NA | NA | 2 | Nopdonrattakoon 2003 |
| 14  | 30  | 12 | 29  | NA | NA  | NA | NA | 8  | 11 | NA | NA | 2 | Rizvi 2007           |
| 28  | 50  | 17 | 50  | 40 | 50  | NA | NA | 6  | 8  | 11 | NA | 3 | Sheela 2007          |
| 4   | 30  | 17 | 30  | NA | NA  | NA | NA | 8  | 11 | NA | NA | 2 | Sheikher 2009        |
| 47  | 123 | 78 | 122 | NA | NA  | NA | NA | 9  | 11 | NA | NA | 2 | Shetty 2001          |
| 24  | 31  | 12 | 30  | NA | NA  | NA | NA | 2  | 11 | NA | NA | 2 | Shetty 2002a         |
| 24  | 50  | 35 | 51  | NA | NA  | NA | NA | 8  | 11 | NA | NA | 2 | Shetty 2003          |
| 60  | 100 | 62 | 100 | NA | NA  | NA | NA | 3  | 11 | NA | NA | 2 | Shetty 2004          |
| 17  | 32  | 23 | 32  | NA | NA  | NA | NA | 11 | 12 | NA | NA | 2 | Thaisomboon 2012     |
| 58  | 110 | 76 | 110 | NA | NA  | NA | NA | 8  | 11 | NA | NA | 2 | Wing 1999            |
| 59  | 113 | 47 | 121 | NA | NA  | NA | NA | 8  | 11 | NA | NA | 2 | Wing 2000            |
| 25  | 42  | 4  | 42  | NA | NA  | NA | NA | 2  | 11 | NA | NA | 2 | Ayaz 2008            |
| 52  | 110 | 56 | 110 | NA | NA  | NA | NA | 8  | 11 | NA | NA | 2 | Rahman 2013          |
| 36  | 80  | 24 | 80  | NA | NA  | NA | NA | 5  | 12 | NA | NA | 2 | Rouzi 2014           |
| 58  | 100 | 63 | 100 | NA | NA  | NA | NA | 8  | 12 | NA | NA | 2 | Souza 2013           |
| 24  | 36  | 20 | 37  | NA | NA  | NA | NA | 3  | 4  | NA | NA | 2 | Al Sebai 1992        |
| 20  | 60  | 22 | 60  | NA | NA  | NA | NA | 4  | 5  | NA | NA | 2 | Kalkat 2008          |
| 22  | 50  | 10 | 50  | NA | NA  | NA | NA | 2  | 4  | NA | NA | 2 | Mahmood 1995         |
| 45  | 100 | 49 | 100 | NA | NA  | NA | NA | 3  | 5  | NA | NA | 2 | Rabl 2002            |
| 51  | 71  | 47 | 72  | NA | NA  | NA | NA | 3  | 9  | NA | NA | 2 | Charoenkul 2000      |
| 23  | 50  | 10 | 49  | NA | NA  | NA | NA | 6  | 9  | NA | NA | 2 | Chuck 1995           |
| 52  | 106 | 21 | 105 | NA | NA  | NA | NA | 4  | 9  | NA | NA | 2 | Danielian 1999       |
| 30  | 65  | 16 | 65  | NA | NA  | NA | NA | 6  | 9  | NA | NA | 2 | Denguezli 2007       |
| 47  | 192 | 56 | 207 | NA | NA  | NA | NA | 8  | 9  | NA | NA | 2 | Farah 1997           |
| 55  | 89  | 31 | 97  | NA | NA  | NA | NA | 5  | 9  | NA | NA | 2 | Garry 2003           |
| 33  | 58  | 35 | 56  | NA | NA  | NA | NA | 8  | 9  | NA | NA | 2 | Has 2002             |
| 22  | 39  | 21 | 39  | 21 | 40  | NA | NA | 5  | 8  | 9  | NA | 3 | Khoury 2001          |
| 50  | 78  | 38 | 81  | NA | NA  | NA | NA | 6  | 9  | NA | NA | 2 | Kolderup 1999        |
| 26  | 50  | 6  | 50  | NA | NA  | NA | NA | 6  | 8  | NA | NA | 2 | Krithika 2008        |
| 3   | 20  | 1  | 20  | NA | NA  | NA | NA | 6  | 9  | NA | NA | 2 | Kulshreshtha 2007    |
| 30  | 100 | 26 | 100 | NA | NA  | NA | NA | 6  | 8  | NA | NA | 2 | Kumar 2001           |
| 39  | 100 | 20 | 100 | NA | NA  | NA | NA | 6  | 9  | NA | NA | 2 | Megalo 2004          |
| 11  | 60  | 13 | 60  | NA | NA  | NA | NA | 8  | 9  | NA | NA | 2 | Meydanli 2003        |
| 25  | 94  | 23 | 95  | NA | NA  | NA | NA | 4  | 9  | NA | NA | 2 | Nunes 1999           |
| 6   | 83  | 1  | 80  | NA | NA  | NA | NA | 3  | 9  | NA | NA | 2 | Papanikolaou 2004    |
| 103 | 225 | 72 | 210 | NA | NA  | NA | NA | 4  | 9  | NA | NA | 2 | Pandis 2001          |
| 80  | 185 | 60 | 184 | NA | NA  | NA | NA | 4  | 9  | NA | NA | 2 | Rozenberg 2001       |
| 45  | 115 | 31 | 108 | NA | NA  | NA | NA | 5  | 9  | NA | NA | 2 | Sanchez Ramos 1998   |
| 82  | 211 | 61 | 204 | NA | NA  | NA | NA | 3  | 9  | NA | NA | 2 | Sifakis 2007         |
| 96  | 137 | 66 | 138 | NA | NA  | NA | NA | 6  | 8  | NA | NA | 2 | Wing 1995            |
| 31  | 100 | 16 | 100 | NA | NA  | NA | NA | 6  | 8  | NA | NA | 2 | Anand 2012           |
| 50  | 100 | 40 | 100 | NA | NA  | NA | NA | 6  | 8  | NA | NA | 2 | Chitraker 2012       |
| 57  | 57  | 17 | 56  | NA | NA  | NA | NA | 2  | 9  | NA | NA | 2 | Frass 2011           |
| 16  | 50  | 20 | 50  | NA | NA  | NA | NA | 8  | 9  | NA | NA | 2 | Girija 2009          |
| 55  | 161 | 61 | 159 | NA | NA  | NA | NA | 6  | 8  | NA | NA | 2 | Girija 2011          |
| 38  | 80  | 24 | 68  | NA | NA  | NA | NA | 8  | 9  | NA | NA | 2 | Gupta 2010           |
| 32  | 74  | 8  | 39  | NA | NA  | NA | NA | 3  | 9  | NA | NA | 2 | Kim 2000             |

|     |     |     |     |    |    |    |    |   |    |    |    |   |                  |
|-----|-----|-----|-----|----|----|----|----|---|----|----|----|---|------------------|
| 14  | 60  | 20  | 60  | NA | NA | NA | NA | 8 | 9  | NA | NA | 2 | Nigam 2010       |
| 20  | 56  | 15  | 56  | NA | NA | NA | NA | 5 | 9  | NA | NA | 2 | Ozkan 2009       |
| 29  | 70  | 26  | 70  | 24 | 70 | NA | NA | 6 | 8  | 9  | NA | 3 | Saxena 2011      |
| 141 | 340 | 177 | 341 | NA | NA | NA | NA | 4 | 8  | NA | NA | 2 | Van Germund 2004 |
| 35  | 67  | 20  | 68  | NA | NA | NA | NA | 6 | 9  | NA | NA | 2 | Wing 1995        |
| 53  | 98  | 48  | 99  | NA | NA | NA | NA | 5 | 8  | NA | NA | 2 | Wing 1997        |
| 214 | 426 | 424 | 871 | NA | NA | NA | NA | 5 | 13 | NA | NA | 2 | Wing 2008        |
| 449 | 680 | 308 | 678 | NA | NA | NA | NA | 5 | 13 | NA | NA | 2 | Wing 2013        |
| 7   | 25  | 2   | 25  | NA | NA | NA | NA | 6 | 9  | NA | NA | 2 | Sahu 2004        |
| 42  | 111 | 43  | 122 | NA | NA | NA | NA | 4 | 6  | NA | NA | 2 | Corrado 2001     |
| 15  | 35  | 8   | 37  | NA | NA | NA | NA | 6 | 8  | NA | NA | 2 | Murthy 2006      |
| 36  | 36  | 33  | 33  | NA | NA | NA | NA | 2 | 5  | NA | NA | 2 | Prasad 1989      |

**Table 12: Datafile for OpenBUGS analysis of Hyperstimulation (with fetal heart rate changes)**

Treatments included in the analysis

- 1 Placebo
- 2 No treatment
- 3 Vaginal PGE2 (tablet)
- 4 Vaginal PGE2 (gel)
- 5 Vaginal PGE2 pessary (slow release)
- 6 Intracervical PGE2
- 7 Vaginal PGE2 pessary (normal release)
- 8 Vaginal misoprostol (Dose less than 50 mcg)
- 9 Vaginal misoprostol (Dose 50 mcg or more)
- 10 Oral misoprostol tablet (Dose less than 50 mcg)
- 11 Oral misoprostol tablet (dose 50mcg or more)
- 12 Titrated (low dose) oral misoprostol solution
- 13 Sustained release misoprostol vaginal pessary

| [r,1] | [n,1] | [r,2] | [n,2] | [r,3] | [n,3] | [r,4] | [n,4] | [t,1] | [t,2] | [t,3] | [t,4] | na[] | trial name        |
|-------|-------|-------|-------|-------|-------|-------|-------|-------|-------|-------|-------|------|-------------------|
| 4     | 194   | 2     | 203   | NA    | NA    | NA    | NA    | 1     | 6     | NA    | NA    | 2    | Bernstein 1991    |
| 0     | 20    | 1     | 23    | NA    | NA    | NA    | NA    | 1     | 6     | NA    | NA    | 2    | Buttino 1990      |
| 0     | 48    | 1     | 52    | NA    | NA    | NA    | NA    | 4     | 6     | NA    | NA    | 2    | Hales 1994        |
| 1     | 125   | 0     | 122   | NA    | NA    | NA    | NA    | 4     | 6     | NA    | NA    | 2    | Irion 1998        |
| 0     | 15    | 1     | 30    | NA    | NA    | NA    | NA    | 1     | 6     | NA    | NA    | 2    | Laube 1986        |
| 1     | 47    | 2     | 46    | NA    | NA    | NA    | NA    | 1     | 6     | NA    | NA    | 2    | Lien 1998         |
| 1     | 22    | 1     | 28    | NA    | NA    | NA    | NA    | 4     | 6     | NA    | NA    | 2    | Lopes 1991        |
| 0     | 31    | 1     | 30    | NA    | NA    | NA    | NA    | 1     | 6     | NA    | NA    | 2    | McKenna 1999      |
| 1     | 403   | 1     | 413   | NA    | NA    | NA    | NA    | 2     | 6     | NA    | NA    | 2    | Noah 1987         |
| 1     | 71    | 1     | 39    | NA    | NA    | NA    | NA    | 4     | 6     | NA    | NA    | 2    | Nuutila 1996      |
| 0     | 53    | 1     | 47    | NA    | NA    | NA    | NA    | 1     | 6     | NA    | NA    | 2    | Owen 1991         |
| 3     | 30    | 3     | 33    | NA    | NA    | NA    | NA    | 5     | 6     | NA    | NA    | 2    | Perry 2004        |
| 2     | 38    | 2     | 35    | 5     | 38    | NA    | NA    | 5     | 6     | 9     | NA    | 3    | Ramsey 2003       |
| 1     | 40    | 0     | 41    | 1     | 40    | NA    | NA    | 1     | 3     | 6     | NA    | 3    | Thiery 1984       |
| 1     | 29    | 1     | 30    | NA    | NA    | NA    | NA    | 1     | 6     | NA    | NA    | 2    | Trofatter 1985    |
| 11    | 249   | 16    | 265   | NA    | NA    | NA    | NA    | 2     | 6     | NA    | NA    | 2    | Trofatter 1993    |
| 0     | 25    | 1     | 25    | NA    | NA    | NA    | NA    | 1     | 6     | NA    | NA    | 2    | Ulmsten 1983      |
| 2     | 34    | 0     | 35    | NA    | NA    | NA    | NA    | 5     | 6     | NA    | NA    | 2    | Wieland 1999      |
| 2     | 48    | 0     | 52    | NA    | NA    | NA    | NA    | 4     | 6     | NA    | NA    | 2    | Zanini 1990       |
| 1     | 25    | 1     | 25    | NA    | NA    | NA    | NA    | 5     | 6     | NA    | NA    | 2    | Lopez-Farfan 2010 |
| 2     | 100   | 6     | 100   | NA    | NA    | NA    | NA    | 6     | 11    | NA    | NA    | 2    | Bartha 2000       |

|    |     |    |     |    |     |    |    |   |    |    |    |   |                       |
|----|-----|----|-----|----|-----|----|----|---|----|----|----|---|-----------------------|
| 6  | 102 | 5  | 104 | NA | NA  | NA | NA | 9 | 11 | NA | NA | 2 | Bennett 1998          |
| 66 | 501 | 90 | 503 | NA | NA  | NA | NA | 9 | 11 | NA | NA | 2 | Carlan 2001           |
| 12 | 106 | 0  | 101 | NA | NA  | NA | NA | 8 | 12 | NA | NA | 2 | Cheng 2008            |
| 0  | 32  | 2  | 66  | NA | NA  | NA | NA | 1 | 11 | NA | NA | 2 | Cheung 2006           |
| 6  | 111 | 2  | 93  | NA | NA  | NA | NA | 8 | 11 | NA | NA | 2 | Colon 2005            |
| 14 | 100 | 9  | 100 | NA | NA  | NA | NA | 4 | 10 | NA | NA | 2 | Dallenbach 2003       |
| 6  | 376 | 3  | 365 | NA | NA  | NA | NA | 4 | 12 | NA | NA | 2 | Dodd 2006             |
| 15 | 77  | 5  | 76  | NA | NA  | NA | NA | 9 | 11 | NA | NA | 2 | Dyar 2000             |
| 5  | 64  | 1  | 62  | NA | NA  | NA | NA | 9 | 11 | NA | NA | 2 | Fisher 2001           |
| 1  | 30  | 1  | 28  | NA | NA  | NA | NA | 4 | 11 | NA | NA | 2 | Gherman 2001          |
| 4  | 48  | 4  | 59  | NA | NA  | NA | NA | 8 | 11 | NA | NA | 2 | Hall 2002             |
| 1  | 112 | 1  | 112 | NA | NA  | NA | NA | 4 | 11 | NA | NA | 2 | Henrich 2008          |
| 0  | 49  | 1  | 47  | NA | NA  | NA | NA | 1 | 11 | NA | NA | 2 | Hoffman 2001          |
| 10 | 334 | 13 | 328 | NA | NA  | NA | NA | 4 | 12 | NA | NA | 2 | Hofmeyr 2001          |
| 17 | 110 | 5  | 110 | NA | NA  | NA | NA | 8 | 10 | NA | NA | 2 | How 2001              |
| 12 | 95  | 12 | 96  | NA | NA  | NA | NA | 6 | 11 | NA | NA | 2 | Langenegger 2005      |
| 0  | 66  | 2  | 64  | NA | NA  | NA | NA | 1 | 11 | NA | NA | 2 | Levy 2005             |
| 0  | 51  | 3  | 51  | NA | NA  | NA | NA | 1 | 11 | NA | NA | 2 | Lo 2003               |
| 17 | 193 | 21 | 100 | 17 | 103 | NA | NA | 4 | 8  | 12 | NA | 3 | Moodley 2003          |
| 0  | 41  | 1  | 39  | NA | NA  | NA | NA | 1 | 11 | NA | NA | 2 | Ngai 1996             |
| 0  | 53  | 1  | 53  | NA | NA  | NA | NA | 9 | 11 | NA | NA | 2 | Nopdonrattakoon 2003  |
| 2  | 73  | 0  | 73  | NA | NA  | NA | NA | 8 | 11 | NA | NA | 2 | Paisantantiwong 2005  |
| 0  | 95  | 5  | 95  | NA | NA  | NA | NA | 6 | 11 | NA | NA | 2 | Patil 2005            |
| 6  | 84  | 1  | 82  | NA | NA  | NA | NA | 9 | 11 | NA | NA | 2 | Pongsatha 2005        |
| 16 | 124 | 24 | 146 | NA | NA  | NA | NA | 9 | 11 | NA | NA | 2 | Puga 2001             |
| 1  | 50  | 2  | 50  | 1  | 50  | NA | NA | 6 | 8  | 11 | NA | 3 | Sheela 2007           |
| 6  | 123 | 1  | 122 | NA | NA  | NA | NA | 9 | 11 | NA | NA | 2 | Shetty 2001           |
| 2  | 50  | 1  | 51  | NA | NA  | NA | NA | 8 | 11 | NA | NA | 2 | Shetty 2003           |
| 0  | 100 | 2  | 100 | NA | NA  | NA | NA | 3 | 11 | NA | NA | 2 | Shetty 2004           |
| 0  | 66  | 2  | 65  | NA | NA  | NA | NA | 9 | 11 | NA | NA | 2 | Sithiwattanawong 1999 |
| 3  | 48  | 4  | 51  | NA | NA  | NA | NA | 9 | 11 | NA | NA | 2 | Uludag 2005           |
| 3  | 110 | 2  | 110 | NA | NA  | NA | NA | 8 | 11 | NA | NA | 2 | Wing 1999             |
| 0  | 113 | 3  | 121 | NA | NA  | NA | NA | 8 | 11 | NA | NA | 2 | Wing 2000             |
| 1  | 36  | 0  | 36  | NA | NA  | NA | NA | 8 | 11 | NA | NA | 2 | Getgan 2003           |
| 2  | 110 | 0  | 110 | NA | NA  | NA | NA | 8 | 11 | NA | NA | 2 | Rahman 2013           |
| 5  | 80  | 7  | 80  | NA | NA  | NA | NA | 5 | 12 | NA | NA | 2 | Rouzi 2014            |
| 2  | 100 | 2  | 100 | NA | NA  | NA | NA | 8 | 12 | NA | NA | 2 | Souza 2013            |
| 0  | 26  | 1  | 28  | NA | NA  | NA | NA | 1 | 4  | NA | NA | 2 | Curet 1989            |
| 0  | 20  | 2  | 60  | NA | NA  | NA | NA | 1 | 4  | NA | NA | 2 | Graves 1985           |
| 0  | 15  | 1  | 45  | NA | NA  | NA | NA | 1 | 4  | NA | NA | 2 | Hayashi 1988          |
| 0  | 110 | 2  | 110 | NA | NA  | NA | NA | 2 | 4  | NA | NA | 2 | Mahmood 1992          |
| 1  | 100 | 2  | 100 | NA | NA  | NA | NA | 3 | 4  | NA | NA | 2 | Murray 1995           |
| 0  | 45  | 2  | 45  | NA | NA  | NA | NA | 4 | 7  | NA | NA | 2 | Perryman 1992         |
| 3  | 100 | 4  | 100 | NA | NA  | NA | NA | 3 | 5  | NA | NA | 2 | Rabl 2002             |
| 0  | 114 | 4  | 101 | NA | NA  | NA | NA | 1 | 5  | NA | NA | 2 | Rayburn 1992          |
| 7  | 83  | 7  | 62  | NA | NA  | NA | NA | 3 | 4  | NA | NA | 2 | Taher 2010            |
| 0  | 39  | 3  | 42  | NA | NA  | NA | NA | 1 | 5  | NA | NA | 2 | Witter 1992           |
| 0  | 104 | 3  | 102 | NA | NA  | NA | NA | 1 | 5  | NA | NA | 2 | Witter 1996           |
| 1  | 120 | 5  | 118 | NA | NA  | NA | NA | 6 | 9  | NA | NA | 2 | Ayad 2002             |

|    |     |    |     |    |    |    |    |   |   |    |    |   |                    |
|----|-----|----|-----|----|----|----|----|---|---|----|----|---|--------------------|
| 0  | 79  | 14 | 76  | NA | NA | NA | NA | 6 | 9 | NA | NA | 2 | Buser 1997         |
| 0  | 71  | 5  | 72  | NA | NA | NA | NA | 3 | 9 | NA | NA | 2 | Charoenkul 2000    |
| 2  | 50  | 1  | 49  | NA | NA | NA | NA | 6 | 9 | NA | NA | 2 | Chuck 1995         |
| 14 | 66  | 13 | 72  | NA | NA | NA | NA | 6 | 8 | NA | NA | 2 | Clark 1998         |
| 1  | 106 | 0  | 105 | NA | NA | NA | NA | 4 | 9 | NA | NA | 2 | Danielian 1999     |
| 3  | 65  | 5  | 65  | NA | NA | NA | NA | 6 | 9 | NA | NA | 2 | Denguezli 2007     |
| 0  | 93  | 6  | 92  | NA | NA | NA | NA | 8 | 9 | NA | NA | 2 | El Sherbiny 2001   |
| 0  | 73  | 1  | 74  | NA | NA | NA | NA | 8 | 9 | NA | NA | 2 | Eroglu 2007        |
| 10 | 192 | 12 | 207 | NA | NA | NA | NA | 8 | 9 | NA | NA | 2 | Farah 1997         |
| 4  | 31  | 3  | 32  | NA | NA | NA | NA | 3 | 9 | NA | NA | 2 | Fletcher 1994      |
| 1  | 89  | 4  | 97  | NA | NA | NA | NA | 5 | 9 | NA | NA | 2 | Garry 2003         |
| 5  | 300 | 3  | 100 | NA | NA | NA | NA | 2 | 9 | NA | NA | 2 | Gelisen 2005       |
| 0  | 37  | 1  | 38  | NA | NA | NA | NA | 4 | 9 | NA | NA | 2 | Gottschall 2007    |
| 4  | 129 | 1  | 139 | NA | NA | NA | NA | 4 | 8 | NA | NA | 2 | Gregson 2005       |
| 4  | 36  | 5  | 36  | NA | NA | NA | NA | 4 | 9 | NA | NA | 2 | Howarth 1996       |
| 2  | 63  | 3  | 57  | NA | NA | NA | NA | 1 | 8 | NA | NA | 2 | Incerpi 2001       |
| 6  | 112 | 4  | 112 | NA | NA | NA | NA | 6 | 9 | NA | NA | 2 | Kadanali 1996      |
| 1  | 39  | 0  | 39  | 3  | 40 | NA | NA | 5 | 8 | 9  | NA | 3 | Khoury 2001        |
| 1  | 78  | 5  | 81  | NA | NA | NA | NA | 6 | 9 | NA | NA | 2 | Kolderup 1999      |
| 2  | 30  | 1  | 30  | NA | NA | NA | NA | 3 | 9 | NA | NA | 2 | Kovavisarach 1997  |
| 6  | 100 | 7  | 100 | NA | NA | NA | NA | 6 | 8 | NA | NA | 2 | Kumar 2001         |
| 1  | 25  | 0  | 25  | NA | NA | NA | NA | 3 | 9 | NA | NA | 2 | Lee 1997           |
| 0  | 19  | 3  | 17  | NA | NA | NA | NA | 6 | 9 | NA | NA | 2 | Matgibay 1998      |
| 0  | 35  | 1  | 33  | NA | NA | NA | NA | 1 | 8 | NA | NA | 2 | McKenna 2004       |
| 3  | 60  | 2  | 60  | NA | NA | NA | NA | 8 | 9 | NA | NA | 2 | Meydanli 2003      |
| 0  | 29  | 4  | 32  | NA | NA | NA | NA | 6 | 9 | NA | NA | 2 | Neiger 2001        |
| 4  | 94  | 3  | 95  | NA | NA | NA | NA | 4 | 9 | NA | NA | 2 | Nunes 1999         |
| 1  | 83  | 2  | 80  | NA | NA | NA | NA | 3 | 9 | NA | NA | 2 | Papanikolaou 2004  |
| 2  | 225 | 5  | 210 | NA | NA | NA | NA | 4 | 9 | NA | NA | 2 | Pandis 2001        |
| 0  | 63  | 10 | 62  | NA | NA | NA | NA | 7 | 9 | NA | NA | 2 | Rowlands 2001      |
| 2  | 185 | 5  | 184 | NA | NA | NA | NA | 4 | 9 | NA | NA | 2 | Rozenberg 2001     |
| 1  | 70  | 5  | 70  | NA | NA | NA | NA | 5 | 9 | NA | NA | 2 | Rozenberg 2004     |
| 9  | 115 | 12 | 108 | NA | NA | NA | NA | 5 | 9 | NA | NA | 2 | Sanchez Ramos 1998 |
| 0  | 30  | 2  | 32  | NA | NA | NA | NA | 1 | 9 | NA | NA | 2 | Srisomboon 1996    |
| 1  | 50  | 0  | 50  | NA | NA | NA | NA | 3 | 9 | NA | NA | 2 | Surbek 1997        |
| 3  | 137 | 8  | 138 | NA | NA | NA | NA | 6 | 8 | NA | NA | 2 | Wing 1995          |
| 2  | 60  | 6  | 60  | NA | NA | NA | NA | 3 | 9 | NA | NA | 2 | Ayaz 2010          |
| 1  | 50  | 0  | 50  | NA | NA | NA | NA | 8 | 9 | NA | NA | 2 | Girija 2009        |
| 2  | 161 | 0  | 159 | NA | NA | NA | NA | 6 | 8 | NA | NA | 2 | Girija 2011        |
| 1  | 80  | 3  | 68  | NA | NA | NA | NA | 8 | 9 | NA | NA | 2 | Gupta 2010         |
| 2  | 55  | 0  | 52  | NA | NA | NA | NA | 4 | 9 | NA | NA | 2 | Hosli 2008         |
| 12 | 95  | 10 | 96  | NA | NA | NA | NA | 4 | 9 | NA | NA | 2 | Lukugamage 2003    |
| 0  | 60  | 1  | 60  | NA | NA | NA | NA | 8 | 9 | NA | NA | 2 | Nigam 2010         |
| 1  | 56  | 2  | 56  | NA | NA | NA | NA | 5 | 9 | NA | NA | 2 | Ozkan 2009         |
| 4  | 100 | 10 | 100 | NA | NA | NA | NA | 3 | 9 | NA | NA | 2 | Saeed 2011         |
| 1  | 70  | 1  | 70  | 2  | 70 | NA | NA | 6 | 8 | 9  | NA | 3 | Saxena 2011        |
| 2  | 57  | 1  | 112 | NA | NA | NA | NA | 7 | 8 | NA | NA | 2 | Tan 2010           |
| 26 | 340 | 29 | 341 | NA | NA | NA | NA | 4 | 8 | NA | NA | 2 | Van Germund 2004   |
| 0  | 33  | 2  | 36  | NA | NA | NA | NA | 6 | 8 | NA | NA | 2 | Varaklis 1995      |

|    |     |    |     |    |    |    |    |    |    |    |    |   |                      |
|----|-----|----|-----|----|----|----|----|----|----|----|----|---|----------------------|
| 2  | 67  | 5  | 68  | NA | NA | NA | NA | 6  | 9  | NA | NA | 2 | Wing 1995            |
| 4  | 98  | 1  | 99  | NA | NA | NA | NA | 5  | 8  | NA | NA | 2 | Wing 1997            |
| 28 | 436 | 39 | 871 | NA | NA | NA | NA | 5  | 13 | NA | NA | 2 | Wing 2008            |
| 18 | 680 | 70 | 678 | NA | NA | NA | NA | 5  | 13 | NA | NA | 2 | Wing 2013            |
| 0  | 42  | 1  | 43  | NA | NA | NA | NA | 1  | 9  | NA | NA | 2 | Deng 1999            |
| 1  | 100 | 0  | 100 | NA | NA | NA | NA | 8  | 11 | NA | NA | 2 | Komala 2013          |
| 0  | 36  | 1  | 37  | NA | NA | NA | NA | 5  | 6  | NA | NA | 2 | Chyu 1997            |
| 2  | 50  | 3  | 50  | NA | NA | NA | NA | 6  | 8  | NA | NA | 2 | Nanda 2007           |
| 1  | 132 | 2  | 135 | NA | NA | NA | NA | 4  | 11 | NA | NA | 2 | Tessier 1997         |
| 0  | 35  | 1  | 37  | NA | NA | NA | NA | 6  | 8  | NA | NA | 2 | Murthy 2006          |
| 0  | 30  | 0  | 30  | NA | NA | NA | NA | 4  | 7  | NA | NA | 2 | Ekman 1983           |
| 0  | 38  | 0  | 41  | NA | NA | NA | NA | 2  | 7  | NA | NA | 2 | Gilson 1993          |
| 0  | 57  | 0  | 56  | NA | NA | NA | NA | 7  | 8  | NA | NA | 2 | Legarth 1988         |
| 0  | 15  | 0  | 15  | NA | NA | NA | NA | 1  | 7  | NA | NA | 2 | Nager 1987           |
| 0  | 15  | 0  | 30  | NA | NA | NA | NA | 2  | 7  | NA | NA | 2 | Nimrod 1984          |
| 0  | 98  | 0  | 110 | NA | NA | NA | NA | 3  | 7  | NA | NA | 2 | Rix 1996             |
| 0  | 44  | 0  | 39  | NA | NA | NA | NA | 4  | 7  | NA | NA | 2 | Stempel 1997         |
| 0  | 41  | 0  | 40  | NA | NA | NA | NA | 7  | 8  | NA | NA | 2 | Yuen 1996            |
| 0  | 9   | 0  | 10  | NA | NA | NA | NA | 7  | 8  | NA | NA | 2 | Taechakraichana 1996 |
| 0  | 66  | 0  | 62  | NA | NA | NA | NA | 5  | 7  | NA | NA | 2 | Wielgos 2007         |
| 0  | 78  | 0  | 78  | NA | NA | NA | NA | 2  | 12 | NA | NA | 2 | Beigi 2003           |
| 0  | 52  | 0  | 51  | NA | NA | NA | NA | 10 | 12 | NA | NA | 2 | Jindal 2011          |
| 0  | 30  | 0  | 30  | NA | NA | NA | NA | 9  | 12 | NA | NA | 2 | Khazardoost 2011     |
| 0  | 23  | 0  | 29  | NA | NA | NA | NA | 11 | 12 | NA | NA | 2 | Kipikasa 2005        |
| 0  | 82  | 0  | 78  | NA | NA | NA | NA | 10 | 12 | NA | NA | 2 | Kwon 2001            |
| 0  | 76  | 0  | 75  | NA | NA | NA | NA | 10 | 12 | NA | NA | 2 | Paungmora 2004       |
| 0  | 150 | 0  | 150 | NA | NA | NA | NA | 1  | 12 | NA | NA | 2 | Rath 2007            |
| 0  | 31  | 0  | 30  | NA | NA | NA | NA | 1  | 12 | NA | NA | 2 | Shetty 2002a         |
| 0  | 104 | 0  | 95  | NA | NA | NA | NA | 2  | 8  | NA | NA | 2 | Campbell 1984        |
| 0  | 18  | 0  | 15  | NA | NA | NA | NA | 2  | 4  | NA | NA | 2 | Chatterjee 1990      |
| 0  | 76  | 0  | 79  | NA | NA | NA | NA | 2  | 8  | NA | NA | 2 | Chua 1995            |
| 0  | 28  | 0  | 28  | NA | NA | NA | NA | 2  | 3  | NA | NA | 2 | Domisse 1980         |
| 0  | 100 | 0  | 100 | NA | NA | NA | NA | 3  | 8  | NA | NA | 2 | El Mardi 1991        |
| 0  | 38  | 0  | 34  | NA | NA | NA | NA | 4  | 5  | NA | NA | 2 | El Shawarby 2006     |
| 0  | 38  | 0  | 37  | NA | NA | NA | NA | 4  | 6  | NA | NA | 2 | Neilson 1983         |
| 0  | 63  | 0  | 55  | NA | NA | NA | NA | 2  | 4  | NA | NA | 2 | Rayburn 1988         |
| 0  | 26  | 0  | 24  | NA | NA | NA | NA | 2  | 4  | NA | NA | 2 | Sawai 1991           |
| 0  | 65  | 0  | 65  | NA | NA | NA | NA | 4  | 5  | NA | NA | 2 | Triglia 2010         |
| 0  | 60  | 0  | 60  | NA | NA | NA | NA | 7  | 10 | NA | NA | 2 | Argarwal 2003        |
| 0  | 40  | 0  | 44  | NA | NA | NA | NA | 7  | 10 | NA | NA | 3 | Lemancewicz 1999     |
| 0  | 27  | 0  | 30  | NA | NA | NA | NA | 4  | 10 | NA | NA | 2 | Saggaf 2001          |
| 0  | 31  | 0  | 35  | NA | NA | NA | NA | 7  | 10 | NA | NA | 2 | Shakya 2010          |
| 0  | 42  | 0  | 42  | NA | NA | NA | NA | 7  | 9  | NA | NA | 2 | Meyer 2002           |

**Table 13: Datafile for OpenBUGS analysis of serious neonatal morbidity or perinatal death**

Treatments included in analysis:

- 1 Placebo
- 2 No treatment
- 3 Vaginal PGE2 (tablet)
- 4 Vaginal PGE2 (gel)
- 5 Vaginal PGE2 pessary (slow release)
- 6 PGF2 gel
- 7 Intracervical PGE2
- 8 Vaginal PGE2 pessary (normal release)
- 9 Vaginal misoprostol (Dose less than 50 mcg)
- 10 Vaginal misoprostol (Dose 50 mcg or more)
- 11 Oral misoprostol tablet (Dose less than 50 mcg)
- 12 Oral misoprostol tablet (dose 50mcg or more)
- 13 Titrated (low dose) oral misoprostol solution
- 14 Sustained release misoprostol vaginal pessary

| [r,1] | [n,1] | [r,2] | [n,2] | [r,3] | [n,3] | [r,4] | [n,4] | [t,1] | [t,2] | [t,3] | [t,4] | na[] | trial name         |
|-------|-------|-------|-------|-------|-------|-------|-------|-------|-------|-------|-------|------|--------------------|
| 0     | 64    | 1     | 61    | NA    | NA    | NA    | NA    | 7     | 8     | NA    | NA    | 2    | Lyndrup 1991       |
| 2     | 403   | 0     | 413   | NA    | NA    | NA    | NA    | 2     | 7     | NA    | NA    | 2    | Noah 1987          |
| 1     | 349   | 1     | 345   | NA    | NA    | NA    | NA    | 4     | 12    | NA    | NA    | 2    | Hofmeyr 2001       |
| 1     | 76    | 1     | 75    | 2     | 128   | 1     | 127   | 6     | 8     | 10    | 12    | 4    | Majoko 2002        |
| 1     | 193   | 2     | 100   | 0     | 103   | NA    | NA    | 4     | 9     | 12    | NA    | 3    | Moodley 2003       |
| 1     | 110   | 0     | 110   | NA    | NA    | NA    | NA    | 9     | 11    | NA    | NA    | 2    | Rahman 2013        |
| 1     | 80    | 1     | 80    | NA    | NA    | NA    | NA    | 5     | 12    | NA    | NA    | 2    | Rouzi 2014         |
| 1     | 165   | 0     | 180   | NA    | NA    | NA    | NA    | 2     | 3     | NA    | NA    | 2    | Husslein 1986      |
| 0     | 32    | 1     | 52    | NA    | NA    | NA    | NA    | 1     | 8     | NA    | NA    | 2    | Liggins 1979       |
| 0     | 79    | 2     | 76    | NA    | NA    | NA    | NA    | 7     | 10    | NA    | NA    | 2    | Buser 1997         |
| 1     | 300   | 0     | 100   | NA    | NA    | NA    | NA    | 2     | 10    | NA    | NA    | 2    | Gelisen 2005       |
| 1     | 39    | 0     | 38    | NA    | NA    | NA    | NA    | 2     | 9     | NA    | NA    | 2    | Oboro 2005         |
| 1     | 83    | 0     | 80    | NA    | NA    | NA    | NA    | 3     | 10    | NA    | NA    | 2    | Papanikolaou 2004  |
| 1     | 60    | 0     | 60    | NA    | NA    | NA    | NA    | 3     | 10    | NA    | NA    | 2    | Ayaz 2010          |
| 1     | 102   | 1     | 105   | NA    | NA    | NA    | NA    | 4     | 9     | NA    | NA    | 2    | Chaudhuri 2011     |
| 0     | 57    | 1     | 56    | NA    | NA    | NA    | NA    | 2     | 10    | NA    | NA    | 2    | Frass 2011         |
| 2     | 1261  | 1     | 1259  | NA    | NA    | NA    | NA    | 2     | 4     | NA    | NA    | 2    | Hannah 1996        |
| 0     | 175   | 0     | 91    | 0     | 174   | NA    | NA    | 1     | 2     | 7     | NA    | 3    | NICHHD 1994        |
| 0     | 44    | 0     | 44    | NA    | NA    | NA    | NA    | 1     | 7     | NA    | NA    | 2    | Hidar 2000         |
| 0     | 21    | 0     | 24    | NA    | NA    | NA    | NA    | 2     | 7     | NA    | NA    | 2    | Nuutila 1995       |
| 0     | 71    | 0     | 39    | NA    | NA    | NA    | NA    | 4     | 7     | NA    | NA    | 2    | Nuutila 1996       |
| 0     | 36    | 0     | 35    | NA    | NA    | NA    | NA    | 1     | 7     | NA    | NA    | 2    | Perez Picanol 1990 |
| 0     | 31    | 0     | 37    | NA    | NA    | NA    | NA    | 4     | 7     | NA    | NA    | 2    | Seeras 1995        |
| 0     | 26    | 0     | 22    | NA    | NA    | NA    | NA    | 3     | 7     | NA    | NA    | 2    | Herabutya 1993     |
| 0     | 75    | 0     | 75    | NA    | NA    | NA    | NA    | 1     | 7     | NA    | NA    | 2    | Sahraoui 2005      |
| 0     | 85    | 0     | 93    | NA    | NA    | NA    | NA    | 10    | 12    | NA    | NA    | 2    | Adair 1998         |
| 0     | 100   | 0     | 100   | NA    | NA    | NA    | NA    | 7     | 12    | NA    | NA    | 2    | Bartha 2000        |
| 0     | 376   | 0     | 365   | NA    | NA    | NA    | NA    | 4     | 13    | NA    | NA    | 2    | Dodd 2006          |
| 0     | 52    | 0     | 51    | NA    | NA    | NA    | NA    | 10    | 12    | NA    | NA    | 2    | Jindal 2011        |
| 0     | 23    | 0     | 29    | NA    | NA    | NA    | NA    | 11    | 12    | NA    | NA    | 2    | Kipikasaa 2005     |
| 0     | 95    | 0     | 96    | NA    | NA    | NA    | NA    | 7     | 12    | NA    | NA    | 2    | Langenegger 2005   |
| 0     | 65    | 0     | 69    | NA    | NA    | NA    | NA    | 10    | 13    | NA    | NA    | 2    | Zvandasara 2008    |
| 0     | 100   | 0     | 100   | NA    | NA    | NA    | NA    | 9     | 13    | NA    | NA    | 2    | Souza 2013         |



|   |     |   |     |    |    |    |    |    |    |    |    |   |                   |
|---|-----|---|-----|----|----|----|----|----|----|----|----|---|-------------------|
| 0 | 50  | 0 | 50  | NA | NA | NA | NA | 1  | 5  | NA | NA | 2 | Berzircioglu 2012 |
| 0 | 28  | 0 | 28  | NA | NA | NA | NA | 2  | 3  | NA | NA | 2 | Domisse 1980      |
| 0 | 50  | 0 | 50  | NA | NA | NA | NA | 1  | 4  | NA | NA | 2 | Mahmood 1995      |
| 0 | 36  | 0 | 33  | NA | NA | NA | NA | 2  | 5  | NA | NA | 2 | Prasad 1989       |
| 0 | 15  | 0 | 15  | NA | NA | NA | NA | 2  | 4  | NA | NA | 2 | Prins 1983        |
| 0 | 114 | 0 | 101 | NA | NA | NA | NA | 2  | 5  | NA | NA | 2 | Rayburn 1992      |
| 0 | 100 | 0 | 100 | NA | NA | NA | NA | 1  | 3  | NA | NA | 2 | Shoab 1994        |
| 0 | 75  | 0 | 75  | NA | NA | NA | NA | 1  | 9  | NA | NA | 2 | Da Graca 2005     |
| 0 | 39  | 0 | 39  | 0  | 40 | NA | NA | 5  | 9  | 10 | NA | 3 | Khoury 2001       |
| 0 | 15  | 0 | 15  | NA | NA | NA | NA | 4  | 10 | NA | NA | 2 | Steytler 1995     |
| 0 | 56  | 0 | 56  | NA | NA | NA | NA | 5  | 10 | NA | NA | 2 | Ozkan 2009        |
| 0 | 31  | 0 | 35  | NA | NA | NA | NA | 7  | 10 | NA | NA | 2 | Shakya 2010       |
| 0 | 33  | 0 | 36  | NA | NA | NA | NA | 7  | 9  | NA | NA | 2 | Varaklis 1995     |
| 0 | 436 | 0 | 871 | NA | NA | NA | NA | 5  | 14 | NA | NA | 2 | Wing 2008         |
| 0 | 680 | 0 | 678 | NA | NA | NA | NA | 5  | 14 | NA | NA | 2 | Wing 2013         |
| 0 | 100 | 0 | 100 | NA | NA | NA | NA | 9  | 12 | NA | NA | 2 | Komala 2013       |
| 0 | 50  | 0 | 50  | NA | NA | NA | NA | 10 | 12 | NA | NA | 2 | Sultana 2006      |
| 0 | 132 | 0 | 135 | NA | NA | NA | NA | 4  | 12 | NA | NA | 2 | Tessier 1997      |

**Table 14: Datafile for OpenBUGS analysis of serious maternal morbidity or death.**

Treatments included in analysis:

- 1 Placebo
- 2 No treatment
- 3 Vaginal PGE2 (tablet)
- 4 Vaginal PGE2 (gel)
- 5 Vaginal PGE2 pessary (slow release)
- 6 PGF2 gel
- 7 Intracervical PGE2
- 8 Vaginal PGE2 pessary (normal release)
- 9 Vaginal misoprostol (Dose less than 50 mcg)
- 10 Vaginal misoprostol (Dose 50 mcg or more)
- 11 Oral misoprostol tablet (Dose less than 50 mcg)
- 12 Oral misoprostol tablet (dose 50mcg or more)
- 13 Titrated (low dose) oral misoprostol solution
- 14 Sustained release misoprostol vaginal pessary

| [r,1] | [n,1] | [r,2] | [n,2] | [r,3] | [n,3] | [r,4] | [n,4] | [t, 1] | [t,2] | [t,3] | [t,4] | na[] | trial name         |
|-------|-------|-------|-------|-------|-------|-------|-------|--------|-------|-------|-------|------|--------------------|
| 1     | 403   | 0     | 413   | NA    | NA    | NA    | NA    | 1      | 3     | NA    | NA    | 2    | Noah 1987          |
| 0     | 26    | 1     | 22    | NA    | NA    | NA    | NA    | 2      | 3     | NA    | NA    | 2    | Herabutya 1993     |
| 0     | 100   | 1     | 100   | NA    | NA    | NA    | NA    | 3      | 4     | NA    | NA    | 2    | Chitraker 2012     |
| 0     | 50    | 1     | 50    | NA    | NA    | NA    | NA    | 4      | 5     | NA    | NA    | 2    | Girija 2009        |
| 0     | 175   | 0     | 91    | 0     | 174   | NA    | NA    | 1      | 2     | 7     | NA    | 3    | Collab NICHHD 1994 |
| 0     | 376   | 0     | 365   | NA    | NA    | NA    | NA    | 4      | 13    | NA    | NA    | 2    | Dodd 2006          |
| 0     | 349   | 0     | 346   | NA    | NA    | NA    | NA    | 4      | 13    | NA    | NA    | 2    | Hofmeyer 2001      |
| 0     | 52    | 0     | 51    | NA    | NA    | NA    | NA    | 10     | 12    | NA    | NA    | 2    | Jindal 2011        |
| 0     | 23    | 0     | 29    | NA    | NA    | NA    | NA    | 11     | 12    | NA    | NA    | 2    | Kipikasa 2005      |
| 0     | 95    | 0     | 96    | NA    | NA    | NA    | NA    | 7      | 12    | NA    | NA    | 2    | Langenegger 2005   |
| 0     | 65    | 0     | 69    | NA    | NA    | NA    | NA    | 10     | 13    | NA    | NA    | 2    | Zvandasara 2008    |
| 0     | 100   | 0     | 100   | NA    | NA    | NA    | NA    | 9      | 13    | NA    | NA    | 2    | Souza 2013         |
| 0     | 50    | 0     | 50    | NA    | NA    | NA    | NA    | 1      | 5     | NA    | NA    | 2    | Bezircioglu 2012   |
| 0     | 36    | 0     | 33    | NA    | NA    | NA    | NA    | 2      | 5     | NA    | NA    | 2    | Prasad 1989        |

|   |     |   |     |    |    |    |    |   |    |    |    |   |               |
|---|-----|---|-----|----|----|----|----|---|----|----|----|---|---------------|
| 0 | 75  | 0 | 75  | NA | NA | NA | NA | 1 | 9  | NA | NA | 2 | Da Graca 2005 |
| 0 | 56  | 0 | 56  | NA | NA | NA | NA | 5 | 10 | NA | NA | 2 | Ozkan 2009    |
| 0 | 436 | 0 | 871 | NA | NA | NA | NA | 5 | 14 | NA | NA | 2 | Wing 2008     |
| 0 | 680 | 0 | 678 | NA | NA | NA | NA | 5 | 14 | NA | NA | 2 | Wing 2013     |

**Table 15: Sensitivity and subgroup analysis: posterior median ranks for vaginal delivery and caesarean section**

|                                                        | Vaginal delivery not achieved within 24 hours<br>(studies at low risk of bias) |                                          |                                              | Caesarean section<br>(studies at low risk of bias) |                                           |                                              |
|--------------------------------------------------------|--------------------------------------------------------------------------------|------------------------------------------|----------------------------------------------|----------------------------------------------------|-------------------------------------------|----------------------------------------------|
|                                                        | <i>Rankings (95% CrIs)</i>                                                     |                                          |                                              | <i>Rankings (95% CrIs)</i>                         |                                           |                                              |
|                                                        | All studies<br>(64 trials)                                                     | Women with CS<br>excluded<br>(52 trials) | Placebo and no trt<br>removed<br>(56 trials) | All studies<br>(161 trials)                        | Women with CS<br>excluded<br>(118 trials) | Placebo and no trt<br>removed<br>(90 trials) |
| <b>Placebo</b>                                         | 13 (12,13)                                                                     | 13 (12,13)                               | -                                            | 11 (7,14)                                          | 11 (3,14)                                 | -                                            |
| <b>No treatment</b>                                    | 12 (9,13)                                                                      | 12 (10,13)                               | -                                            | 11 (5,14)                                          | 12 (8,14)                                 | -                                            |
| <b>Vaginal PGE2 (tablet)</b>                           | 5 (1,10)                                                                       | 6 (1,11)                                 | 6 (1,10)                                     | 11 (6,14)                                          | 11 (5,14)                                 | 10 (5,12)                                    |
| <b>Vaginal PGE2 (gel)</b>                              | 4 (2,8)                                                                        | 5 (2,8)                                  | 4 (2,8)                                      | 6 (3,9)                                            | 6 (3,10)                                  | 6 (3,9)                                      |
| <b>Vaginal PGE2 pessary (slow release)</b>             | 7 (3,10)                                                                       | 8 (2,11)                                 | 7 (3,10)                                     | 8 (3,13)                                           | 7 (2,12)                                  | 8 (2,11)                                     |
| <b>PGF2 gel</b>                                        | Not in network                                                                 | Not in network                           | Not in network                               | 10 (1,14)                                          | 14 (2,14)                                 | 11 (2,12)                                    |
| <b>Intracervical PGE2</b>                              | 9 (7,11)                                                                       | 10 (7,11)                                | 9 (7,11)                                     | 7 (4,11)                                           | 8 (3,11)                                  | 7 (3,10)                                     |
| <b>Vaginal PGE2 pessary (normal release)</b>           | 11 (6,12)                                                                      | 10 (1,12)                                | 10 (2,11)                                    | 10 (3,14)                                          | 12 (3,14)                                 | 11 (4,12)                                    |
| <b>Vaginal misoprostol (Dose less than 50 mcg)</b>     | 4 (2,7)                                                                        | 5 (2,8)                                  | 4 (2,7)                                      | 4 (2,8)                                            | 6 (2,10)                                  | 6 (2,9)                                      |
| <b>Vaginal misoprostol (Dose 50 mcg or more)</b>       | 1 (1,4)                                                                        | 2 (1,6)                                  | 1 (1,4)                                      | 3 (1,6)                                            | 4 (2,8)                                   | 4 (2,8)                                      |
| <b>Oral misoprostol tablet (Dose less than 50 mcg)</b> | 10 (4,12)                                                                      | 8 (1,12)                                 | 10 (4,11)                                    | 13 (3,14)                                          | 4 (1,14)                                  | 4 (1,12)                                     |
| <b>Oral misoprostol tablet (dose 50mcg or more)</b>    | 6 (3,8)                                                                        | 7 (3,10)                                 | 6 (3,9)                                      | 3 (1,7)                                            | 3 (1,7)                                   | 3 (1,7)                                      |
| <b>Titrated (low dose) oral misoprostol solution</b>   | 2 (1,7)                                                                        | 2 (1,8)                                  | 2 (1,7)                                      | 1 (1,5)                                            | 2 (1,6)                                   | 2 (1,6)                                      |
| <b>Sustained release misoprostol vaginal pessary</b>   | 7 (1,11)                                                                       | 7 (1,12)                                 | 7 (1,11)                                     | 10 (1,14)                                          | 9 (1,14)                                  | 9 (1,12)                                     |

Posterior median rankings and 95% credible intervals (CrI) for each treatment under three conditions: (1) where all studies were included in the network; (2) exclusion of trials which had randomized all or some women with previous caesarean section; (3) where studies with a no treatment or placebo comparator were excluded from the analysis.

**Table 16: comparison of risk ratio and odds ratio for vaginal delivery and Cesarean section**

| Treatment comparison: Placebo vs              | Vaginal delivery not in 24hrs |                     | Cesarean section            |                     |
|-----------------------------------------------|-------------------------------|---------------------|-----------------------------|---------------------|
|                                               | Treatment effects (95% CrI)   |                     | Treatment effects (95% CrI) |                     |
|                                               | <i>Odds ratio</i>             | <i>Risk Ratio</i>   | <i>Odds ratio</i>           | <i>Risk ratio</i>   |
| No treatment                                  | 0.32 (0.09 to 1.14)           | 0.85 (0.25 to 1.01) | 0.99 (0.74 to 1.32)         | 0.99 (0.78 to 1.25) |
| Vaginal PGE2 (tablet)                         | 0.08 (0.03 to 0.20)           | 0.48 (0.08 to 0.97) | 0.91 (0.69 to 1.23)         | 0.93 (0.73 to 1.18) |
| Vaginal PGE2 (gel)                            | 0.08 (0.03 to 0.17)           | 0.46 (0.08 to 0.96) | 0.80 (0.68 to 0.95)         | 0.84 (0.72 to 0.96) |
| Vaginal PGE2 pessary (slow release)           | 0.10 (0.04 to 0.24)           | 0.53 (0.10 to 0.97) | 0.88 (0.66 to 1.14)         | 0.9 (0.71 to 1.11)  |
| PGF2 gel                                      | Not in network                | Not in network      | 0.95 (0.58 to 1.59)         | 0.96 (0.63 to 1.44) |
| Intracervical PGE2                            | 0.12 (0.06 to 0.26)           | 0.59 (0.13 to 0.98) | 0.86 (0.72 to 1.01)         | 0.88 (0.76 to 1.01) |
| Vaginal PGE2 pessary (normal release)         | 0.19 (0.07 to 0.52)           | 0.71 (0.17 to 0.99) | 0.97 (0.69 to 1.33)         | 0.97 (0.74 to 1.25) |
| Vaginal misoprostol (< 50 mcg)                | 0.07 (0.03 to 0.16)           | 0.45 (0.08 to 0.96) | 0.76 (0.63 to 0.92)         | 0.8 (0.67 to 0.94)  |
| Vaginal misoprostol (>50mcg)                  | 0.06 (0.02 to 0.12)           | 0.37 (0.06 to 0.95) | 0.73 (0.6 to 0.89)          | 0.78 (0.65 to 0.91) |
| Oral misoprostol tablet (>50 mcg)             | 0.16 (0.05 to 0.48)           | 0.67 (0.14 to 0.99) | 1.13 (0.70 to 1.87)         | 1.1 (0.74 to 1.62)  |
| Oral misoprostol tablet (> 50mcg)             | 0.08 (0.04 to 0.18)           | 0.49 (0.09 to 0.97) | 0.72 (0.59 to 0.89)         | 0.77 (0.63 to 0.91) |
| Titrated (low dose) oral misoprostol solution | 0.06 (0.03 to 0.15)           | 0.40 (0.06 to 0.95) | 0.64 (0.49 to 0.83)         | 0.69 (0.54 to 0.87) |
| Sustained release misoprostol vaginal pessary | 0.09 (0.03 to 0.35)           | 0.52 (0.07 to 0.98) | 0.94 (0.61 to 1.46)         | 0.96 (0.66 to 1.34) |
