# Supplementary material
Source: PubMed Central journal article supplement (PMC4794072)
Supplement: alfz022734.w7_default.pdf [file alfz022734.w7_default.pdf]

## Appendix 7: Technical appendix

### Open Bugs code: random effects consistency model

([http://www.nicedsu.org.uk/Evidence-Synthesis-TSD-series\(2391675\).htm](http://www.nicedsu.org.uk/Evidence-Synthesis-TSD-series(2391675).htm))

```
model{
for(i in 1:ns){
  w[i,1] <- 0      # adjustment for multi-arm trials is zero for control
arm
  delta[i,1] <- 0      # treatment effect is zero for control arm
  mu[i] ~ dnorm(0,.0001) # vague priors for all trial baselines

  for (k in 1:na[i]) {
    r[i,k] ~ dbin(p[i,k],n[i,k])      #binomial likelihood
    logit(p[i,k]) <- mu[i] + delta[i,k]      # model for linear
predictor
    rhat[i,k] <- p[i,k] * n[i,k]      # expected value of the
numerators

#Deviance contribution
    dev[i,k] <- 2 * (r[i,k] * (log(r[i,k])-log(rhat[i,k])))
+ (n[i,k]-r[i,k]) * (log(n[i,k]-r[i,k]) - log(n[i,k]-rhat[i,k])))
  }

#Summed residual deviance contribution for this trial
  resdev[i] <- sum(dev[i,1:na[i]])

for (k in 2:na[i]) {
# trial-specific LOR distributions
  delta[i,k] ~ dnorm(md[i,k],taud[i,k])
# mean of LOR distributions (with multi-arm trial correction)
  md[i,k] <- d[t[i,k]] - d[t[i,1]] + sw[i,k]
# precision of LOR distributions (with multi-arm trial correction)
  taud[i,k] <- tau *2*(k-1)/k
# adjustment for multi-arm RCTs
  w[i,k] <- (delta[i,k] - d[t[i,k]] + d[t[i,1]])
# cumulative adjustment for multi-arm trials
  sw[i,k] <- sum(w[i,1:k-1])/(k-1)  }  }

totresdev <- sum(resdev[])      # Total Residual Deviance
d[1]<-0      # treatment effect is zero for reference treatment

# vague priors for treatment effects
for (k in 2:nt){ d[k] ~ dnorm(0,.0001) }

sd ~ dunif(0,5)      # vague prior for between-trial SD
tau <- pow(sd,-2)    # between-trial precision = (1/between-trial variance)

# ranking on relative scale
for (k in 1:nt) { rk[k] <- rank(d[,k])      # assumes events are "bad"
best[k] <- equals(rk[k],1)      #calculate probability that treat k is best
# calculates probability that treat k is h-th best
for (h in 1:nt){ prob[h,k] <- equals(rk[k],h) }      }

# pairwise ORs and LORs for all possible pair-wise comparisons
for (c in 1:(nt-1)) {
for (k in (c+1):nt) {
or[c,k] <- exp(d[k] - d[c])
lor[c,k] <- (d[k]-d[c])
}}}
```

## **2. Prior distributions used in the network meta-analyses of three outcomes reported in the paper**

### *Vaginal delivery*

All prior distributions in the vaginal delivery random effects consistency model were vague.

Trial baseline parameter:  $\mu \sim \text{dnorm}(0,10000)$

Treatment effect parameter:  $d \sim \text{dnorm}(0,10000)$

Heterogeneity parameter:  $sd \sim \text{dunif}(0,5)$

### *Caesarean section*

All prior distributions in the caesarean section random effects consistency model were vague.

Trial baseline parameter:  $\mu \sim \text{dnorm}(0,10000)$

Treatment effect parameter:  $d \sim \text{dnorm}(0,10000)$

Heterogeneity parameter:  $sd \sim \text{dunif}(0,5)$

### *Hyperstimulation*

All prior distributions in the hyperstimulation random effects consistency model were vague.

Trial baseline parameter:  $\mu \sim \text{dnorm}(0,10000)$

Treatment effect parameter:  $d \sim \text{dnorm}(0,10000)$

Heterogeneity parameter:  $sd \sim \text{dunif}(0,5)$

## **3. Details of convergence for all three outcomes reported in the paper for random effects consistency models.**

### *Vaginal delivery*

Convergence was assessed using two chains using the Brooks-Gelman-Rubin tool in OpenBUGS and was achieved by 35,000 simulations for vaginal delivery (random effects consistency model).

Estimates are based on a further 70,000 updates.

### *Caesarean section*

Convergence was assessed using two chains using the Brooks-Gelman-Rubin tool in OpenBUGS and was achieved by 90,000 simulations for cesarean section (RE consistency model). Estimates are based on a further 180,000 updates.

### *Hyperstimulation*

Convergence was assessed using two chains using the Brooks-Gelman-Rubin tool in OpenBUGS and was achieved by 21,000 simulations (RE consistency model). Estimates are based on a further 60,000 updates.
